# Supplementary material for: Revealing the structure of information flows discriminates similar animal social behaviors
Source: eLife. 2020 Jul 30;9:e55395. doi: 10.7554/eLife.55395 (PMC7392607; doi:10.7554/eLife.55395)
Supplement: Figure 7—source data 1. [file elife-55395-fig7-data1.csv]

	Dataset	Encoding	SS	K	ID	ERl	ERf	TElf	TEfl	TElfc	TEflc
1	temnothorax	M	1	1	H16T001R002	0.543734696818804	0.434810679098586	-0.00070767675481296	2.86489248157584e-05	7.96403106140133e-06	1.51586882347193e-05
2	temnothorax	M	1	1	H16T001R003	0.502234060967128	0.403922585852081	-0.000324319220213299	0.000242741835511661	5.68784176485242e-06	9.42081477427985e-06
3	temnothorax	M	1	1	H9T001R003	0.661977143863202	0.383903893273323	0.000341994552558192	0.000124427185004125	1.45003592665831e-05	1.02660360527427e-05
4	temnothorax	M	1	1	H31T001R001	0.525162959801565	0.309656301136321	0.000185567801578321	2.71583168670665e-05	8.6531227311699e-06	5.69794047066706e-06
5	temnothorax	M	1	1	H31T001R002	0.487685598692688	0.269448497509201	0.000378274058944647	-5.57862508374527e-05	1.49500803582118e-05	1.46347407142427e-05
6	temnothorax	M	1	1	H31T001R003	0.507332099504711	0.318208670358583	-2.55082248877921e-05	1.59326972117929e-06	-1.10565642984153e-05	7.03254016436892e-07
7	temnothorax	M	1	1	H31T001R008	0.775840918561194	0.409023762168851	0.000527484233667016	6.81357935085268e-05	4.8835269623944e-05	3.62621102058525e-05
8	temnothorax	M	1	1	H31T001R015	0.498797383168791	0.320892752394108	5.24179354088789e-05	-4.16643207187176e-06	-3.41624382443055e-06	4.86645794365613e-06
9	temnothorax	M	1	1	H31T001R017	0.516727427505698	0.300566462854415	0.000535525969042808	-9.59780279306282e-05	-5.0064423186575e-06	-1.68736758814331e-06
10	temnothorax	M	1	1	H14T001R002	0.482959242036405	0.216609962836336	0.000287291152218485	-2.29103383628131e-05	-8.60219082161439e-07	-9.7493001407388e-06
11	temnothorax	M	1	1	H14T001R005	0.545790298463887	0.290415773270101	-0.000126338622456108	1.7483308078927e-05	6.82703261921844e-06	7.49556072720954e-06
12	temnothorax	M	1	1	H14T001R017	0.41199825410795	0.215876743584526	0.000492050210617508	2.54375093152419e-05	9.43990660200078e-06	1.39334716823994e-05
13	temnothorax	M	1	1	H14T001R024	0.645345538622552	0.332482236573976	-7.74483908045476e-05	-0.000101786246767346	7.72076169882616e-06	1.12004761688303e-06
14	temnothorax	M	1	1	H1T001R005	0.470366948530621	0.25844353036883	0.00037041888728131	-6.84795343233974e-05	6.40490225921353e-06	-1.222679448667e-06
15	temnothorax	M	1	1	H1T001R007	0.551879686161451	0.370859975509598	3.71787167483146e-05	1.19689079989434e-05	-1.48001143863868e-06	7.22599125604566e-06
16	temnothorax	M	1	1	H1T001R010	0.557794505883827	0.297724437147457	2.669771960793e-05	7.86197867872472e-05	1.08706462387592e-07	4.43739045149931e-06
17	temnothorax	M	1	1	H1T001R012	0.562709697685552	0.352858977873677	9.89168567636237e-05	-1.07590404830174e-05	3.58353531887972e-06	2.11322605871364e-06
18	temnothorax	M	1	1	H36T001R005	0.52582269348779	0.294245109833483	0.000548897963150822	6.18212391727152e-05	9.56289097263031e-07	-4.13280415636972e-06
19	temnothorax	M	1	1	H36T001R011	0.455031760397334	0.257071167202909	7.33895509674927e-05	1.16528673456409e-05	2.49680582567775e-06	-4.63332734304345e-06
20	temnothorax	M	1	1	H36T001R013	0.594211379355707	0.408225983718147	0.000373965291908043	0.000136248032259383	9.53110925253709e-06	3.54729436560521e-06
21	temnothorax	M	1	2	H16T001R002	0.526491472696266	0.420715780801319	-0.000565908428339896	0.000167524551000527	1.69885308292243e-05	1.30687020646546e-05
22	temnothorax	M	1	2	H16T001R003	0.487784285434974	0.38881857003094	-0.000230833052655487	0.000236968893300477	1.23938494238695e-05	5.29473418905354e-06
23	temnothorax	M	1	2	H9T001R003	0.636645260636117	0.378342282143268	0.000350476988038322	0.00012038522796702	6.15876839848249e-06	5.15410327686422e-06
24	temnothorax	M	1	2	H31T001R001	0.508920982549007	0.305722845291084	0.000145032166714334	-1.07896233658358e-07	7.29284761117644e-06	3.01702334769754e-06
25	temnothorax	M	1	2	H31T001R002	0.471466211097009	0.263471393529862	0.000320617165342593	2.2151309044938e-05	2.22007226820359e-06	4.54217960069864e-06
26	temnothorax	M	1	2	H31T001R003	0.497434866035928	0.313726504777881	1.69657584461289e-05	6.52771075249267e-06	5.61363046908599e-06	1.98422954691023e-06
27	temnothorax	M	1	2	H31T001R008	0.744142808943714	0.405571126164569	0.000490232591594423	2.56590668159567e-05	5.24638503292647e-05	2.73793710305073e-05
28	temnothorax	M	1	2	H31T001R015	0.490907532713732	0.320256846127363	4.38272191741443e-05	3.73601348752082e-06	7.08153540704408e-06	-2.11111108376742e-07
29	temnothorax	M	1	2	H31T001R017	0.504392274437754	0.299962879391404	0.00044608391736674	-6.97443480875937e-05	7.62862284584095e-07	5.68212357009194e-07
30	temnothorax	M	1	2	H14T001R002	0.474690223631486	0.212240611008876	0.000236545777132971	-4.6436213919201e-05	5.756275570175e-06	3.90637089203061e-06
31	temnothorax	M	1	2	H14T001R005	0.527940735824949	0.286209644901778	-0.000118829659191846	-0.000104641438759214	1.17490732541991e-05	1.05761591647133e-05
32	temnothorax	M	1	2	H14T001R017	0.40378235075066	0.21255595264331	0.000426908804258762	1.37882812981699e-05	1.93413560258322e-05	1.06770582291102e-05
33	temnothorax	M	1	2	H14T001R024	0.630238340919784	0.331264940893481	-1.75128331857289e-05	-5.22941043393651e-05	2.4055093201834e-05	1.27165160165011e-05
34	temnothorax	M	1	2	H1T001R005	0.455531838460341	0.254363179190169	0.000392803705822938	-6.72522620362447e-05	5.57296260715241e-06	5.17199332543501e-06
35	temnothorax	M	1	2	H1T001R007	0.542786759219243	0.368287082262484	2.70951837006331e-05	3.64715418775176e-05	1.47562053039789e-06	1.80073806151011e-05
36	temnothorax	M	1	2	H1T001R010	0.537311739403971	0.295274608408092	2.84717050036323e-05	7.49592641244889e-05	1.04880281043342e-05	-1.73574430434335e-06
37	temnothorax	M	1	2	H1T001R012	0.549461669051049	0.350636772207336	0.000113111146049433	-4.58187496365328e-05	4.38770003980018e-06	7.80100973079943e-06
38	temnothorax	M	1	2	H36T001R005	0.509239275062699	0.289418253870151	0.000405849563966338	8.33636746456929e-05	3.54218796688583e-06	-3.22099943965905e-06
39	temnothorax	M	1	2	H36T001R011	0.443494129139882	0.253220242601305	4.49617378282403e-05	-1.93257210619631e-05	3.00023399488436e-06	7.03837102797613e-06
40	temnothorax	M	1	2	H36T001R013	0.586369930005999	0.406191491951429	0.000290224357407172	7.46120562325943e-05	1.19862511080222e-05	1.13648166717506e-05
41	temnothorax	M	1	3	H16T001R002	0.528567722767366	0.420712580171363	-0.000517868724053142	0.000323788639250572	1.90665121144962e-05	2.13218598040596e-05
42	temnothorax	M	1	3	H16T001R003	0.487575537235855	0.38968233074433	-0.000220060202909854	0.000273928499379923	1.77657745081002e-05	3.39772233245434e-05
43	temnothorax	M	1	3	H9T001R003	0.62502248633779	0.375444495236083	0.00046455185267254	0.000111172343481318	1.51730989849181e-05	1.75365661561877e-05
44	temnothorax	M	1	3	H31T001R001	0.499889938232384	0.303273593288635	0.000161923371599417	-1.60808176770183e-05	1.99300205862548e-05	1.06944543705125e-05
45	temnothorax	M	1	3	H31T001R002	0.462568920182401	0.260842794644909	0.000220853521339532	3.97150017568989e-05	1.45676998075079e-05	1.41748890861172e-05
46	temnothorax	M	1	3	H31T001R003	0.49140092293392	0.311776483426997	4.05777378099974e-05	1.04577015314753e-05	-4.10026843923665e-06	1.3658245337248e-05
47	temnothorax	M	1	3	H31T001R008	0.727328196407008	0.403200879176827	0.000497298266032686	8.02100827563624e-05	4.33271478359823e-05	2.70140514894589e-05
48	temnothorax	M	1	3	H31T001R015	0.484802001946172	0.319597081975413	5.34483992329586e-05	-3.22497250219724e-05	8.80075384121742e-06	4.32197899295922e-06
49	temnothorax	M	1	3	H31T001R017	0.496729716036724	0.298761820605042	0.00040961067009205	-8.82393525508561e-05	1.1863046242723e-05	8.99280328165099e-06
50	temnothorax	M	1	3	H14T001R002	0.468135356862069	0.210029832816178	0.000258135270175019	-8.09721514625743e-05	1.13333161310903e-05	9.17782507331088e-06
51	temnothorax	M	1	3	H14T001R005	0.516515821513091	0.284515809909354	-0.000124505433385576	-0.000149899484875052	7.6563440833716e-06	5.12887395662619e-06
52	temnothorax	M	1	3	H14T001R017	0.398738019973008	0.211016084966238	0.000412791091560134	-1.24007257578371e-06	9.6981213230338e-06	1.17048480090049e-05
53	temnothorax	M	1	3	H14T001R024	0.621625304442982	0.330541848973706	6.9050503813595e-05	-9.62251219550213e-07	1.51516273757844e-05	1.69381311499563e-05
54	temnothorax	M	1	3	H1T001R005	0.445429987516457	0.251691958892997	0.000350448514587094	-4.09531019375407e-05	9.020058436417e-06	9.31070006176003e-06
55	temnothorax	M	1	3	H1T001R007	0.536784761101839	0.364951207417589	0.000105522833245074	6.40279259818791e-05	1.57121102434063e-05	1.23604931929108e-05
56	temnothorax	M	1	3	H1T001R010	0.521278835838909	0.292065484065773	-2.00151912603685e-05	7.60703750714911e-05	1.8564596307459e-05	1.01897092216627e-05
57	temnothorax	M	1	3	H1T001R012	0.541301298697526	0.349396849860406	0.000149174879704947	-7.05619213410935e-05	3.92107802338184e-06	1.49910536735144e-05
58	temnothorax	M	1	3	H36T001R005	0.499385183669783	0.287340340354888	0.000227983292874484	-1.68972324139533e-05	1.01997668553001e-05	2.25043117236285e-05
59	temnothorax	M	1	3	H36T001R011	0.436751800683604	0.251207585823816	5.20951044903393e-05	-2.0560025727409e-05	-1.66646080509656e-06	6.23589171220066e-06
60	temnothorax	M	1	3	H36T001R013	0.579873783041299	0.40444198387055	0.000243810249276905	2.23602397696368e-05	6.22522796491271e-06	1.04462609894803e-05
61	temnothorax	M	1	4	H16T001R002	0.521170255110241	0.415344132411634	-0.000469806047995953	0.000515503478954111	1.582721664227e-05	1.52435007962164e-05
62	temnothorax	M	1	4	H16T001R003	0.481329857586813	0.385972401492433	-0.000181441607859088	0.000307257070049563	2.9799438313697e-05	2.6331682501705e-05
63	temnothorax	M	1	4	H9T001R003	0.617629374239048	0.37439397192274	0.000492272380582603	0.000173011756572037	3.95077932263992e-05	4.33685945064656e-05
64	temnothorax	M	1	4	H31T001R001	0.495645984523826	0.302323303418519	0.000205114096866564	5.79988386729485e-05	2.02551368442796e-05	3.05448972169292e-05
65	temnothorax	M	1	4	H31T001R002	0.458932058160454	0.259300783897743	0.000208289398688981	8.91406135468413e-05	1.56704134565112e-05	1.04761263826362e-05
66	temnothorax	M	1	4	H31T001R003	0.489144753530693	0.31142206496572	2.89666498386031e-05	0.000102080720362607	1.73045537620074e-05	2.64326514952936e-05
67	temnothorax	M	1	4	H31T001R008	0.719543878495193	0.402429211006701	0.000586875014985784	1.30096887275343e-05	6.70473516725364e-05	4.32640960422918e-05
68	temnothorax	M	1	4	H31T001R015	0.482981328969095	0.319852561526159	6.96468836737014e-05	-9.31374393350073e-06	1.47091575792619e-05	2.13437864145169e-05
69	temnothorax	M	1	4	H31T001R017	0.494231162618432	0.298316066067174	0.000380908262646891	-4.21151260911172e-05	2.85838001808102e-05	1.82130350841749e-05
70	temnothorax	M	1	4	H14T001R002	0.464142172254162	0.208824682790203	0.000185758634247645	-8.37985630381255e-05	6.2642923229725e-06	1.69320229475936e-05
71	temnothorax	M	1	4	H14T001R005	0.509719914616279	0.282972460049257	-0.000159360368884205	-0.00020830071442989	3.83660274438884e-05	2.56631023015127e-05
72	temnothorax	M	1	4	H14T001R017	0.397403271036124	0.2100247712116	0.000389681147161962	-2.77501064242801e-05	2.30717517331391e-05	7.08503789870887e-06
73	temnothorax	M	1	4	H14T001R024	0.619421660733826	0.330815091122456	6.96900565953403e-05	1.82170589210661e-05	4.49504702244098e-05	1.91816297010508e-05
74	temnothorax	M	1	4	H1T001R005	0.441174365952859	0.250620769231351	0.000251950136246331	-2.45974643237123e-05	2.1037396607426e-05	2.45677531759929e-05
75	temnothorax	M	1	4	H1T001R007	0.532272761131783	0.364092835401441	0.000117229657865154	0.000177103530755385	1.70575018628482e-05	1.70864251380404e-05
76	temnothorax	M	1	4	H1T001R010	0.512845778487498	0.291760835937046	-1.2143721465917e-05	2.19450986725431e-05	6.29002631847126e-05	2.10771636408085e-05
77	temnothorax	M	1	4	H1T001R012	0.537601403322515	0.34896698871053	0.000156007754534846	-9.81413759425215e-05	5.67117015901615e-06	2.30314776065223e-05
78	temnothorax	M	1	4	H36T001R005	0.493454990092682	0.28665768251257	0.000268241843732905	-5.64660842131771e-05	2.21518869630754e-05	2.01763812230039e-05
79	temnothorax	M	1	4	H36T001R011	0.433491448990374	0.25003985060033	8.17630596074822e-06	-4.13048912933342e-05	1.18558301049714e-05	1.49340215944849e-05
80	temnothorax	M	1	4	H36T001R013	0.578342544520844	0.404049361760327	0.00020453997149318	1.69391626528856e-06	1.52621739993788e-05	1.34775934931883e-05
81	temnothorax	M	1	5	H16T001R002	0.521047917749101	0.414552728554428	-0.000462072060225701	0.000580252123765388	3.90362604309172e-05	3.76320530995521e-05
82	temnothorax	M	1	5	H16T001R003	0.480992323980042	0.386217085068873	-0.000219907647241378	0.000393425658492358	4.55651345876845e-05	4.40606680088454e-05
83	temnothorax	M	1	5	H9T001R003	0.613551457761916	0.37367446796172	0.000579465913383465	0.000163797279429896	5.43894800117112e-05	0.000109704531098553
84	temnothorax	M	1	5	H31T001R001	0.493592330285244	0.301667039732848	0.000225868669669337	0.000119082427981489	5.2972362389352e-05	2.54996566408239e-05
85	temnothorax	M	1	5	H31T001R002	0.456617304827377	0.258206071765528	0.000151593824240999	0.000124716611243784	4.56736684423275e-05	6.27609960408482e-05
86	temnothorax	M	1	5	H31T001R003	0.48766079030063	0.311114495435978	1.93074278153873e-05	8.04894692988297e-05	3.25317267535866e-05	4.92790167354884e-05
87	temnothorax	M	1	5	H31T001R008	0.716088057012099	0.401605232228196	0.000743157709688708	9.88919751639443e-05	0.000124864142727365	0.000109016407143457
88	temnothorax	M	1	5	H31T001R015	0.481545398939109	0.320368124494393	9.1532582420688e-05	-5.74651006554827e-05	4.00262847866578e-05	2.09294504064226e-05
89	temnothorax	M	1	5	H31T001R017	0.492842614068074	0.297629689306929	0.000379444897745438	-4.62943845093021e-05	3.61845240208894e-05	3.43027517167165e-05
90	temnothorax	M	1	5	H14T001R002	0.462118737428346	0.208157664386536	0.000113807296081127	-9.66483834944559e-05	4.29586653593061e-05	4.48593020754901e-05
91	temnothorax	M	1	5	H14T001R005	0.505726868452668	0.282196219468256	-0.000116252898532768	-0.000173202599135581	4.34224871461089e-05	2.70154470667117e-05
92	temnothorax	M	1	5	H14T001R017	0.396728320990201	0.209814588984759	0.000357948203284351	-3.4521902526608e-05	4.93223192381341e-05	1.12418624380978e-05
93	temnothorax	M	1	5	H14T001R024	0.618133671431138	0.330559413224579	0.000145031009662037	0.000163757851255248	6.3358064289871e-05	5.1257975703336e-05
94	temnothorax	M	1	5	H1T001R005	0.438864908773052	0.2500742725897	0.00021141363410232	5.981260980069e-05	4.17183210107863e-05	2.53359323574643e-05
95	temnothorax	M	1	5	H1T001R007	0.530334887959613	0.363669001785519	0.000150706415701197	0.000221825172309805	4.51928288076365e-05	5.214238825516e-05
96	temnothorax	M	1	5	H1T001R010	0.509102066912764	0.291477675379792	8.81541517564085e-06	0.000111862435436579	6.2472781568667e-05	4.55270451397884e-05
97	temnothorax	M	1	5	H1T001R012	0.536140913252773	0.348746007030683	0.000274863884617671	4.93588018452938e-06	2.33284855248494e-05	4.58417419375232e-05
98	temnothorax	M	1	5	H36T001R005	0.490220172158696	0.286574046605448	0.000330468349345768	-6.02936383696965e-05	4.1897617615263e-05	4.28551232670813e-05
99	temnothorax	M	1	5	H36T001R011	0.431286568539361	0.249570302741702	5.18908940280258e-05	-4.6157356729476e-05	2.60654904267341e-05	2.29571890120338e-05
100	temnothorax	M	1	5	H36T001R013	0.575761743191978	0.40374835739099	0.000253358145549341	9.9915408193738e-06	4.46989408803965e-05	1.54863015567033e-05
101	temnothorax	M	1	6	H16T001R002	0.518554892813527	0.412057978031315	-0.000227286711939715	0.000476373930914806	8.6079946493149e-05	9.16731991484816e-05
102	temnothorax	M	1	6	H16T001R003	0.47821021738125	0.383956791293668	-0.000175173556545932	0.000302980123653443	8.68074258748414e-05	4.43720792680308e-05
103	temnothorax	M	1	6	H9T001R003	0.611727226196741	0.373001757423158	0.000786564206034984	0.000232720842934625	0.000109751431216338	0.000163719864925199
104	temnothorax	M	1	6	H31T001R001	0.491750032167976	0.300750591579182	0.000225018191359097	7.9397123534264e-05	6.80673884809497e-05	7.38784770699548e-05
105	temnothorax	M	1	6	H31T001R002	0.45463713074857	0.257224663040708	0.000168450045897385	0.000152335129278088	8.48533896644606e-05	6.73259114281333e-05
106	temnothorax	M	1	6	H31T001R003	0.486363365629873	0.310702730348793	-1.96456528211578e-05	0.000117140156734365	6.16241672523851e-05	3.76775814372747e-05
107	temnothorax	M	1	6	H31T001R008	0.710750790041164	0.400913778057886	0.000793050857509659	0.000350781408765952	0.000129352782164663	0.000183044335290149
108	temnothorax	M	1	6	H31T001R015	0.480358073908822	0.320119823803382	0.000120495863276923	6.04254886869451e-05	9.96903841436084e-05	5.74353675647621e-05
109	temnothorax	M	1	6	H31T001R017	0.491288511554813	0.297061145829374	0.000402967149069649	9.22419570642005e-05	8.29170407514224e-05	5.4784146369932e-05
110	temnothorax	M	1	6	H14T001R002	0.4600902427134	0.207165663394377	0.000220700448037928	-7.68201759896064e-05	9.39387472860801e-05	7.46940065944025e-05
111	temnothorax	M	1	6	H14T001R005	0.502479260321081	0.280423255249219	-1.92836819725742e-05	-0.000160965799407969	9.62814973593018e-05	0.000106597092398947
112	temnothorax	M	1	6	H14T001R017	0.395773015484965	0.20931542660967	0.000347396287387578	-1.29674356203034e-05	9.27786178239454e-05	4.51608679452156e-05
113	temnothorax	M	1	6	H14T001R024	0.61719302364851	0.330522188366331	0.000170060127309807	0.000239872818344444	0.00011525148012041	0.000106507774984945
114	temnothorax	M	1	6	H1T001R005	0.436749961301153	0.249187153895053	0.00025949053129523	0.000151090247824254	7.18661861548678e-05	6.05083980519818e-05
115	temnothorax	M	1	6	H1T001R007	0.528395643347055	0.363092020240191	0.000191180527027849	0.000318867781216599	8.06867912606348e-05	8.91791737229133e-05
116	temnothorax	M	1	6	H1T001R010	0.505848544188555	0.291161942111259	-6.98139171676848e-05	6.1915243291907e-05	9.56747919824832e-05	0.000106621472003804
117	temnothorax	M	1	6	H1T001R012	0.535128003270458	0.348023593505106	0.000263651545073094	3.88164868455484e-05	6.52666475809044e-05	7.1639976318705e-05
118	temnothorax	M	1	6	H36T001R005	0.48721917605908	0.286216701943323	0.000298396256968174	1.57917339122123e-05	0.000109273541909777	0.000112990083173511
119	temnothorax	M	1	6	H36T001R011	0.430194883409255	0.249032111364378	0.000101389933025706	-4.88869336280492e-05	8.79673590630935e-05	3.55641613936885e-05
120	temnothorax	M	1	6	H36T001R013	0.573809752287298	0.402173084023512	0.000364028048232297	4.53097426133252e-05	0.000102018400243707	7.3500629251616e-05
121	temnothorax	M	1	7	H16T001R002	0.517716177266254	0.411186569425006	-0.00038292692287159	0.000777228494055465	0.000123286542605989	0.000140260762212813
122	temnothorax	M	1	7	H16T001R003	0.4774065118772	0.383389736546412	4.11118060362822e-05	0.000481399039957113	0.000182912619166098	9.15171173191613e-05
123	temnothorax	M	1	7	H9T001R003	0.610574341070276	0.373159072184471	0.000975165890818541	0.00058144576175565	0.000245652021300761	0.000314695809981264
124	temnothorax	M	1	7	H31T001R001	0.491334767211288	0.300832446925917	0.000345494601352143	0.000161933300833866	0.000145898837481898	0.000146797146468028
125	temnothorax	M	1	7	H31T001R002	0.453651071669937	0.256805530271886	0.000216374676969342	0.000269373787367849	0.000187368942181463	0.000130389572274417
126	temnothorax	M	1	7	H31T001R003	0.485507052558179	0.310461994109037	0.000128100632333233	0.000325731502049057	0.000117378266097848	0.000166753993365042
127	temnothorax	M	1	7	H31T001R008	0.708907598756611	0.400797524475926	0.000966008093754097	0.000368168147467737	0.000365641056309827	0.000412012952627784
128	temnothorax	M	1	7	H31T001R015	0.479993869797276	0.319784815645274	0.00012501796639364	0.000106995178634644	0.000187577822349379	0.000102347117441964
129	temnothorax	M	1	7	H31T001R017	0.491300792689378	0.297000169076879	0.000503093474215414	0.000128114708540661	0.000217336069284	0.000164412517839676
130	temnothorax	M	1	7	H14T001R002	0.458476930551493	0.206823359363953	0.000445700637340316	-0.000159666341876397	0.000149696913990391	0.000132040567047788
131	temnothorax	M	1	7	H14T001R005	0.502008947965452	0.279902550008641	-6.36866532945829e-06	7.30487928562707e-05	0.000163456795823938	0.000202868872288272
132	temnothorax	M	1	7	H14T001R017	0.394952123443239	0.20891227847422	0.000406880540156855	0.000112701758637266	0.000176214933163987	7.64679220574127e-05
133	temnothorax	M	1	7	H14T001R024	0.616719346072198	0.33068628708138	0.000310976984691536	0.000451412720765362	0.00022391003721834	0.000260140443938142
134	temnothorax	M	1	7	H1T001R005	0.435640987500921	0.249068959646962	0.000389658769097626	0.000198482151167832	0.000173925642525728	0.000139774324062023
135	temnothorax	M	1	7	H1T001R007	0.527347319059136	0.362899934282769	0.000325353646412434	0.000256813525406489	0.000177676434646716	0.000151685851029988
136	temnothorax	M	1	7	H1T001R010	0.504222179554027	0.290838862435674	-7.03448271953328e-05	0.000202218487810174	0.000230040895588235	0.000208259334945874
137	temnothorax	M	1	7	H1T001R012	0.534453814578517	0.347874045769225	0.000420470627652373	0.00013556356169186	0.000147630377950691	0.000197571221240037
138	temnothorax	M	1	7	H36T001R005	0.484992424380863	0.286009978018912	0.000380676245076632	-2.8676758546456e-05	0.000167223140717144	0.00022449167610888
139	temnothorax	M	1	7	H36T001R011	0.429341500926544	0.248649416689587	0.000214893422214027	-1.82912602809887e-05	0.000177217822912002	0.000123929622882398
140	temnothorax	M	1	7	H36T001R013	0.573132618919481	0.401795422759446	0.000305531073316439	0.000158392579014233	0.000198475534488999	0.000124951663174267
141	temnothorax	M	1	8	H16T001R002	0.517624921377135	0.410654214913633	0.000121738634220683	0.00109562395265747	0.000383386587323977	0.000272678415265675
142	temnothorax	M	1	8	H16T001R003	0.475696637442503	0.382680695730368	0.000184009910673864	0.000558967489152913	0.000403973663277965	0.00026186140148604
143	temnothorax	M	1	8	H9T001R003	0.609160777602122	0.371945430075108	0.0020084147730815	0.00094807077027983	0.000471914187218411	0.00063319846214456
144	temnothorax	M	1	8	H31T001R001	0.490490704941833	0.300217352416451	0.000621214856528291	0.000342306398730256	0.00028882335304225	0.000314791947345081
145	temnothorax	M	1	8	H31T001R002	0.452360595119192	0.256678153330033	0.000208302925887053	0.000490001615728765	0.000351327161647903	0.000333034526588984
146	temnothorax	M	1	8	H31T001R003	0.484629853796622	0.31037870800886	0.00023908988665656	0.000544199171836717	0.000369272352772189	0.000199668803801722
147	temnothorax	M	1	8	H31T001R008	0.706838014414045	0.399953531016169	0.000995886136689537	0.000377701623338561	0.00056008111179827	0.000860721440441743
148	temnothorax	M	1	8	H31T001R015	0.479956839797413	0.319587894130032	0.000130316413740388	0.00031690105155316	0.000399966571971162	0.000249055032071774
149	temnothorax	M	1	8	H31T001R017	0.49076582166584	0.296769801580001	0.000516581658334301	0.000294869389138505	0.000390783787786725	0.00035520498314493
150	temnothorax	M	1	8	H14T001R002	0.457366204688384	0.206436208625466	0.00049124538341382	-3.33624861872961e-05	0.000339875169331066	0.000212563598608809
151	temnothorax	M	1	8	H14T001R005	0.501306729401719	0.279756576283973	0.000427330409070438	0.00028053395690599	0.000409672344958596	0.000367669880626582
152	temnothorax	M	1	8	H14T001R017	0.394366434369561	0.208629539775613	0.000361951158252605	0.000213068724568004	0.000276138479170193	0.000129925247175506
153	temnothorax	M	1	8	H14T001R024	0.616095073457086	0.330362261985598	0.000378246992313873	0.000643545860781518	0.000467014906396232	0.000495266557418362
154	temnothorax	M	1	8	H1T001R005	0.434743689082981	0.248606073751316	0.000720780796450498	0.000237919454636678	0.000309389443261913	0.000299580349109229
155	temnothorax	M	1	8	H1T001R007	0.526716193488448	0.36279980732617	0.000750735634323293	0.000341409079651674	0.000387609777628379	0.000345823339981645
156	temnothorax	M	1	8	H1T001R010	0.502156989779581	0.290661561795824	0.000131316685401771	0.000332260938699686	0.000431061458506628	0.000468549164449482
157	temnothorax	M	1	8	H1T001R012	0.534093803626243	0.347760112576779	0.00066996578929067	0.000539470218465502	0.000367828839844945	0.000346327644700005
158	temnothorax	M	1	8	H36T001R005	0.483654497975933	0.285816262234803	0.00056625962826674	0.000235639818717255	0.000411296868980674	0.000429737555636699
159	temnothorax	M	1	8	H36T001R011	0.428699497574464	0.248185423422562	0.000428947803293231	-2.73859075733379e-05	0.000275390816414393	0.000217480101182235
160	temnothorax	M	1	8	H36T001R013	0.571883830740833	0.401563561892221	0.000476026022616891	0.000422713764539591	0.000416357422556101	0.000366661025485604
161	temnothorax	M	1	9	H16T001R002	0.516159374320121	0.409113055728744	0.000792807868246976	0.00137793424679555	0.000647353943671928	0.000565996741892867
162	temnothorax	M	1	9	H16T001R003	0.474256917216097	0.380666900015469	0.000772855882300625	0.00101001774123298	0.000586767373860419	0.000511797814796257
163	temnothorax	M	1	9	H9T001R003	0.608105067461211	0.370295245055515	0.00293065207759151	0.0017750168849686	0.000895769940802912	0.00128646889237119
164	temnothorax	M	1	9	H31T001R001	0.489393052201766	0.300329759458104	0.00120090291450751	0.000533350095040809	0.000573327666485782	0.000677724686821349
165	temnothorax	M	1	9	H31T001R002	0.451656812227016	0.256126919433135	0.00044458637444771	0.000613128963808818	0.000702747243640292	0.00058503891498114
166	temnothorax	M	1	9	H31T001R003	0.484075019197103	0.310188705425161	0.000715833721434844	0.000956624175139681	0.000594183732952318	0.000578488494757514
167	temnothorax	M	1	9	H31T001R008	0.705472710797055	0.398773639712333	0.00163709331548922	0.00119050407952468	0.00097208470983931	0.00172467852172642
168	temnothorax	M	1	9	H31T001R015	0.479027977765299	0.318972052071048	0.000453536483274624	0.000551010531790009	0.000592237832937604	0.000483873828041659
169	temnothorax	M	1	9	H31T001R017	0.489453655472101	0.2963334540833	0.000604044384613835	0.00102511039625528	0.000828638136952447	0.000696945956365792
170	temnothorax	M	1	9	H14T001R002	0.456099112925921	0.205436237968601	0.000664639992636475	0.000406896490743409	0.00067895583232296	0.000585618209428229
171	temnothorax	M	1	9	H14T001R005	0.499936723055137	0.278497393205122	0.00073952567296155	0.000574985132440851	0.000694405806198921	0.000830954131218524
172	temnothorax	M	1	9	H14T001R017	0.393459930136462	0.208024942218825	0.000411722866584879	0.000351768374467877	0.000471598983185323	0.000223017539680163
173	temnothorax	M	1	9	H14T001R024	0.61520005468189	0.330163430155235	0.000699178199118963	0.000797726630793854	0.000760111170217291	0.00104760133145214
174	temnothorax	M	1	9	H1T001R005	0.434214294627301	0.248189558798363	0.00147813635597077	0.00033146630509277	0.000491194161244362	0.000578889711195622
175	temnothorax	M	1	9	H1T001R007	0.525851030593756	0.361921551967722	0.000966734582454897	0.000650965829283007	0.000735709390555995	0.000626243328394185
176	temnothorax	M	1	9	H1T001R010	0.500040829608465	0.290283170924978	0.00034772176571634	0.000454731684208571	0.000800148292649377	0.00109694145487092
177	temnothorax	M	1	9	H1T001R012	0.533571410893272	0.347421066484177	0.000965440086389448	0.000863865524466133	0.00074654082084742	0.000786705572779145
178	temnothorax	M	1	9	H36T001R005	0.482397974342873	0.285480239775398	0.000712727540864164	0.000600592773335011	0.000763783710535474	0.000911020691727974
179	temnothorax	M	1	9	H36T001R011	0.427906939912348	0.247721606212323	0.000712566083769578	9.84216649001195e-05	0.000581732780210323	0.000453415012332447
180	temnothorax	M	1	9	H36T001R013	0.570440385548753	0.400823702333998	0.00100085577233298	0.00113440036090378	0.000750498774866051	0.000758705893424361
181	temnothorax	M	1	10	H16T001R002	0.515466511071755	0.408528571044941	0.00173786508589171	0.00226351354612222	0.00110496634946594	0.00129581596912612
182	temnothorax	M	1	10	H16T001R003	0.473664778623407	0.379983238978945	0.00169118549970652	0.00179939061424109	0.00101905147530152	0.00108072549747063
183	temnothorax	M	1	10	H9T001R003	0.606085561696321	0.36838000940293	0.00467262589248824	0.00319527950038449	0.0012980161163742	0.00312356171370843
184	temnothorax	M	1	10	H31T001R001	0.488675585297177	0.298798086747646	0.00165405170034907	0.00153323186183369	0.00106668351307745	0.00156072724242386
185	temnothorax	M	1	10	H31T001R002	0.450639834496277	0.255706477296856	0.000559064332219884	0.00104563331062146	0.000999597700447951	0.00126504568851222
186	temnothorax	M	1	10	H31T001R003	0.483102165952854	0.30911521204695	0.00129582882967647	0.00108427515530063	0.00101142869274069	0.00102669048993843
187	temnothorax	M	1	10	H31T001R008	0.702918367781207	0.396986372013108	0.00254065024238882	0.00352195007321913	0.00161729326905249	0.00355678409030408
188	temnothorax	M	1	10	H31T001R015	0.478175263723977	0.318396165672927	0.000592120093772063	0.00149139488757159	0.00100116855819549	0.00108665721539178
189	temnothorax	M	1	10	H31T001R017	0.488537384475364	0.296331204281224	0.000867434447643176	0.0018258658509195	0.0011092645524594	0.00136366511985323
190	temnothorax	M	1	10	H14T001R002	0.455722376920978	0.204803916668721	0.00123320826112011	0.000785905013252612	0.00102963115546943	0.00109817425308354
191	temnothorax	M	1	10	H14T001R005	0.498984347052258	0.277257683753855	0.00132241340436127	0.00128161947167004	0.00123816401844107	0.00195616421501969
192	temnothorax	M	1	10	H14T001R017	0.392852617439351	0.207631491243215	0.000485836096583192	0.000569915481695133	0.000860803682409707	0.000492813532305561
193	temnothorax	M	1	10	H14T001R024	0.613069340660129	0.329472890093523	0.000906516762564929	0.0017531420618334	0.00125003839968229	0.00193467825300286
194	temnothorax	M	1	10	H1T001R005	0.433011529313618	0.247332675622447	0.00179050226493337	0.000976457619411527	0.000855768131740849	0.00115142010203355
195	temnothorax	M	1	10	H1T001R007	0.525267345129338	0.361117407862326	0.00132955277881577	0.00173440196564314	0.00112527298398638	0.00139355061294451
196	temnothorax	M	1	10	H1T001R010	0.498895941166963	0.289732748345999	0.000952577608347348	0.00184672483693405	0.00115032796195683	0.00238253770108584
197	temnothorax	M	1	10	H1T001R012	0.531965675813417	0.346687023434211	0.00121765198817004	0.00170251488068255	0.00121114894180579	0.00163476689839631
198	temnothorax	M	1	10	H36T001R005	0.48141065943849	0.284744809159804	0.00137978725744659	0.00123626758248622	0.00107471597974761	0.00187461848840673
199	temnothorax	M	1	10	H36T001R011	0.426925552366229	0.246498270035196	0.000845752911509253	0.000580369719191928	0.000993138461114415	0.00111078040563296
200	temnothorax	M	1	10	H36T001R013	0.56990237095754	0.399874508556537	0.00193620375600133	0.00246377677560514	0.00106645076568292	0.00162141909088303
201	temnothorax	M	1	11	H16T001R002	0.513479617996366	0.405243186514919	0.00291436167357313	0.00341658252416141	0.00138975237924833	0.0022350894113848
202	temnothorax	M	1	11	H16T001R003	0.472062878778664	0.377384894106919	0.00298240157609312	0.00346220176592807	0.00120457130702146	0.0017413179230234
203	temnothorax	M	1	11	H9T001R003	0.603268854674015	0.364563162426711	0.00576016336792609	0.00636250589308634	0.00186468967111177	0.00545713266652884
204	temnothorax	M	1	11	H31T001R001	0.487599794809003	0.297262418188819	0.0022793572983856	0.00338423028444056	0.00129961172701248	0.00268697870611627
205	temnothorax	M	1	11	H31T001R002	0.449463675596297	0.25538922674472	0.00103567726666303	0.00186885397315199	0.00138316175192454	0.00218741962637272
206	temnothorax	M	1	11	H31T001R003	0.48221839805307	0.307897488185035	0.00202080810505154	0.00154268089455602	0.00175460023800574	0.00208224706758674
207	temnothorax	M	1	11	H31T001R008	0.698748592685146	0.395108400606437	0.0037825810262519	0.0079105421103974	0.00213171685811617	0.00724475274627723
208	temnothorax	M	1	11	H31T001R015	0.476684574350125	0.317738959928099	0.00129519027886434	0.00281289980513792	0.00142099107529989	0.00194575567837622
209	temnothorax	M	1	11	H31T001R017	0.486967570562499	0.295325973808169	0.00116593697612863	0.00400663791540874	0.00159818085945683	0.00239690500779323
210	temnothorax	M	1	11	H14T001R002	0.454220231443767	0.203281550260687	0.00180260865425373	0.00155734203316439	0.00128211470100522	0.00194957531911983
211	temnothorax	M	1	11	H14T001R005	0.496322656341141	0.275009719990902	0.0021053904648151	0.00294343131633295	0.00150155402684485	0.00358749874604447
212	temnothorax	M	1	11	H14T001R017	0.39223064494184	0.207036823011353	0.00070236344479067	0.00088068126685083	0.0013817471875556	0.0008953059348434
213	temnothorax	M	1	11	H14T001R024	0.610315588441228	0.328723615300785	0.00120678615515711	0.0029008619340175	0.0019141747733548	0.00386231265840648
214	temnothorax	M	1	11	H1T001R005	0.431518555950429	0.245340079772518	0.00231066050922177	0.0016871436277896	0.00108867621400781	0.00208125108102939
215	temnothorax	M	1	11	H1T001R007	0.523474397014955	0.360046653700843	0.00193663534388065	0.00333566380293114	0.00158924476629308	0.00263316295549336
216	temnothorax	M	1	11	H1T001R010	0.496747617566523	0.288823342292226	0.00118197012430677	0.00357572882913456	0.00155617968047865	0.00426658370944341
217	temnothorax	M	1	11	H1T001R012	0.530896209570109	0.345520234338657	0.00182839407090102	0.00372619008602606	0.00162535052014425	0.00302962477610208
218	temnothorax	M	1	11	H36T001R005	0.47969035012002	0.28343254648795	0.00147869971691171	0.00291259612773866	0.00117390684887551	0.00309365191740971
219	temnothorax	M	1	11	H36T001R011	0.42546557622348	0.245422186597075	0.00141269576749668	0.00160738776744688	0.00117173728683695	0.00181899474984517
220	temnothorax	M	1	11	H36T001R013	0.568750659638587	0.398237400485577	0.0030923618626016	0.00429527262512067	0.00162131618057719	0.00306233152198054
221	temnothorax	M	1	12	H16T001R002	0.511529138858076	0.402270084642392	0.00396440769455957	0.0055089008002961	0.00169850950777648	0.00346262832114141
222	temnothorax	M	1	12	H16T001R003	0.470897443583638	0.374916187341941	0.00391170183226099	0.00640735157136414	0.00175511605115427	0.00315072515164931
223	temnothorax	M	1	12	H9T001R003	0.596600529763043	0.360006367817863	0.00631125299153797	0.00983024994112129	0.00216315822813507	0.00848170848316804
224	temnothorax	M	1	12	H31T001R001	0.485174051186003	0.294334319148302	0.00259889575134164	0.00518559383615816	0.00157954747141361	0.00394051869915477
225	temnothorax	M	1	12	H31T001R002	0.447341015869453	0.254774010481539	0.00146459473163583	0.00372223206640482	0.00178906630256582	0.00340852743618492
226	temnothorax	M	1	12	H31T001R003	0.479856462709247	0.305664640329463	0.00224471823307073	0.00299777951784994	0.00161488804520139	0.00304229955878281
227	temnothorax	M	1	12	H31T001R008	0.690009616118295	0.391921722986762	0.00450836297558143	0.0138707240236037	0.00261498317108561	0.0102013578215412
228	temnothorax	M	1	12	H31T001R015	0.475054704448533	0.316169940271014	0.00130077754713431	0.00435109115926156	0.00167647758532176	0.00278233932807276
229	temnothorax	M	1	12	H31T001R017	0.483906812320083	0.293853365010651	0.00216404619537798	0.00641677009862728	0.00180778766865431	0.00400804214565508
230	temnothorax	M	1	12	H14T001R002	0.451405177520177	0.200935731988745	0.00186601802794063	0.00281669092404922	0.00149150862639767	0.00294261926329763
231	temnothorax	M	1	12	H14T001R005	0.492740669271939	0.271989280520016	0.0022756778420724	0.00499468923429741	0.00199556959322702	0.00577826772568171
232	temnothorax	M	1	12	H14T001R017	0.390790625747413	0.206354664990053	0.000645368183186677	0.00136111935224028	0.00146320460563988	0.00146518190856373
233	temnothorax	M	1	12	H14T001R024	0.605450428775333	0.327840337871927	0.00147669820188257	0.00453903706173469	0.00221559997101726	0.00577192110252183
234	temnothorax	M	1	12	H1T001R005	0.429307718039966	0.243048160184048	0.0026397878630268	0.00246683426782263	0.00136433450679811	0.00285258490426584
235	temnothorax	M	1	12	H1T001R007	0.52078115235542	0.357842279176765	0.00282497356115319	0.00556338471984933	0.00184951537730649	0.00393838972165416
236	temnothorax	M	1	12	H1T001R010	0.49187497455455	0.287204503007052	0.00141189905121999	0.00570912881291354	0.00194244812446441	0.00667601957800782
237	temnothorax	M	1	12	H1T001R012	0.52782998942647	0.34363942925747	0.00285113972600846	0.00599366988743018	0.00191949715891151	0.00443117906232733
238	temnothorax	M	1	12	H36T001R005	0.476556617573166	0.282309643915761	0.00187499570085165	0.00544556690492002	0.00211876994509284	0.00558432702242385
239	temnothorax	M	1	12	H36T001R011	0.422098634154032	0.243493194006846	0.00193810454689971	0.00269069101178383	0.00142804184978216	0.00289827849870938
240	temnothorax	M	1	12	H36T001R013	0.56539925097917	0.394986904626348	0.00396342772519577	0.00747284925047227	0.00211830425667301	0.00516308605312419
241	temnothorax	M	1	13	H16T001R002	0.505945035872016	0.396234141956236	0.0039970142715641	0.00840031909789047	0.00191510583081041	0.00483045726911074
242	temnothorax	M	1	13	H16T001R003	0.466101402285211	0.36895801151182	0.00473064121837889	0.00833761341570122	0.00170229065869115	0.00410880737268752
243	temnothorax	M	1	13	H9T001R003	0.582188548534033	0.355354774505734	0.00659864604001389	0.0137590086412921	0.00234194911642776	0.0104447358314762
244	temnothorax	M	1	13	H31T001R001	0.478195309859926	0.291760568892451	0.00341221115454486	0.0075129752727578	0.00205000558527434	0.00534534007154363
245	temnothorax	M	1	13	H31T001R002	0.442608289325402	0.254112570254345	0.00178503724939873	0.00502645918701436	0.00204202522349012	0.00451368005990808
246	temnothorax	M	1	13	H31T001R003	0.475132147904276	0.303664832682049	0.00216495967313254	0.00455750142070304	0.0021102655749342	0.0046290618505953
247	temnothorax	M	1	13	H31T001R008	0.671611805753768	0.388391102558393	0.00536401927442295	0.0180833402730291	0.00314941159678571	0.0136086663409641
248	temnothorax	M	1	13	H31T001R015	0.47172324003419	0.314974484697409	0.0017312472844971	0.00566876539584768	0.00170686387847808	0.00384041127234526
249	temnothorax	M	1	13	H31T001R017	0.479342696179564	0.292796201401495	0.00244561677088612	0.00793997375715219	0.0019054078894442	0.00497516166001517
250	temnothorax	M	1	13	H14T001R002	0.446477083556392	0.199357655231118	0.00206856800419349	0.00435888881869175	0.00181626725402195	0.00443837015703152
251	temnothorax	M	1	13	H14T001R005	0.483394935981434	0.268553408068288	0.00306553709946973	0.00782032534407718	0.00251655667486708	0.00763675647951092
252	temnothorax	M	1	13	H14T001R017	0.389523034149503	0.205280264112799	0.000772916947467933	0.00185409783593646	0.00173713753029989	0.00205276408448919
253	temnothorax	M	1	13	H14T001R024	0.597571908524809	0.326999943887842	0.00171536756915753	0.00728918418751948	0.00245819953880715	0.00785357176840615
254	temnothorax	M	1	13	H1T001R005	0.423456946183613	0.240813121090223	0.00237461504967972	0.00441102994278584	0.00167315623285924	0.00413023603899917
255	temnothorax	M	1	13	H1T001R007	0.515392457220994	0.354875619078395	0.00341121889712182	0.00743927627703309	0.00219432523321457	0.005278913828804
256	temnothorax	M	1	13	H1T001R010	0.481283956905876	0.285884348600816	0.00152437068525627	0.00762214998458607	0.00226289184847733	0.008697215559211
257	temnothorax	M	1	13	H1T001R012	0.521013358418461	0.341299528629817	0.00371722492913983	0.00846054855135794	0.00217460123326992	0.00578311962707992
258	temnothorax	M	1	13	H36T001R005	0.469943558482113	0.280756634398783	0.00241459802687249	0.00834631017189179	0.00234560911915004	0.00725244198840746
259	temnothorax	M	1	13	H36T001R011	0.417300047517883	0.241612162502126	0.00183518167433008	0.00381539803697708	0.00205612239890005	0.00448641838685114
260	temnothorax	M	1	13	H36T001R013	0.55839033852675	0.391468775343007	0.00466336594395215	0.0111827831530581	0.0023302887668917	0.00658530075357376
261	temnothorax	M	1	14	H16T001R002	0.49640267470469	0.391702267157044	0.00492375005675377	0.0101585408540873	0.00254322693893389	0.00622056203855777
262	temnothorax	M	1	14	H16T001R003	0.457413092868268	0.364843434388941	0.00503731942484691	0.0101840407341893	0.0020603181405945	0.00493048394560051
263	temnothorax	M	1	14	H9T001R003	0.556246460095285	0.350715942509408	0.00663381487808224	0.0177152805915449	0.00301074113739507	0.012766902313414
264	temnothorax	M	1	14	H31T001R001	0.465771070994448	0.289542132185547	0.00382310064746257	0.00896654145724532	0.00266901942385368	0.00658646957449229
265	temnothorax	M	1	14	H31T001R002	0.432031798076885	0.252938229564596	0.00195646181298252	0.00627759217990389	0.00232206675114268	0.00533823624930106
266	temnothorax	M	1	14	H31T001R003	0.466148418801518	0.301261429697908	0.00206130549000375	0.00592591260383287	0.00205252787352609	0.00512416748061378
267	temnothorax	M	1	14	H31T001R008	0.638218050279055	0.384527563584126	0.00652464626226954	0.0215809949350042	0.00329657019283387	0.015430723118606
268	temnothorax	M	1	14	H31T001R015	0.464700910621113	0.313706715841084	0.00200037033235913	0.00702516670282988	0.00236612421135362	0.00517516393853804
269	temnothorax	M	1	14	H31T001R017	0.468941140360708	0.291217165995185	0.00271132231853843	0.00857717997395386	0.00264597372955503	0.00651918305529515
270	temnothorax	M	1	14	H14T001R002	0.438244528038048	0.196937438553887	0.00193799089398097	0.00510528206215725	0.00228779458625076	0.00581164531506964
271	temnothorax	M	1	14	H14T001R005	0.467820730043747	0.264706401771274	0.00355701762257694	0.00916545980602087	0.00246307935992596	0.00895776071697552
272	temnothorax	M	1	14	H14T001R017	0.386629864198322	0.204559955460119	0.00102711107314145	0.0020175021680195	0.00183932163496876	0.00263835770026046
273	temnothorax	M	1	14	H14T001R024	0.580769072904447	0.325865040393959	0.00222488557065473	0.0096460030695831	0.00301544842157517	0.0102459285718283
274	temnothorax	M	1	14	H1T001R005	0.411568062110519	0.238310527843933	0.00234365595094315	0.00548662580405485	0.00203880582505202	0.00480788204838345
275	temnothorax	M	1	14	H1T001R007	0.504503095756905	0.351436026205336	0.00410048879904044	0.0100931261603505	0.00223123626205109	0.0066720413974831
276	temnothorax	M	1	14	H1T001R010	0.461305287738598	0.283950546643935	0.00182020877107545	0.00981867881790631	0.00215491863916627	0.00915506293350593
277	temnothorax	M	1	14	H1T001R012	0.507703972798653	0.338824841905853	0.00389775166704677	0.00975502441244663	0.00257928120676912	0.00721875135355173
278	temnothorax	M	1	14	H36T001R005	0.452938282168604	0.278900247034542	0.00298490821009446	0.0104675143871579	0.00243988904545592	0.00794542376205177
279	temnothorax	M	1	14	H36T001R011	0.408383915082683	0.239405217873223	0.00211383077024295	0.00512716094879167	0.0018338866429399	0.00491180324955235
280	temnothorax	M	1	14	H36T001R013	0.543609396839764	0.387665376622296	0.00570312392425301	0.013716346411925	0.00208148731393424	0.00744765821656279
281	temnothorax	M	1	15	H16T001R002	0.481681508749412	0.383211113025715	0.00542337578688956	0.0110238975920364	0.00239205400480826	0.00657853785512213
282	temnothorax	M	1	15	H16T001R003	0.443937037252737	0.357081613478733	0.00517718507700656	0.0111003006531521	0.00203649655224019	0.00524894578852547
283	temnothorax	M	1	15	H9T001R003	0.517928110985892	0.345902958728712	0.00666356017568225	0.0175903354279007	0.00315596298833706	0.0131468618909071
284	temnothorax	M	1	15	H31T001R001	0.449690722195436	0.286564081604116	0.0040741568696751	0.00900727625714664	0.00284704465323715	0.00691674939139976
285	temnothorax	M	1	15	H31T001R002	0.418334168295918	0.251193405439322	0.00197939885221974	0.00659748516794207	0.00206189714537929	0.00497357488158335
286	temnothorax	M	1	15	H31T001R003	0.453009090683104	0.299572950460223	0.00172113847424779	0.0070794242360723	0.0026559755007896	0.00599110005047469
287	temnothorax	M	1	15	H31T001R008	0.591085689557303	0.37904445825276	0.0074137983684565	0.0220141933571091	0.00341522975291957	0.0157344529680605
288	temnothorax	M	1	15	H31T001R015	0.451473126475053	0.31196255359916	0.00221565537923752	0.00691751251508742	0.00245518455425211	0.00551910454258399
289	temnothorax	M	1	15	H31T001R017	0.45249421785232	0.288732262853549	0.00308434382754357	0.00789684335302401	0.00277464435016446	0.00644550609949654
290	temnothorax	M	1	15	H14T001R002	0.425444007803393	0.194280753788788	0.00154968030231928	0.00607003751412726	0.00253736233349535	0.00644001214347755
291	temnothorax	M	1	15	H14T001R005	0.442906401576267	0.260563851407006	0.00355875093664963	0.0104297436921151	0.00227359223530947	0.00847059267693777
292	temnothorax	M	1	15	H14T001R017	0.381706029076184	0.202980701215237	0.00111731139871552	0.0023630529263298	0.00227700409791144	0.00312439708945029
293	temnothorax	M	1	15	H14T001R024	0.553586260918497	0.324738481272417	0.00243283407807658	0.0114982603530611	0.00311236699066493	0.010681237904203
294	temnothorax	M	1	15	H1T001R005	0.397807437785338	0.236046513301641	0.00254261839584548	0.00584149001233299	0.00271426658739418	0.00576198109707719
295	temnothorax	M	1	15	H1T001R007	0.488563292886425	0.347180099673131	0.00458361339709051	0.0107470351195867	0.00289115001157959	0.00745675792448689
296	temnothorax	M	1	15	H1T001R010	0.431700510164604	0.282374239739992	0.00258089850870866	0.00978122219811477	0.00306074799149997	0.00946425729841
297	temnothorax	M	1	15	H1T001R012	0.489487807848549	0.335994681168586	0.00402258214126494	0.0102098193993336	0.00286583002422364	0.00724724994680253
298	temnothorax	M	1	15	H36T001R005	0.428433482618949	0.277141260636446	0.00337756289818903	0.010816690312586	0.00244397936563409	0.00778568971884197
299	temnothorax	M	1	15	H36T001R011	0.393217648684059	0.237103953868077	0.00168479976667704	0.00550485386260239	0.0021912438631716	0.00514965116353042
300	temnothorax	M	1	15	H36T001R013	0.521725340974839	0.381608507344416	0.005936960724162	0.0153497188054084	0.00248232893672291	0.0091637126209459
301	temnothorax	M	1	16	H16T001R002	0.46558727244008	0.3774812881391	0.00573817015859088	0.010383283383422	0.00254818644429958	0.00677844432327507
302	temnothorax	M	1	16	H16T001R003	0.431069093297243	0.35282479933292	0.00618026166711975	0.0106263430996427	0.00236576108961859	0.00544611701363911
303	temnothorax	M	1	16	H9T001R003	0.47742163162367	0.34133270026204	0.00706025826996116	0.0158417725349512	0.00338884690294101	0.0118092439694607
304	temnothorax	M	1	16	H31T001R001	0.430843059928979	0.284188118688275	0.00389767659545481	0.00867305781009953	0.00302743109189168	0.00681670478512755
305	temnothorax	M	1	16	H31T001R002	0.405319095113838	0.24983154164204	0.00175887333777863	0.0067303768157072	0.00257484796523114	0.00526611658342641
306	temnothorax	M	1	16	H31T001R003	0.438743321631463	0.297966830702254	0.00219030912083389	0.00786212921476589	0.00309023858224165	0.00623390392562755
307	temnothorax	M	1	16	H31T001R008	0.539396702770213	0.374307611563583	0.00841399585639426	0.0187312800741784	0.00461328479821894	0.0153698698676126
308	temnothorax	M	1	16	H31T001R015	0.437586100788366	0.309790254961144	0.00259642136416492	0.0066416263906669	0.00265125635496629	0.00563217159712344
309	temnothorax	M	1	16	H31T001R017	0.436273220943339	0.285725443152538	0.0030014826980599	0.0078061004090199	0.00291986174353997	0.0062421362204405
310	temnothorax	M	1	16	H14T001R002	0.409216809371178	0.192988826464825	0.00154596830861818	0.00600067662972465	0.00231613297943353	0.00658438359104223
311	temnothorax	M	1	16	H14T001R005	0.417189962136373	0.256241491301207	0.00315849447328719	0.00975928421894861	0.00271726924432304	0.00831868559044802
312	temnothorax	M	1	16	H14T001R017	0.376239185292473	0.202430145645711	0.00131574604575343	0.00294879089853597	0.00225624940828946	0.00349122407630611
313	temnothorax	M	1	16	H14T001R024	0.522676785190537	0.322757188733139	0.00280603852299515	0.0109782255477934	0.0034763147955374	0.0105697995459127
314	temnothorax	M	1	16	H1T001R005	0.381621395596122	0.23434799663062	0.00230278273707473	0.00570852997568003	0.00242100740212372	0.00513039757045356
315	temnothorax	M	1	16	H1T001R007	0.470715756930146	0.344126473980346	0.00499068379957734	0.0103618545361509	0.00305017027630186	0.00762574609942764
316	temnothorax	M	1	16	H1T001R010	0.402429854630224	0.280087869669559	0.00304012269145502	0.0083549028451997	0.00297977574898275	0.00827285116827848
317	temnothorax	M	1	16	H1T001R012	0.47064650248384	0.332561146336815	0.00437510657664318	0.00975498700502283	0.00304420055493475	0.00705005661286882
318	temnothorax	M	1	16	H36T001R005	0.405159023424465	0.274781065127659	0.00347049236985719	0.00964861182237519	0.00268057212962536	0.00712631563551547
319	temnothorax	M	1	16	H36T001R011	0.380279899020342	0.235763579664863	0.00189983900831605	0.00616235238575363	0.00258240974670063	0.00523751991218769
320	temnothorax	M	1	16	H36T001R013	0.496836008155286	0.376933712339454	0.00626754966432908	0.0155209799465364	0.0026867177256968	0.00941017038328012
321	temnothorax	M	1	17	H16T001R002	0.448024075848826	0.369437828621189	0.00642785735243582	0.0098084252208572	0.00284661767713903	0.00697687241339898
322	temnothorax	M	1	17	H16T001R003	0.416181291981971	0.345477317187939	0.00626831532193113	0.0100681336487857	0.00266944694978836	0.00547634527960848
323	temnothorax	M	1	17	H9T001R003	0.439734895022878	0.335878245161642	0.00728897451929811	0.0141146302623316	0.00352038765477565	0.0102935251920979
324	temnothorax	M	1	17	H31T001R001	0.413666691314144	0.281134011281517	0.00385640486669691	0.00784281168340617	0.00291436460096906	0.00587720816545509
325	temnothorax	M	1	17	H31T001R002	0.392851488180094	0.248817803131108	0.00215421911082855	0.00641228123058453	0.00292182678080728	0.00502030413082393
326	temnothorax	M	1	17	H31T001R003	0.424246366461387	0.295068199695891	0.00246790104124908	0.00783433289350983	0.00298596839286671	0.00568592369931083
327	temnothorax	M	1	17	H31T001R008	0.491590815013557	0.369587874292621	0.00913191183361998	0.0162657809190382	0.00413695436286992	0.012550536281697
328	temnothorax	M	1	17	H31T001R015	0.425521393277211	0.307881319896823	0.00338233671824839	0.00655905104055742	0.00261823836695733	0.00510177168179273
329	temnothorax	M	1	17	H31T001R017	0.420950322350301	0.284131249053059	0.00362287852083299	0.00679405439124844	0.00344288034976121	0.00591904111550848
330	temnothorax	M	1	17	H14T001R002	0.392933390598058	0.191499929284131	0.00170412485322236	0.00630112686842589	0.00268629352175366	0.00670560942742412
331	temnothorax	M	1	17	H14T001R005	0.393958121303017	0.252903430114443	0.0033135349886342	0.00867336070519439	0.00315221008830889	0.00772049280200177
332	temnothorax	M	1	17	H14T001R017	0.368679874402057	0.201377832440922	0.00157213378763306	0.00319802668347243	0.0021108566063269	0.00348791331892259
333	temnothorax	M	1	17	H14T001R024	0.494009625247436	0.320456210835794	0.00288838697927815	0.0109382172660128	0.00396867331269849	0.010688869411214
334	temnothorax	M	1	17	H1T001R005	0.367313149629912	0.232284377630367	0.00223022820472293	0.00508745379639614	0.00283047851034334	0.00487031277883325
335	temnothorax	M	1	17	H1T001R007	0.45109181732752	0.339953776876699	0.00478945040148949	0.00982742544324022	0.00281556561068496	0.0069353961261062
336	temnothorax	M	1	17	H1T001R010	0.378259849822656	0.277412679977703	0.00315890417462164	0.00777947529755182	0.00339705186088664	0.00699855984080715
337	temnothorax	M	1	17	H1T001R012	0.452741398803294	0.328358678592847	0.00447924823596594	0.00879328789170207	0.00351347189509289	0.00707874527517361
338	temnothorax	M	1	17	H36T001R005	0.385601036904819	0.27240293392495	0.00298767972249305	0.00927519518572211	0.00295350386276297	0.00674122421577385
339	temnothorax	M	1	17	H36T001R011	0.36632331787161	0.234548226113484	0.00211578042396891	0.00598313707482097	0.00235406750030491	0.00485511087795986
340	temnothorax	M	1	17	H36T001R013	0.469724520204433	0.372260323605629	0.00715916972709387	0.0151742449876393	0.00305946036051944	0.00932154753073667
341	temnothorax	M	1	18	H16T001R002	0.432988200160404	0.364522526440849	0.00597159169983249	0.00915758385522307	0.00276718026625189	0.00670420420479367
342	temnothorax	M	1	18	H16T001R003	0.403891248463127	0.34012998501335	0.00616326330200026	0.00967357280429048	0.0028813090450369	0.00548378180631845
343	temnothorax	M	1	18	H9T001R003	0.407357371505935	0.331506488178294	0.00775241072253842	0.011747841541301	0.00426702861380356	0.00941762340995633
344	temnothorax	M	1	18	H31T001R001	0.399207697954682	0.277461023900177	0.00393715090770329	0.00748996925316598	0.00332379350762774	0.00592698587352033
345	temnothorax	M	1	18	H31T001R002	0.381362910904822	0.247099915651772	0.00231590021658956	0.00591237232725638	0.00307386174128133	0.00480608155079622
346	temnothorax	M	1	18	H31T001R003	0.410375411881212	0.293322227597427	0.0028921523382074	0.00774841363859012	0.00331004337976934	0.00577550505794201
347	temnothorax	M	1	18	H31T001R008	0.456678627079402	0.362139345889175	0.00915491373583443	0.0161346472849118	0.00518628555584484	0.0123258747829552
348	temnothorax	M	1	18	H31T001R015	0.414758972509033	0.304422289847044	0.00384758473204599	0.00633658037521503	0.00290342422521298	0.00512658788254142
349	temnothorax	M	1	18	H31T001R017	0.407866535349053	0.282049443403803	0.00387712773101377	0.00672168945904766	0.00344714119711821	0.00538185464607505
350	temnothorax	M	1	18	H14T001R002	0.374766360054807	0.190105394181486	0.00152141851658535	0.0062776183321243	0.00271303631629272	0.00619609771412513
351	temnothorax	M	1	18	H14T001R005	0.371714711709275	0.249676162773299	0.00321780425175779	0.00770537999392629	0.00344188081179807	0.00697602104772677
352	temnothorax	M	1	18	H14T001R017	0.360763268931897	0.200411840950759	0.00160922474252348	0.00311177473584094	0.0024097855414713	0.00363182122543496
353	temnothorax	M	1	18	H14T001R024	0.465421754221562	0.318388743523055	0.00311997863913644	0.0103921147570711	0.00409852698910971	0.0101077671984013
354	temnothorax	M	1	18	H1T001R005	0.354614003997975	0.230970586617885	0.0023287693883941	0.00450083763592174	0.00285006043959004	0.00422651861474866
355	temnothorax	M	1	18	H1T001R007	0.434669913501715	0.336297580478212	0.00501813943597256	0.0093469291049983	0.00297450315660398	0.00694671573159507
356	temnothorax	M	1	18	H1T001R010	0.359550653404092	0.274911927663208	0.00328548612049207	0.00743043513965617	0.00353483876164617	0.00601529206421394
357	temnothorax	M	1	18	H1T001R012	0.436606525288097	0.323940794822999	0.00437996048158475	0.00817925197244774	0.00348610670362341	0.00658849125668195
358	temnothorax	M	1	18	H36T001R005	0.367427893182785	0.270489321044955	0.00373891209719837	0.00813285347246995	0.00314608029931726	0.0058258693351437
359	temnothorax	M	1	18	H36T001R011	0.354131808427701	0.232755032002175	0.00248867522602362	0.00517702455331598	0.00298678165202167	0.00492194844999568
360	temnothorax	M	1	18	H36T001R013	0.444745932764108	0.366200580438562	0.00815787755456405	0.0138607948150729	0.00286410700512305	0.00838729824070695
361	temnothorax	M	1	19	H16T001R002	0.416209626356195	0.356686767514169	0.0064866561464407	0.00886568676227493	0.00271040419682361	0.00664540254592739
362	temnothorax	M	1	19	H16T001R003	0.392398590137605	0.33326372051742	0.00671945273941761	0.00912814493624648	0.0027320036254575	0.00529895683444104
363	temnothorax	M	1	19	H9T001R003	0.382188610692921	0.326588183943339	0.00763186552287986	0.0104368047597052	0.00428225390823001	0.00794809898231759
364	temnothorax	M	1	19	H31T001R001	0.387124459058685	0.275071777118464	0.00409148900921966	0.00761813942930623	0.00362872388465867	0.00575327768853086
365	temnothorax	M	1	19	H31T001R002	0.372130099100659	0.245362375550236	0.0030819675466951	0.00579552860927353	0.00300958215946551	0.00437913557996742
366	temnothorax	M	1	19	H31T001R003	0.399074257173008	0.290922252545538	0.00289593429249597	0.00736232396477282	0.00320822323578372	0.00550492140647336
367	temnothorax	M	1	19	H31T001R008	0.424787168205145	0.356116154937873	0.00902622590106615	0.0142778594670866	0.0047961417239118	0.0104713286444264
368	temnothorax	M	1	19	H31T001R015	0.403670461875486	0.301469848453495	0.0041562893183678	0.00608125861864788	0.00276577843891594	0.00480005775938164
369	temnothorax	M	1	19	H31T001R017	0.395585678548936	0.279699733616855	0.00402186196868202	0.00599397827143964	0.00371701339510938	0.00527349095584636
370	temnothorax	M	1	19	H14T001R002	0.357376052768123	0.188891377116779	0.00161924761990502	0.00530959848134175	0.00326442203169774	0.0061523226510333
371	temnothorax	M	1	19	H14T001R005	0.353786838485181	0.245931709429315	0.00313103501312086	0.00678311244259035	0.00343505518748166	0.00608784821518782
372	temnothorax	M	1	19	H14T001R017	0.353745646008402	0.199648597840843	0.00140308467883107	0.00326422715687781	0.00284013669897253	0.00396322241788751
373	temnothorax	M	1	19	H14T001R024	0.441337901075874	0.315847348049481	0.00418331630652086	0.0102901157768127	0.0048320683527673	0.0101318349256043
374	temnothorax	M	1	19	H1T001R005	0.344830991725214	0.229335779467306	0.0026491486606795	0.00379753474294645	0.00328024407564222	0.00406105011325677
375	temnothorax	M	1	19	H1T001R007	0.419953980290673	0.331909878460481	0.00519993181128664	0.00910151373742471	0.00388285062864151	0.00732950223159386
376	temnothorax	M	1	19	H1T001R010	0.343665276468428	0.272094669179037	0.00349739620119744	0.00664087382903873	0.00401605268284291	0.0057990149921946
377	temnothorax	M	1	19	H1T001R012	0.422115219824713	0.320399156169372	0.00489915029227357	0.00752948813082448	0.00385073738987797	0.00651367444231739
378	temnothorax	M	1	19	H36T001R005	0.351968153722929	0.268030394707036	0.00397150438357804	0.00781081834983573	0.00348753567532685	0.00536879389786426
379	temnothorax	M	1	19	H36T001R011	0.343910747805359	0.231297203407876	0.00272558495090897	0.00506747864509434	0.00309277220825654	0.00491930956800063
380	temnothorax	M	1	19	H36T001R013	0.422558857005051	0.361167376247706	0.00921380865324568	0.0129194491974523	0.00354317851432461	0.00861629905193379
381	temnothorax	M	1	20	H16T001R002	0.402145612773541	0.350658759361996	0.00673083826358288	0.00869802216360253	0.00332913743784329	0.00644446561475841
382	temnothorax	M	1	20	H16T001R003	0.382639950470474	0.32727099392784	0.00713756529152511	0.00911220180673818	0.00311905577145958	0.00559881440465093
383	temnothorax	M	1	20	H9T001R003	0.363270924463035	0.321928835719995	0.00747038284887913	0.0097091931865371	0.00489215834522303	0.00731420842775403
384	temnothorax	M	1	20	H31T001R001	0.376154522758211	0.272415120700319	0.00415642815037043	0.00713149388120872	0.00306955617947999	0.00512946962475424
385	temnothorax	M	1	20	H31T001R002	0.364536281996416	0.243388495402342	0.00313297238024707	0.00546805908642143	0.00329507649863555	0.00433877133120901
386	temnothorax	M	1	20	H31T001R003	0.387645626830177	0.288453676693852	0.00311139729441192	0.00717537739081018	0.00362267358049079	0.00541504709097344
387	temnothorax	M	1	20	H31T001R008	0.399452581769858	0.350318495998917	0.00974154081919522	0.0125894172686005	0.00510997441431712	0.00975543321168344
388	temnothorax	M	1	20	H31T001R015	0.395404437141499	0.299243113909615	0.00398919343223927	0.00631285672032272	0.00383684920446187	0.00544713525252074
389	temnothorax	M	1	20	H31T001R017	0.386824253162846	0.277229243706986	0.00425746015391745	0.00569110999209951	0.00423312057408424	0.00534916072276051
390	temnothorax	M	1	20	H14T001R002	0.343642931455045	0.187123363598104	0.00183029703706667	0.00451588868220009	0.0035985285299733	0.00601519886495235
391	temnothorax	M	1	20	H14T001R005	0.339497126411012	0.242504633842827	0.00297019632899167	0.00637171436116491	0.00399980238712822	0.00567744557311575
392	temnothorax	M	1	20	H14T001R017	0.346563527436385	0.198310072729667	0.00143525171761108	0.00337829090733262	0.00324394954240712	0.00400460150002428
393	temnothorax	M	1	20	H14T001R024	0.41846715903464	0.31288648114991	0.00442700550273462	0.0105395643099653	0.00423966323332477	0.00905795044812897
394	temnothorax	M	1	20	H1T001R005	0.337247994387858	0.227930705564611	0.00245768878552813	0.00376053272831235	0.0038192436576836	0.00428460989710523
395	temnothorax	M	1	20	H1T001R007	0.407079092872365	0.327487418748049	0.0053091722059851	0.00891706074424379	0.00356246019576777	0.00672395132055519
396	temnothorax	M	1	20	H1T001R010	0.332871880547177	0.269684988167917	0.00367188097705702	0.00635571008901476	0.00398595452951713	0.00476613363120571
397	temnothorax	M	1	20	H1T001R012	0.410381421115494	0.316562038855184	0.00538486489729341	0.00722928672485582	0.00383756734927259	0.00590547701884019
398	temnothorax	M	1	20	H36T001R005	0.341040243429837	0.265660369779505	0.00395901509146512	0.00764565770095493	0.00349198826300035	0.00483618403261763
399	temnothorax	M	1	20	H36T001R011	0.333022674148258	0.229689450303305	0.00302136202595795	0.00467517276517528	0.00315788348321658	0.00453177559095599
400	temnothorax	M	1	20	H36T001R013	0.403662330578366	0.354186610028885	0.01011360876106	0.0112399822782174	0.0037012773509491	0.00786839683172121
401	temnothorax	R	1	1	H16T001R002	0.987955799425439	0.970847055223495	1.35159322047235e-05	1.1926216902483e-05	6.54079527085756e-07	7.48745894269075e-06
402	temnothorax	R	1	1	H16T001R003	0.987321490735053	0.964882742032947	3.50940750120912e-05	0.00011092890855774	3.19333117550035e-06	4.81340663191304e-06
403	temnothorax	R	1	1	H9T001R003	0.99712728682394	0.981749053378031	4.37114811338121e-05	1.90120566503749e-05	5.26503982782774e-06	7.45518406910083e-06
404	temnothorax	R	1	1	H31T001R001	0.995917875650184	0.983557828407671	1.64919501743995e-05	7.15459346141324e-05	2.72554995335974e-06	5.73040345945109e-07
405	temnothorax	R	1	1	H31T001R002	0.99232091672672	0.988063375370155	4.59246966444376e-05	3.90292373735628e-05	-1.07573965645719e-06	3.07692141513747e-06
406	temnothorax	R	1	1	H31T001R003	0.993984520067738	0.969574934172504	1.04213346300775e-07	-6.19262974893204e-05	5.17530218289722e-06	1.3916699034852e-06
407	temnothorax	R	1	1	H31T001R008	1.00711875068309	0.981302826429246	-5.9206782039016e-06	-2.37460981909074e-06	9.97144642011186e-07	1.87144469052903e-06
408	temnothorax	R	1	1	H31T001R015	0.992121734111614	0.971481951789999	4.88030260958819e-05	0.000257227875121232	6.00237611153605e-06	2.51667789820092e-06
409	temnothorax	R	1	1	H31T001R017	0.991392633666187	0.984921969181076	-3.53288519908332e-06	0.00018345528198658	3.92435345322791e-06	1.06253101348968e-07
410	temnothorax	R	1	1	H14T001R002	0.996366201500697	0.977533082476742	1.36090577402248e-06	0.000136152170012164	5.7994731124362e-06	-2.35179490556564e-06
411	temnothorax	R	1	1	H14T001R005	0.995680056864272	0.980550785348616	-4.50501343678005e-05	-1.68340347104558e-05	4.56005710874591e-06	2.42749414861204e-06
412	temnothorax	R	1	1	H14T001R017	0.98698263977355	0.969380883533954	-1.09005001840741e-06	-2.51497710881244e-05	-1.19326190022503e-06	-2.63502743508786e-08
413	temnothorax	R	1	1	H14T001R024	0.997908426786295	0.974194040173923	6.73370968141538e-06	3.08172950241669e-05	4.28718230695356e-06	-3.23020011167962e-07
414	temnothorax	R	1	1	H1T001R005	0.992132468467784	0.976231501915505	-2.63573276966756e-05	7.15762860554967e-05	2.65521273299374e-06	2.03707544226236e-06
415	temnothorax	R	1	1	H1T001R007	0.996388728045673	0.984146716316415	3.58077013611879e-05	4.13207387887052e-05	1.34688337393466e-06	4.1406703273847e-06
416	temnothorax	R	1	1	H1T001R010	0.997241019073553	0.981815555852315	-5.04426764092738e-05	1.21842449739497e-05	1.88883196700245e-06	2.08826997566267e-06
417	temnothorax	R	1	1	H1T001R012	0.998353822721833	0.974782158792335	8.34765578508826e-07	7.95291281577315e-05	-1.45549560406856e-06	-7.68395448959748e-07
418	temnothorax	R	1	1	H36T001R005	0.99817703781089	0.980275196808156	-1.8691186938513e-06	7.17776189871753e-05	4.02857404908692e-06	5.36192956779198e-06
419	temnothorax	R	1	1	H36T001R011	0.995003918961911	0.978946996980009	2.63268106014146e-05	-0.000107399054212135	3.09359210434159e-06	4.75382797060683e-06
420	temnothorax	R	1	1	H36T001R013	0.996857048979992	0.978002621031506	1.77361313297059e-05	-8.22010312880905e-05	6.0115386976239e-06	2.47324613684331e-06
421	temnothorax	R	1	2	H16T001R002	0.987162564319654	0.970744744505459	1.3421644705191e-05	2.7501713929924e-06	1.55003553171944e-06	1.32984849455322e-05
422	temnothorax	R	1	2	H16T001R003	0.986285073882926	0.964843653971705	4.39437550349507e-05	0.000119932489000819	8.17761372308947e-06	5.08676017685383e-06
423	temnothorax	R	1	2	H9T001R003	0.994851401256738	0.981608889809738	3.89673921668111e-05	9.55556129799867e-06	3.78254884479869e-06	7.08869656223941e-06
424	temnothorax	R	1	2	H31T001R001	0.994948737985498	0.983629338403124	-2.34224439062162e-06	8.1407523440149e-05	2.36648205091312e-06	5.17226983001471e-06
425	temnothorax	R	1	2	H31T001R002	0.992432568167801	0.988014309654319	6.2322977850638e-05	5.72922980313411e-05	3.57524699800138e-06	9.17563262723351e-06
426	temnothorax	R	1	2	H31T001R003	0.993344985329738	0.969648557067165	-3.16954922736544e-06	-6.07382432367412e-05	7.71671638961881e-06	9.00382063324894e-06
427	temnothorax	R	1	2	H31T001R008	1.0036622650235	0.98125005030255	-2.83617452374528e-06	-1.15799198893626e-05	1.08297301330501e-05	7.02363238868632e-06
428	temnothorax	R	1	2	H31T001R015	0.991996458556314	0.971553667433895	6.05319875075309e-05	0.000242127756969953	1.10174134157412e-05	5.61486393607134e-06
429	temnothorax	R	1	2	H31T001R017	0.991283721777832	0.984857559720654	-1.54089181933918e-05	0.000200847113445989	7.89816866754489e-06	7.19938454974505e-06
430	temnothorax	R	1	2	H14T001R002	0.996186656415896	0.977476745076025	4.45205756349646e-06	0.000120329372037594	-4.50860210108485e-06	3.84749712019929e-06
431	temnothorax	R	1	2	H14T001R005	0.995098239732921	0.980512427288488	-3.0211603945541e-05	-4.61918513353825e-06	1.18676453740855e-05	3.1952887659813e-06
432	temnothorax	R	1	2	H14T001R017	0.986680160671805	0.969481433536006	-1.80458129762796e-05	-3.22409816773649e-05	1.13819840958676e-05	9.00304709899836e-06
433	temnothorax	R	1	2	H14T001R024	0.996612030583496	0.974209058662602	-1.17511618923884e-05	2.06372644438109e-05	9.53180311446235e-06	5.75999949192977e-06
434	temnothorax	R	1	2	H1T001R005	0.991715021850738	0.976224172662864	-3.50365030725789e-05	6.31061152857773e-05	1.05659023453179e-05	2.23971358465507e-06
435	temnothorax	R	1	2	H1T001R007	0.995252955221062	0.98408871114395	5.18928145652399e-05	5.10669346914472e-05	8.58429070532323e-06	1.56677315420789e-06
436	temnothorax	R	1	2	H1T001R010	0.996219965155229	0.981718317949451	-6.22866576518975e-05	2.37037666359489e-05	5.06573345462349e-06	7.12186237180206e-06
437	temnothorax	R	1	2	H1T001R012	0.997386525183273	0.974880613017904	1.1334509009298e-05	9.51541290653739e-05	1.16047142702744e-05	-2.10692121082805e-06
438	temnothorax	R	1	2	H36T001R005	0.996829784152934	0.98024269418735	3.64809900927221e-05	8.83612450725064e-05	-1.55951963334457e-06	5.36965098164968e-06
439	temnothorax	R	1	2	H36T001R011	0.995041370476156	0.978969831718786	4.96940191940625e-05	-0.00013154686115633	4.85814112104709e-06	2.97422459888062e-06
440	temnothorax	R	1	2	H36T001R013	0.995889492439635	0.977931307603868	1.36362882895379e-05	-9.15156430487216e-05	4.6245501408954e-07	1.07420563729532e-05
441	temnothorax	R	1	3	H16T001R002	0.984606928167971	0.969677995860443	-1.54647693477183e-05	3.36272511359445e-06	1.15915189545279e-05	1.89808308851831e-05
442	temnothorax	R	1	3	H16T001R003	0.983427947186148	0.963974595235875	3.84422370729444e-05	0.000107296008343458	2.30555623688319e-05	1.30189232995899e-05
443	temnothorax	R	1	3	H9T001R003	0.992401848329549	0.981366759673671	4.56139214403969e-05	1.96520885572892e-06	4.62719679059944e-07	8.1747489699367e-06
444	temnothorax	R	1	3	H31T001R001	0.992628132047661	0.983393571285215	-2.47755206745747e-05	7.22086806977496e-05	1.40781076729462e-05	1.57500365928352e-05
445	temnothorax	R	1	3	H31T001R002	0.990382067424455	0.988035107697825	0.000130569752781002	6.51609278451362e-05	1.13051057029868e-05	1.05491584027289e-05
446	temnothorax	R	1	3	H31T001R003	0.991766695288464	0.969029942228194	-4.28999323379716e-06	-6.91763770207014e-05	1.3023521846932e-05	6.28243687525413e-06
447	temnothorax	R	1	3	H31T001R008	0.999035402657255	0.980930894816469	7.82517038171371e-06	-2.22135982694639e-05	1.51567479699995e-05	3.7753048079583e-07
448	temnothorax	R	1	3	H31T001R015	0.990961877522252	0.971012306755912	9.5071917817073e-05	0.000243195420947245	2.16294536837815e-06	8.84060165682473e-06
449	temnothorax	R	1	3	H31T001R017	0.989944375392527	0.984869106705891	2.30521400024603e-05	0.000227642909897931	1.27156633225961e-05	7.25893797998655e-06
450	temnothorax	R	1	3	H14T001R002	0.995745345978029	0.977489525666844	-1.09346375411658e-06	8.8359772039321e-05	6.57885175564159e-06	1.35926683344209e-05
451	temnothorax	R	1	3	H14T001R005	0.993994773876245	0.980405801801376	-3.21731584639846e-05	3.90171492954433e-06	8.17341600051635e-06	1.13100664084157e-05
452	temnothorax	R	1	3	H14T001R017	0.985911819482919	0.969349415724528	1.39009828781068e-05	-1.38297496160092e-05	6.77553043368261e-06	5.46250172307967e-06
453	temnothorax	R	1	3	H14T001R024	0.994828167261171	0.97366302338501	-3.74381705828394e-05	1.0378444469919e-05	4.16010546561914e-06	1.5320220294141e-05
454	temnothorax	R	1	3	H1T001R005	0.989986684942991	0.975903165124073	8.81014446060451e-07	9.86454919555347e-05	1.3648584117449e-05	1.44922690569895e-05
455	temnothorax	R	1	3	H1T001R007	0.993129174501152	0.983505281428649	0.000114730776031787	5.39828968490103e-05	9.87122997168222e-06	1.68043791622629e-05
456	temnothorax	R	1	3	H1T001R010	0.994409603958563	0.981635236531387	-7.57821369709615e-05	2.2092059767371e-05	4.97054881861596e-06	1.10208167074576e-05
457	temnothorax	R	1	3	H1T001R012	0.995954189961968	0.974448795574198	-9.88871637071385e-06	0.0001151540816979	1.02107688890569e-05	1.25351987056852e-05
458	temnothorax	R	1	3	H36T001R005	0.994076510270778	0.980018139388189	4.50039239552545e-05	8.61984632108944e-05	5.02334682886666e-06	1.74785180714117e-05
459	temnothorax	R	1	3	H36T001R011	0.993665226009868	0.978616597496159	-2.69269359523282e-06	-0.000142595108056372	8.42116814532452e-06	4.54465001737355e-06
460	temnothorax	R	1	3	H36T001R013	0.993302450073864	0.977592172194684	2.73927174671109e-05	-8.03513582906996e-05	1.80909889703946e-05	5.32791869330524e-06
461	temnothorax	R	1	4	H16T001R002	0.983766388094595	0.969370216323879	2.08381137192348e-05	8.60329410123673e-06	2.98182626009278e-05	1.57443769184667e-05
462	temnothorax	R	1	4	H16T001R003	0.982796821913947	0.963829291378429	5.40359666080594e-05	8.29518047698883e-05	1.73390911131456e-05	1.37094189491102e-05
463	temnothorax	R	1	4	H9T001R003	0.991406293254693	0.9813409957646	7.82833788642697e-05	-2.34581953617538e-05	2.83942658439588e-05	2.37611215386184e-05
464	temnothorax	R	1	4	H31T001R001	0.99151814912283	0.983465365043793	-3.68867898517333e-05	5.69942122702156e-05	1.91361915338683e-05	4.6889525316408e-06
465	temnothorax	R	1	4	H31T001R002	0.989918613452786	0.988254451134272	0.000145161850858158	8.54280586590631e-05	1.57422467279005e-05	2.2633779593983e-05
466	temnothorax	R	1	4	H31T001R003	0.991492299442375	0.96883440379603	2.63882880523703e-06	-7.88355195018828e-05	3.4172712884175e-05	2.57068552824874e-05
467	temnothorax	R	1	4	H31T001R008	0.996560734450502	0.980805943549113	4.05500735740312e-05	-2.99950911430411e-05	2.17505013380481e-05	2.15826226484261e-05
468	temnothorax	R	1	4	H31T001R015	0.99044978620088	0.970790342753568	8.44229223367614e-05	0.000287403390592196	1.92364187545671e-05	2.34591108726371e-05
469	temnothorax	R	1	4	H31T001R017	0.989341699357484	0.98505729552561	1.06323661892696e-05	0.000178925777984099	2.29393481270237e-05	1.83268167271156e-05
470	temnothorax	R	1	4	H14T001R002	0.99545720922335	0.977181750676037	5.81784371484886e-05	6.18755973331299e-05	1.6007294116552e-05	1.41119960730607e-05
471	temnothorax	R	1	4	H14T001R005	0.993079024481849	0.980056101716665	-4.46286710632804e-05	1.17550929326805e-05	1.8023466641198e-05	1.84561289292108e-05
472	temnothorax	R	1	4	H14T001R017	0.985653532689024	0.969296254012125	1.51743468084693e-05	1.78981204815316e-05	2.6452849884231e-05	1.37573193384413e-05
473	temnothorax	R	1	4	H14T001R024	0.994155748666035	0.973506470501269	-5.6387883038666e-05	3.47692579554473e-06	2.80410142858682e-05	1.74424140294507e-05
474	temnothorax	R	1	4	H1T001R005	0.989411372791755	0.975829424073962	5.84899906361733e-05	0.000165254536953833	1.92199159053717e-05	2.86638227650095e-05
475	temnothorax	R	1	4	H1T001R007	0.99249932622581	0.983199619525872	0.000174399207255538	7.64845216426579e-05	2.28067458383188e-05	2.88014795615126e-05
476	temnothorax	R	1	4	H1T001R010	0.993830169640375	0.981490613074598	-0.000111192463396863	1.16147911738056e-05	2.49377227518364e-05	1.80307345457117e-05
477	temnothorax	R	1	4	H1T001R012	0.995402154309493	0.974337055370953	-4.92878686442845e-05	0.00016607583693502	2.18211996609294e-05	2.33046385683993e-05
478	temnothorax	R	1	4	H36T001R005	0.991925421166942	0.979878655325772	4.46147346007192e-05	0.000147347271230867	9.84534145018032e-06	2.19447099369893e-05
479	temnothorax	R	1	4	H36T001R011	0.993066667647872	0.978546575650528	-1.60790549867219e-05	-0.000166615011908861	1.19524545430357e-05	2.67883142829254e-05
480	temnothorax	R	1	4	H36T001R013	0.992664710589859	0.977547222450302	7.32147158257583e-05	-7.74514747441592e-05	2.14649890834062e-05	1.24445889411792e-05
481	temnothorax	R	1	5	H16T001R002	0.982588957878728	0.969191340230143	7.79635767812934e-05	-9.04643735375282e-06	2.11388007411915e-05	5.7448838650196e-05
482	temnothorax	R	1	5	H16T001R003	0.98222379679028	0.963809944068739	4.10303735024031e-05	8.30895253219863e-05	5.63731917055012e-05	3.14055419378693e-05
483	temnothorax	R	1	5	H9T001R003	0.990948018489915	0.981328856074215	5.45740248650794e-05	-3.08661667955735e-05	3.23002003976638e-05	5.15460910149531e-05
484	temnothorax	R	1	5	H31T001R001	0.990419990963619	0.983228062795143	-4.23414801899458e-05	5.18082148076835e-05	6.10157224201751e-05	4.63690279385799e-05
485	temnothorax	R	1	5	H31T001R002	0.989880263970271	0.988118587269097	8.65631130273204e-05	9.11292431346916e-05	3.43710702389649e-05	4.22505671612363e-05
486	temnothorax	R	1	5	H31T001R003	0.991156823886747	0.968663245166802	8.99393234222459e-05	-3.8406510085166e-05	5.79519498533488e-05	4.4585200860671e-05
487	temnothorax	R	1	5	H31T001R008	0.994961843845328	0.980759669968044	3.34417335589288e-05	-1.65846804447645e-05	3.48773534657371e-05	5.76913892739992e-05
488	temnothorax	R	1	5	H31T001R015	0.990182371069598	0.970766683081619	0.000146282331504532	0.000317812430937792	2.84845248011014e-05	4.6393962933763e-05
489	temnothorax	R	1	5	H31T001R017	0.988695456472231	0.985007450159697	9.29992030105828e-05	0.000210562959817682	2.14926185721441e-05	4.25616670455351e-05
490	temnothorax	R	1	5	H14T001R002	0.995204882111333	0.97709410837109	0.000121199091165091	0.000145017655626681	5.70866847116337e-05	4.6575405164434e-05
491	temnothorax	R	1	5	H14T001R005	0.992653176620265	0.980094582952156	7.71293973171975e-05	-1.44832805797577e-05	4.12341136169414e-05	5.43576032856895e-05
492	temnothorax	R	1	5	H14T001R017	0.986074151953382	0.969431491229568	8.60728111958847e-05	4.8398274044281e-05	3.43768740979215e-05	2.82086913534601e-05
493	temnothorax	R	1	5	H14T001R024	0.993577979063542	0.973505312573619	-5.57595379590164e-05	-1.97149079872523e-05	4.48937498665182e-05	3.71921083479321e-05
494	temnothorax	R	1	5	H1T001R005	0.988898873872132	0.975709373678371	3.40007068790946e-05	0.000213967142771114	4.42472075138522e-05	2.04766819992277e-05
495	temnothorax	R	1	5	H1T001R007	0.991871344710418	0.983076927865803	0.000228401841650235	9.95007691386723e-05	3.66920428717745e-05	4.37866492139662e-05
496	temnothorax	R	1	5	H1T001R010	0.992694541985546	0.981582768882997	-0.000106452829881891	-2.27386032999038e-05	4.75021039190177e-05	2.66026449639942e-05
497	temnothorax	R	1	5	H1T001R012	0.99510253264157	0.974318365194463	-0.000120575515380307	0.000128577465676035	5.24828430269969e-05	4.81975759679906e-05
498	temnothorax	R	1	5	H36T001R005	0.9905205240259	0.979795872145118	5.07657537273072e-05	0.000138348552964049	3.79863433657619e-05	3.91728450897096e-05
499	temnothorax	R	1	5	H36T001R011	0.992658605845795	0.978304328616829	-3.10744079084823e-05	-0.000148541037837236	3.83711095383056e-05	3.06063831227581e-05
500	temnothorax	R	1	5	H36T001R013	0.992157123827468	0.977420078013521	4.92505388154616e-05	-5.44753750105544e-05	2.9648258850972e-05	3.82486233799974e-05
501	temnothorax	R	1	6	H16T001R002	0.982017084578802	0.968724643294337	0.000263619876510045	3.2393932357425e-05	8.92090362851097e-05	6.41880134632566e-05
502	temnothorax	R	1	6	H16T001R003	0.982355653502301	0.96361075540876	2.27581505777744e-05	0.000147331382046041	8.16951320558668e-05	8.47714276795965e-05
503	temnothorax	R	1	6	H9T001R003	0.990349251350564	0.981388303307553	-3.05440247870031e-05	-2.32135193896239e-05	7.31647080270485e-05	0.000111557499963917
504	temnothorax	R	1	6	H31T001R001	0.989913221060542	0.983085599612624	-3.46161475691391e-05	3.08964498864104e-05	9.61638218128951e-05	7.3666013193325e-05
505	temnothorax	R	1	6	H31T001R002	0.989375644814167	0.988017691501719	0.000239542416478046	9.97892912495804e-05	7.52598167632214e-05	8.1291711966835e-05
506	temnothorax	R	1	6	H31T001R003	0.990840065053753	0.968562072268781	0.000213306257513701	-3.33175615069067e-05	5.02335940311364e-05	7.01034925861552e-05
507	temnothorax	R	1	6	H31T001R008	0.993712779354385	0.980682537661146	0.00014954362770751	-1.57026586683138e-05	7.99885111840946e-05	8.5167991624514e-05
508	temnothorax	R	1	6	H31T001R015	0.990379707096367	0.970759373330964	0.000255288012334828	0.000389971865908329	6.18346070225611e-05	5.47197622025958e-05
509	temnothorax	R	1	6	H31T001R017	0.988082569828407	0.985017110567237	0.00026702885950966	7.36500588154612e-05	9.49306069552107e-05	7.68441353052598e-05
510	temnothorax	R	1	6	H14T001R002	0.994598480414316	0.977008848081929	0.00020920397544808	0.000167470380657068	0.000105318325313777	9.8329215891661e-05
511	temnothorax	R	1	6	H14T001R005	0.992298591821102	0.979959810208406	0.000106507966554313	-8.65609095894001e-05	7.58556961600401e-05	8.78471069375468e-05
512	temnothorax	R	1	6	H14T001R017	0.985938375714237	0.969335737399178	0.000140213476901417	0.000133391859930088	8.54462224468594e-05	6.55838715958135e-05
513	temnothorax	R	1	6	H14T001R024	0.993113756780935	0.973478142695803	-6.90177849710897e-05	8.52055175978782e-05	8.47705536465698e-05	8.78734154876154e-05
514	temnothorax	R	1	6	H1T001R005	0.988736167780908	0.975692067389864	6.96200002616549e-05	0.000298381734947178	6.09952766988491e-05	9.80487606237897e-05
515	temnothorax	R	1	6	H1T001R007	0.991584924648053	0.98286558249723	0.000341151602602563	2.19127033332977e-05	0.000105874532548471	0.000114897040153907
516	temnothorax	R	1	6	H1T001R010	0.99183782173795	0.981563434535916	-4.9772803011899e-05	9.24872483515787e-05	0.000108398939449058	7.30053180514325e-05
517	temnothorax	R	1	6	H1T001R012	0.994268926824284	0.974086029021045	-0.000110627085737053	0.000322780108416253	6.58800389341816e-05	9.30558850527208e-05
518	temnothorax	R	1	6	H36T001R005	0.989572104916752	0.979434398434095	-8.64336369961983e-05	0.000234974951818831	9.43658801608897e-05	6.47938160994468e-05
519	temnothorax	R	1	6	H36T001R011	0.992404090124254	0.97848655083203	-3.88969231894162e-05	-3.48868091455273e-05	6.52490902369178e-05	8.57706154688637e-05
520	temnothorax	R	1	6	H36T001R013	0.991888288695411	0.977315703851492	0.000115571369128326	5.95451716449603e-05	7.90612303041871e-05	8.25339495869066e-05
521	temnothorax	R	1	7	H16T001R002	0.98187196029021	0.968012237791505	0.000340583696892108	0.00011643102472581	0.000132655480886795	0.000180910404225868
522	temnothorax	R	1	7	H16T001R003	0.981473950611926	0.963636148510513	0.000126615573718383	0.000226794702845722	0.000182723385019694	0.000161114444944215
523	temnothorax	R	1	7	H9T001R003	0.990071383099085	0.981323191186642	4.17416470125367e-05	-1.91578036758205e-05	0.000162419246266835	0.000190086710899208
524	temnothorax	R	1	7	H31T001R001	0.989483214463348	0.98312867445795	-0.000102311760369753	0.000122719690701908	0.000183530495769574	0.000188385789852324
525	temnothorax	R	1	7	H31T001R002	0.98871144167204	0.987420115279571	0.000353820329752665	0.000115384497844831	0.000168026681372988	0.000164724629044089
526	temnothorax	R	1	7	H31T001R003	0.990462831287749	0.968577950141827	0.000410327587742343	0.000145765175090699	0.000175646026209183	0.000156114519983351
527	temnothorax	R	1	7	H31T001R008	0.992300100180842	0.980422679021196	0.000184019689265041	-1.64838755915303e-05	0.000156663821239115	0.000151152368780422
528	temnothorax	R	1	7	H31T001R015	0.990609933540718	0.970582050582293	0.000433538530344252	0.000433939819024862	0.00015720280210109	0.000158612844408252
529	temnothorax	R	1	7	H31T001R017	0.987758099541095	0.985094557168647	0.000249132503004469	0.000124057154471344	0.000162690514222282	0.000141332439670336
530	temnothorax	R	1	7	H14T001R002	0.99442792975001	0.976626194988184	0.000182073497050213	0.000341505096296063	0.000189415433964095	0.000155904140462044
531	temnothorax	R	1	7	H14T001R005	0.991905011674079	0.979738860917104	0.000159674412316974	1.00116750021623e-05	0.000168712829254515	0.000169598813235875
532	temnothorax	R	1	7	H14T001R017	0.985961626231857	0.96926788749648	0.000175155584825028	0.000205617179176359	0.00019955670470048	0.000181253263218895
533	temnothorax	R	1	7	H14T001R024	0.992268874963319	0.973411843434366	5.94585467780374e-05	7.17485152675493e-05	0.00014506089874652	0.000198558703942671
534	temnothorax	R	1	7	H1T001R005	0.988166310222041	0.975535084015832	0.00015773728384261	0.000428934417901868	0.000200690910065316	0.000148675495580381
535	temnothorax	R	1	7	H1T001R007	0.991766427645478	0.982676004714139	0.000471127687029631	1.18728017196225e-05	0.000191020747628429	0.000212945654760708
536	temnothorax	R	1	7	H1T001R010	0.991131612192099	0.981491438581949	2.68386750212746e-06	0.000300404894122832	0.000161168971909817	0.000196575971768936
537	temnothorax	R	1	7	H1T001R012	0.993900223252865	0.973587943713535	0.000123252124959237	0.000314349867897352	0.000166330240286655	0.000196541744793948
538	temnothorax	R	1	7	H36T001R005	0.988883397418443	0.979021034162244	0.000103618982922046	0.000234620088099739	0.00016949763598527	0.000197549603829351
539	temnothorax	R	1	7	H36T001R011	0.992153661689809	0.97816610901749	0.000114679500327105	0.000230271342933074	0.000169291109950146	0.000148729554582104
540	temnothorax	R	1	7	H36T001R013	0.991142280604791	0.977092706186045	0.000319312213216598	8.96896898316602e-05	0.000214992937524415	0.000156687814574055
541	temnothorax	R	1	8	H16T001R002	0.981307182857414	0.967384934590486	0.000450024484315241	0.000427775134578025	0.000374207648429728	0.000343365696666469
542	temnothorax	R	1	8	H16T001R003	0.981234513249794	0.963412039373978	0.000353695474546777	0.000317677655013781	0.00037014731226412	0.000300514736500155
543	temnothorax	R	1	8	H9T001R003	0.989644029111146	0.981326016416461	0.000242923430319037	0.00010991148051589	0.000328688056562051	0.000340226961646151
544	temnothorax	R	1	8	H31T001R001	0.989058821679238	0.983026915653455	-7.87632624852524e-05	0.00013676970736174	0.000347099450606973	0.000300756893682362
545	temnothorax	R	1	8	H31T001R002	0.988207174355675	0.986929161106822	0.000485032628904105	0.000411647886723438	0.000380130309279304	0.000333207479960034
546	temnothorax	R	1	8	H31T001R003	0.990259255314824	0.96835718418938	0.000462425234914487	0.000374161030788067	0.000357852370768508	0.000317232849929615
547	temnothorax	R	1	8	H31T001R008	0.991632919688173	0.980054916095192	0.000424570490890806	8.3482716469558e-05	0.000291411143268602	0.000387623470349304
548	temnothorax	R	1	8	H31T001R015	0.990294968679361	0.970506189092905	0.000769159321241011	0.00046002358336488	0.000366668136344355	0.00035345920173536
549	temnothorax	R	1	8	H31T001R017	0.987391636560124	0.984884775166211	0.000158437496038204	0.000392980303034967	0.000336264209255397	0.000334664433190596
550	temnothorax	R	1	8	H14T001R002	0.994098482169893	0.976525371741998	0.000424247941863968	0.000610044168991359	0.000352494791436807	0.000332057555734137
551	temnothorax	R	1	8	H14T001R005	0.991505369369153	0.979500533458563	0.000298653445212781	0.00029478493034051	0.000383112686770339	0.000338068614884975
552	temnothorax	R	1	8	H14T001R017	0.985774995073667	0.969177012461273	0.000281755852641232	0.000356380381420869	0.000367516119519639	0.000303603824916305
553	temnothorax	R	1	8	H14T001R024	0.991507456598867	0.973252026658729	0.000254417338827252	0.000117894922418371	0.000317580480616396	0.000395003050041875
554	temnothorax	R	1	8	H1T001R005	0.987695504908221	0.975468638121315	0.000272211737283882	0.000814607969054027	0.000360201387722845	0.000324667034392934
555	temnothorax	R	1	8	H1T001R007	0.991552365482108	0.982278449824414	0.000733076560898545	0.000308062334789631	0.000341172991171089	0.000386130069616066
556	temnothorax	R	1	8	H1T001R010	0.990810770806424	0.981440581553342	0.00022034346720915	0.000113396174299222	0.000280495259785113	0.00035239659729414
557	temnothorax	R	1	8	H1T001R012	0.993366878991371	0.973254608492465	0.000199840046451838	0.000308273580802761	0.000327021293571699	0.000351687773197179
558	temnothorax	R	1	8	H36T001R005	0.987667432263788	0.978602135513788	0.00010392472962165	0.000684430815792228	0.000372199544133643	0.000366628125944334
559	temnothorax	R	1	8	H36T001R011	0.991343729543419	0.977993541029105	0.000207538321435255	0.000403680550304194	0.000346206619094209	0.000358903847626755
560	temnothorax	R	1	8	H36T001R013	0.990562384955134	0.977157028308754	0.000710362096051749	0.000233345513964833	0.000321074274902917	0.000291433347871808
561	temnothorax	R	1	9	H16T001R002	0.980914392873394	0.967185881299594	0.000565642941752158	0.000884397717428948	0.000699650584297954	0.000678859172337851
562	temnothorax	R	1	9	H16T001R003	0.980523350307688	0.963390071295801	0.00076432986147997	0.000795599263868781	0.000705774577612496	0.00065442948443584
563	temnothorax	R	1	9	H9T001R003	0.989101919266033	0.980668580499454	0.000882542025364062	0.000362909825350131	0.000644396862288668	0.000672009354921099
564	temnothorax	R	1	9	H31T001R001	0.98844009181641	0.982460356734564	0.000533857275015654	0.000329954454296027	0.000684555176145788	0.000630251936283532
565	temnothorax	R	1	9	H31T001R002	0.987931806181192	0.986325711970225	0.000914874874694634	0.000798595019259681	0.000665472878097544	0.000655093761062988
566	temnothorax	R	1	9	H31T001R003	0.989884312685869	0.968027358001743	0.000915606284862763	0.000643587989328861	0.000623706368249559	0.000629825589351301
567	temnothorax	R	1	9	H31T001R008	0.990687616713098	0.979848066057246	0.000639445498691772	0.00011564323404038	0.000635840854880469	0.000717476906660443
568	temnothorax	R	1	9	H31T001R015	0.990030330179744	0.97008356621427	0.000970151853136564	0.000965736666751266	0.000763050940865814	0.00075426535590119
569	temnothorax	R	1	9	H31T001R017	0.986888894444774	0.984621059374037	0.00048048987199581	0.000862791507945328	0.000651859295743337	0.000638270111290425
570	temnothorax	R	1	9	H14T001R002	0.993604590084091	0.976053024791634	0.000840506367151835	0.000947415196186733	0.000763244607926894	0.000637244556095578
571	temnothorax	R	1	9	H14T001R005	0.990816782566137	0.978881784777975	0.00087073295424853	0.000439434325068186	0.000671049238672349	0.00063169104019499
572	temnothorax	R	1	9	H14T001R017	0.985205318052612	0.969168233733642	0.000788944805969686	0.000479320995401104	0.000739170942199641	0.000708009586415765
573	temnothorax	R	1	9	H14T001R024	0.991196410317869	0.973199698952757	0.00056415212417884	0.000356805171404421	0.00065190880774116	0.000749547909155415
574	temnothorax	R	1	9	H1T001R005	0.986995192790863	0.975296065176413	0.000546164408815884	0.00122368883530022	0.000735218702791005	0.000659277754782878
575	temnothorax	R	1	9	H1T001R007	0.991119817965086	0.981724630143955	0.00115873582084366	0.000515528050883339	0.000663987640433507	0.000759505116794643
576	temnothorax	R	1	9	H1T001R010	0.989790479024192	0.980931080421495	0.00038714210926622	0.000154982951036627	0.000694708382473792	0.000607982191003478
577	temnothorax	R	1	9	H1T001R012	0.992868166233954	0.97288522586036	0.000496956851106696	0.00100957531211856	0.000672507772229502	0.000726900526090354
578	temnothorax	R	1	9	H36T001R005	0.986738441395458	0.978143682605823	0.000382305949225588	0.00149599206831672	0.000677436679192641	0.00070556838178652
579	temnothorax	R	1	9	H36T001R011	0.990839009264626	0.977399888891672	0.000729036063169332	0.000696502641638387	0.000719839581914062	0.000664013890646225
580	temnothorax	R	1	9	H36T001R013	0.989982495418023	0.977036755609983	0.00098447993512667	0.000560438288217924	0.000603641496402013	0.000778794838713506
581	temnothorax	R	1	10	H16T001R002	0.980428062966003	0.966155924655733	0.0011912063196305	0.00177564697764029	0.00132559791971968	0.00116829737947415
582	temnothorax	R	1	10	H16T001R003	0.979655604911446	0.962619849992131	0.000833740163205682	0.00151332933325519	0.00147374144518686	0.00123917719024252
583	temnothorax	R	1	10	H9T001R003	0.988086988177912	0.980177104432068	0.00136631665557954	0.00165681895374043	0.00137952214900106	0.00146271358914478
584	temnothorax	R	1	10	H31T001R001	0.988445665257945	0.981562360597976	0.00151844472225996	0.000787545839887101	0.00142078060726791	0.00130751557788533
585	temnothorax	R	1	10	H31T001R002	0.98668243555276	0.985181633186137	0.00147975013564716	0.00147175463064188	0.00130599081629069	0.00139826912772643
586	temnothorax	R	1	10	H31T001R003	0.989119532100334	0.96702285241632	0.00148026636910741	0.00174589569525983	0.00135360203472664	0.00133577778981925
587	temnothorax	R	1	10	H31T001R008	0.988949292522306	0.978969736092014	0.00111875348934816	0.000879205783241742	0.00129896059094879	0.00150268225275323
588	temnothorax	R	1	10	H31T001R015	0.989580427210317	0.969756847916334	0.00150190105054598	0.00136672778242176	0.00144851500425925	0.00138620145904581
589	temnothorax	R	1	10	H31T001R017	0.98616148269872	0.983596020586182	0.00148937787838628	0.0014982115289069	0.00148512323396775	0.00143144971076419
590	temnothorax	R	1	10	H14T001R002	0.992690905128986	0.975390283486105	0.00105401290900208	0.0017320710132068	0.00133982212559584	0.00137725772283397
591	temnothorax	R	1	10	H14T001R005	0.989527797662647	0.978883207931541	0.00177538053171403	0.000583191472652257	0.00145029284349227	0.00143234353686915
592	temnothorax	R	1	10	H14T001R017	0.984366118172715	0.968705359024309	0.00137054149999215	0.00147563962057923	0.00137325234396855	0.00123933186162217
593	temnothorax	R	1	10	H14T001R024	0.989854848762905	0.972912503207109	0.00131571643947653	0.000975856026648105	0.00130683957853455	0.00146914680539649
594	temnothorax	R	1	10	H1T001R005	0.985993890809636	0.974618715778938	0.00123724890648578	0.00165081152283681	0.00147760193432873	0.00144600380459014
595	temnothorax	R	1	10	H1T001R007	0.990401742219738	0.980115994719947	0.0018926198277608	0.0015915879084066	0.00140058972855884	0.00140696836996631
596	temnothorax	R	1	10	H1T001R010	0.988207804861743	0.980151326789885	0.000948819952112688	0.00145355161530336	0.00145097360712945	0.00128298335462334
597	temnothorax	R	1	10	H1T001R012	0.99199743100663	0.972494802954611	0.00100273066837095	0.00189089543964379	0.00138555593654409	0.00126025007283547
598	temnothorax	R	1	10	H36T001R005	0.985066518962129	0.977004026340043	0.000755167341633744	0.00229886290247464	0.00125467783008225	0.00143732223765546
599	temnothorax	R	1	10	H36T001R011	0.990186606306296	0.97598033779122	0.00135127535476576	0.00126396198690095	0.00140765728479579	0.00136620389897111
600	temnothorax	R	1	10	H36T001R013	0.98844953267389	0.976433526787126	0.0017894107979476	0.00101030274272258	0.00131040310531057	0.00134778845767169
601	temnothorax	R	1	11	H16T001R002	0.978843899966331	0.964388074585229	0.00308367992915571	0.00380472521066936	0.00273715288292639	0.00259123691239598
602	temnothorax	R	1	11	H16T001R003	0.977528198114026	0.961427172445286	0.0026408008498723	0.00249403310392331	0.00294347299790279	0.00261714237697442
603	temnothorax	R	1	11	H9T001R003	0.98710687836881	0.97821041894835	0.00247434287370393	0.00297429785746194	0.00282464322513128	0.00260392820922054
604	temnothorax	R	1	11	H31T001R001	0.987279436025103	0.980634897107964	0.00365172396801256	0.00170423926855669	0.00274038913023713	0.00262619007629854
605	temnothorax	R	1	11	H31T001R002	0.984436752246621	0.982924257659008	0.00304118867237217	0.00305405385917573	0.00299093655847346	0.00270448377105122
606	temnothorax	R	1	11	H31T001R003	0.987235957216554	0.966113501814555	0.00278758165666523	0.00347802710868655	0.00274785759575239	0.00278591888311226
607	temnothorax	R	1	11	H31T001R008	0.98643892318396	0.977895548044993	0.00252330268563398	0.00227570278609657	0.00260819400759527	0.0029529222750669
608	temnothorax	R	1	11	H31T001R015	0.987957639577229	0.968344283857711	0.00271878589957638	0.00287369702631985	0.00277028706086277	0.00286802444912114
609	temnothorax	R	1	11	H31T001R017	0.984766162202282	0.982213570313123	0.0030122427435123	0.00273907765329147	0.00285378678303891	0.00269273408076329
610	temnothorax	R	1	11	H14T001R002	0.991064853534758	0.973609258118062	0.00248089459980909	0.00224059524596973	0.00284975827475636	0.00290772982029697
611	temnothorax	R	1	11	H14T001R005	0.988184956053394	0.977060537487703	0.00301765654734889	0.0022618547483257	0.00264714582981741	0.00288712388318687
612	temnothorax	R	1	11	H14T001R017	0.98310601343461	0.967358920190516	0.00262000303538942	0.00265694815764557	0.00261919902195177	0.00280484860428331
613	temnothorax	R	1	11	H14T001R024	0.988294650997629	0.971029148289941	0.00269817030763251	0.00201854215861205	0.00281369714680526	0.00284748734602291
614	temnothorax	R	1	11	H1T001R005	0.984945449070101	0.972720673915504	0.00257430008942179	0.00317262247468163	0.00296664211004549	0.00274609617098493
615	temnothorax	R	1	11	H1T001R007	0.988900956569819	0.978697086015591	0.00410493002644705	0.00316872455582538	0.00279484607881871	0.00265743316142997
616	temnothorax	R	1	11	H1T001R010	0.986242602531255	0.978426414921756	0.00207534104162421	0.00292055541005644	0.0027181230916986	0.00268441041697237
617	temnothorax	R	1	11	H1T001R012	0.990444862425291	0.970943526399467	0.00235127483144442	0.00334257957854722	0.00287412705513413	0.00286456245024482
618	temnothorax	R	1	11	H36T001R005	0.984056130188457	0.97565767071723	0.00189733157483117	0.00411347389573277	0.00275111232806592	0.00265177248433173
619	temnothorax	R	1	11	H36T001R011	0.989285721601195	0.974720080200119	0.00266992270542361	0.00259480561890642	0.00278805249434618	0.00277919507276919
620	temnothorax	R	1	11	H36T001R013	0.98701849584806	0.975387018346673	0.0031758114132904	0.00226457360078017	0.00273980853849036	0.00275096053433008
621	temnothorax	R	1	12	H16T001R002	0.975482877833881	0.962490253403095	0.00681768169858854	0.00677933237154853	0.00540785484009929	0.00535758012907337
622	temnothorax	R	1	12	H16T001R003	0.97597791781697	0.958967489772922	0.0059846278526653	0.00530214520549467	0.00565654248698335	0.00524438401571876
623	temnothorax	R	1	12	H9T001R003	0.984642771573743	0.975207230917351	0.00493964166716824	0.00587179588118399	0.00553192601462652	0.00547819886396673
624	temnothorax	R	1	12	H31T001R001	0.984607949157283	0.978188847105318	0.00585567203726091	0.00460152663072031	0.00548659116206713	0.00537316245916813
625	temnothorax	R	1	12	H31T001R002	0.981656636195028	0.979354223182138	0.00627937725438565	0.00570526081355791	0.00558088603974684	0.0056949247020538
626	temnothorax	R	1	12	H31T001R003	0.983987978609233	0.962005019733096	0.00536509110118492	0.00570513627288813	0.00541509517970596	0.00545758769055002
627	temnothorax	R	1	12	H31T001R008	0.983608809524529	0.974061581205394	0.00626028459959027	0.00481941180733771	0.00544862900037839	0.00617788088451025
628	temnothorax	R	1	12	H31T001R015	0.985336141808302	0.966482960679308	0.00586006144337587	0.00556672501855257	0.00561991026808278	0.00561583425522336
629	temnothorax	R	1	12	H31T001R017	0.981890507746747	0.980174062967743	0.00613214721114567	0.00511515840456916	0.00549963890139123	0.00531292889873867
630	temnothorax	R	1	12	H14T001R002	0.988877075559254	0.970336698320716	0.00389654671321577	0.00542482222104518	0.00565752487992699	0.00593074908983928
631	temnothorax	R	1	12	H14T001R005	0.985083753621652	0.974075883833539	0.00593926531078116	0.00526805163867071	0.00550239036064344	0.00558751204913062
632	temnothorax	R	1	12	H14T001R017	0.97983430146128	0.965417927214362	0.00523649913454829	0.00551067150323779	0.00541238297516047	0.00567972200830606
633	temnothorax	R	1	12	H14T001R024	0.985732329314968	0.968586906124519	0.00472881388744761	0.00468666331385847	0.0055184173324293	0.00588589495919002
634	temnothorax	R	1	12	H1T001R005	0.981711835249062	0.969906416180379	0.0052795202076415	0.00555214596157865	0.00550599949878853	0.00534309030218592
635	temnothorax	R	1	12	H1T001R007	0.985633932560472	0.976656784835095	0.00651574318553355	0.00603625255311121	0.00548246955916965	0.00555958170750141
636	temnothorax	R	1	12	H1T001R010	0.983727582956228	0.975645289774572	0.00508581641699781	0.00513352313117448	0.00551522137281267	0.0053985163121163
637	temnothorax	R	1	12	H1T001R012	0.987060697292261	0.969024117467867	0.00426648223072782	0.00649677162093394	0.00564653077582154	0.00550004572917821
638	temnothorax	R	1	12	H36T001R005	0.980552764380309	0.972132755790592	0.00494328181673725	0.00713255295660571	0.00554136824599441	0.00558713397565361
639	temnothorax	R	1	12	H36T001R011	0.987264208282694	0.97142383783201	0.00537215400008647	0.00577068461601365	0.00582320995723019	0.00564549891260798
640	temnothorax	R	1	12	H36T001R013	0.983963247304111	0.971301444483279	0.00512491541982601	0.00483140602001134	0.00548053408186894	0.00575647078259391
641	temnothorax	R	1	13	H16T001R002	0.968863436439025	0.957234435919226	0.0127101726700887	0.012664285893002	0.0112711469968642	0.0105812144265878
642	temnothorax	R	1	13	H16T001R003	0.969748489966196	0.953029897211016	0.01197926736255	0.0108576163614845	0.0113756857159685	0.0100661039361043
643	temnothorax	R	1	13	H9T001R003	0.97907489474771	0.969556323328731	0.0116971071951782	0.0111815886735194	0.0115010663395091	0.0113809706956751
644	temnothorax	R	1	13	H31T001R001	0.97724835730379	0.972835916021662	0.0125505790676863	0.0101455555743362	0.0115724125622059	0.0112061449295529
645	temnothorax	R	1	13	H31T001R002	0.976498888873645	0.974191531568341	0.0111880330723434	0.0125271893072708	0.0114478863521403	0.0110840667766798
646	temnothorax	R	1	13	H31T001R003	0.978817333343097	0.955884505556936	0.0106196099629154	0.0113040452359313	0.0112639456517588	0.011198331210154
647	temnothorax	R	1	13	H31T001R008	0.976821128784056	0.967987186008923	0.0121353591389971	0.0114225670868015	0.0112620450389973	0.0117856664681768
648	temnothorax	R	1	13	H31T001R015	0.979083269890703	0.961113208880313	0.0109612285977412	0.010074145482569	0.0114424801247918	0.0116703538649132
649	temnothorax	R	1	13	H31T001R017	0.976323804795976	0.974009242236043	0.0138573926606906	0.0102821765871145	0.011406640841636	0.0108239087057845
650	temnothorax	R	1	13	H14T001R002	0.983215573917692	0.9650108768146	0.00874483275499925	0.0107785637062888	0.0115749366401551	0.0115132171863429
651	temnothorax	R	1	13	H14T001R005	0.979659364588031	0.968274599399731	0.0128456848790016	0.0109372770526614	0.0111523198415027	0.0113468532712631
652	temnothorax	R	1	13	H14T001R017	0.97522243565001	0.960756774691556	0.0105893850226279	0.0103400293902604	0.0114225660028532	0.0105626907179745
653	temnothorax	R	1	13	H14T001R024	0.980703104589756	0.963959081414494	0.00980479167138259	0.0101941641087653	0.0114565244761447	0.0118893295538581
654	temnothorax	R	1	13	H1T001R005	0.977370641501123	0.964089147269532	0.0107750955600821	0.0116664835244837	0.0116113357340678	0.0112046073224288
655	temnothorax	R	1	13	H1T001R007	0.979997003084626	0.971084604972423	0.0126921139757982	0.0133126145077324	0.0114157884525376	0.0114100324444891
656	temnothorax	R	1	13	H1T001R010	0.978386280434891	0.968829043239025	0.0103590966562641	0.00998590449302032	0.0118482155191212	0.0113430077177907
657	temnothorax	R	1	13	H1T001R012	0.981336972290493	0.963992143843545	0.0105646226782745	0.0127072503444541	0.0115257464657494	0.011506901559773
658	temnothorax	R	1	13	H36T001R005	0.973703469437806	0.966147388703615	0.0117263637309565	0.0126436017413412	0.0115212638708679	0.0115217618055156
659	temnothorax	R	1	13	H36T001R011	0.980644102465618	0.965782125734802	0.0114339905399093	0.0111283349680203	0.0111715964220528	0.0114833930988646
660	temnothorax	R	1	13	H36T001R013	0.978849403071435	0.966549251499549	0.00979454293518294	0.0118092038945226	0.0113910925475326	0.0115389155866613
661	temnothorax	R	1	14	H16T001R002	0.957231597851044	0.945678638544986	0.0247063523412258	0.0236807442642628	0.0247219473932086	0.0220923351039744
662	temnothorax	R	1	14	H16T001R003	0.960833338633733	0.941922466712094	0.0242749978918081	0.0221322285724375	0.0241482294070357	0.0218606449525406
663	temnothorax	R	1	14	H9T001R003	0.969576916577351	0.957680166923897	0.0267163650353924	0.0238442512988049	0.0243146795513817	0.0235945326626228
664	temnothorax	R	1	14	H31T001R001	0.964866805065764	0.961004317736895	0.0268861337442143	0.0234232052008105	0.024547277151727	0.0235793483731828
665	temnothorax	R	1	14	H31T001R002	0.965521163135998	0.963309638128028	0.0274224417234701	0.0229304708769041	0.0244685407431688	0.0233756443601591
666	temnothorax	R	1	14	H31T001R003	0.967501344732016	0.946186001296042	0.0252114763644879	0.0236885480195743	0.0246732019645803	0.0238566399054408
667	temnothorax	R	1	14	H31T001R008	0.96340381490648	0.956555442727893	0.0273783420368657	0.0241356855922087	0.0241948982611579	0.0246206746506054
668	temnothorax	R	1	14	H31T001R015	0.968774868590085	0.950512024843745	0.0209415120201799	0.0222078766436145	0.0241605887566394	0.0240867396957349
669	temnothorax	R	1	14	H31T001R017	0.965120217742557	0.961256615175419	0.028237238358669	0.0237314766784641	0.0243307920327413	0.0229102860934978
670	temnothorax	R	1	14	H14T001R002	0.97201973488576	0.954026857718287	0.0198581898109157	0.0238767761588936	0.0244520718025239	0.0245360535892982
671	temnothorax	R	1	14	H14T001R005	0.969311141346429	0.956815177756652	0.0247807686522808	0.0252063935862646	0.0244370707971305	0.0241960264389663
672	temnothorax	R	1	14	H14T001R017	0.963723224638393	0.949712988968358	0.0198641888869297	0.0221246491026157	0.024322222247689	0.0225032409529034
673	temnothorax	R	1	14	H14T001R024	0.966840975785684	0.95273320646469	0.0218307982315923	0.0234350024829848	0.0251120636620116	0.0244249780586707
674	temnothorax	R	1	14	H1T001R005	0.966862974737245	0.952272195075577	0.0231148589073339	0.0245917245547273	0.0243665344243807	0.0233426294524836
675	temnothorax	R	1	14	H1T001R007	0.968092844168904	0.958028960067785	0.027003348697633	0.0241874228858899	0.0244611578851941	0.0234507204900535
676	temnothorax	R	1	14	H1T001R010	0.966736023459832	0.957565447382571	0.0224067806671766	0.0236574519649053	0.0241170857012933	0.0239445223393221
677	temnothorax	R	1	14	H1T001R012	0.96906878720806	0.953389260212719	0.0230945907611908	0.0252547427443594	0.0238007189011771	0.0242145324236575
678	temnothorax	R	1	14	H36T001R005	0.961952434457826	0.954713960573934	0.0255813427370131	0.0246849406113203	0.0243885459673616	0.0236459439613926
679	temnothorax	R	1	14	H36T001R011	0.97044391242388	0.953089571032991	0.0260144856713897	0.0241269642009931	0.0245301750391026	0.0239206266100468
680	temnothorax	R	1	14	H36T001R013	0.967041800969497	0.956483385111489	0.0240901948437385	0.0223637841443083	0.0240902828047467	0.023587445672445
681	temnothorax	R	1	15	H16T001R002	0.934159508705733	0.92469098614323	0.0540884878875579	0.0494952972112398	0.054020647396939	0.0479626222308307
682	temnothorax	R	1	15	H16T001R003	0.937346027616239	0.92161758865033	0.0511456917495779	0.0491721277149592	0.0537250937031823	0.0489503710393546
683	temnothorax	R	1	15	H9T001R003	0.943739382189169	0.930226016852413	0.0559356672924659	0.0510314054624662	0.0522760545555849	0.053442896238638
684	temnothorax	R	1	15	H31T001R001	0.94132176679215	0.933324499415192	0.0587081448540883	0.0513105061718547	0.052925621408337	0.0522196446559957
685	temnothorax	R	1	15	H31T001R002	0.93867334282553	0.933717560749998	0.0602893927614139	0.0496947743584062	0.0537636697639361	0.0520316053159711
686	temnothorax	R	1	15	H31T001R003	0.942413674701392	0.924009188564634	0.0511069255211083	0.0529831090588935	0.0531011020881318	0.052840780611595
687	temnothorax	R	1	15	H31T001R008	0.93947387446171	0.929101565190564	0.0536520892432519	0.0548445492958576	0.0542124198541685	0.0549418096081354
688	temnothorax	R	1	15	H31T001R015	0.947015360462917	0.926799564284363	0.0454327237531686	0.0537722379209227	0.0527129875878217	0.0532956883355685
689	temnothorax	R	1	15	H31T001R017	0.941394423756748	0.938990219621982	0.0596827813879198	0.0517802646081204	0.0517783897043284	0.050666118757737
690	temnothorax	R	1	15	H14T001R002	0.948894676860499	0.930770270026396	0.0471944339915321	0.0575371288898288	0.053259065121763	0.0556738568820636
691	temnothorax	R	1	15	H14T001R005	0.945929444890313	0.93262175623611	0.0528231891630127	0.0568557953498438	0.0522928204679168	0.053299504323511
692	temnothorax	R	1	15	H14T001R017	0.940343009250399	0.92879628547031	0.0471980564032814	0.0490218627716709	0.0528436941883654	0.0500711304744613
693	temnothorax	R	1	15	H14T001R024	0.942541259437893	0.9296541959687	0.0482267672036924	0.0561651943524498	0.0532840138493302	0.0543631282452132
694	temnothorax	R	1	15	H1T001R005	0.944644317265995	0.924732964830946	0.0505086956804889	0.0509081519048181	0.0531923470594545	0.051325893730508
695	temnothorax	R	1	15	H1T001R007	0.942931183550827	0.929619874053891	0.0568262897873709	0.0565890508380314	0.0524673689470255	0.0533085164780019
696	temnothorax	R	1	15	H1T001R010	0.939838431788162	0.934657363154612	0.0513638314621435	0.0534267136451436	0.052792575592896	0.0532888400787478
697	temnothorax	R	1	15	H1T001R012	0.939450731653504	0.929656772516353	0.0501283356607847	0.0543643998333656	0.0522516873860418	0.0533194509624349
698	temnothorax	R	1	15	H36T001R005	0.938008974235855	0.931086670953736	0.0551840205197691	0.0532161120640933	0.0529076810740864	0.052719521308475
699	temnothorax	R	1	15	H36T001R011	0.946469591268011	0.929573666126179	0.0553487464683709	0.0514108054625697	0.0528827803618567	0.0538829558453035
700	temnothorax	R	1	15	H36T001R013	0.944212473270289	0.932078197462657	0.0492830002463242	0.0510946191303884	0.0524783850920084	0.0530768050084534
701	temnothorax	R	1	16	H16T001R002	0.888360720907629	0.875741868010713	0.0978709775107671	0.107852326923872	0.0998396003346728	0.10266692092383
702	temnothorax	R	1	16	H16T001R003	0.888954974033994	0.876248873526926	0.0937832592858637	0.101818421658018	0.100594184681056	0.102067392718084
703	temnothorax	R	1	16	H9T001R003	0.891446464554281	0.873896035475723	0.103239698228912	0.113897514910501	0.0991601439990203	0.112063290260754
704	temnothorax	R	1	16	H31T001R001	0.889606788253069	0.877147603225846	0.107701279134708	0.111399429547221	0.101213358346232	0.111361895927752
705	temnothorax	R	1	16	H31T001R002	0.886518071271232	0.875780326685705	0.114933429366983	0.104647841314843	0.100014534742456	0.109490255031632
706	temnothorax	R	1	16	H31T001R003	0.891412733417047	0.879047314130777	0.0957890199344401	0.112931434923211	0.100674377189258	0.11240036414745
707	temnothorax	R	1	16	H31T001R008	0.884159658035831	0.872857659569127	0.103234697673171	0.115033864939303	0.100956102739325	0.115973365647907
708	temnothorax	R	1	16	H31T001R015	0.896308584561133	0.881367942574835	0.0940360676046599	0.111576149974701	0.0998278867860915	0.112957769984646
709	temnothorax	R	1	16	H31T001R017	0.891901956079717	0.876124552062425	0.11000057059506	0.110125630853932	0.100145575725666	0.108170204253831
710	temnothorax	R	1	16	H14T001R002	0.893431128089159	0.880022580350767	0.0983464218076501	0.117856453149328	0.100712532692126	0.115736714137375
711	temnothorax	R	1	16	H14T001R005	0.890314799480518	0.87811687615497	0.102866446846121	0.117293690005613	0.101642814380526	0.113370402461604
712	temnothorax	R	1	16	H14T001R017	0.889606961721616	0.881960291411527	0.0944012853201671	0.104990400601128	0.100563543413258	0.105320907453693
713	temnothorax	R	1	16	H14T001R024	0.888089479238936	0.879368245330017	0.0953493906982665	0.113989334020154	0.0988483281780063	0.113892068364213
714	temnothorax	R	1	16	H1T001R005	0.892307459642679	0.871515373886926	0.0980724988077569	0.107684681073251	0.101837850980847	0.10959496281585
715	temnothorax	R	1	16	H1T001R007	0.886843125167657	0.872589944992373	0.10660476712852	0.113245226000644	0.100156575019842	0.111859571668135
716	temnothorax	R	1	16	H1T001R010	0.887547364004919	0.8782026507011	0.0999569688378377	0.114620092073641	0.0990538421407672	0.112102811437131
717	temnothorax	R	1	16	H1T001R012	0.886807564405709	0.875700920264316	0.0950173591371647	0.11343398898117	0.100043724660886	0.114108591399935
718	temnothorax	R	1	16	H36T001R005	0.886410855767317	0.876966598091504	0.101421723385816	0.111951193410091	0.101282572856328	0.111379099955016
719	temnothorax	R	1	16	H36T001R011	0.892655439462813	0.876365417297956	0.10091832988275	0.111801139231981	0.0990760893814879	0.114028793148563
720	temnothorax	R	1	16	H36T001R013	0.888539617873844	0.877869258503564	0.100480989651873	0.10883094383332	0.0996283623291726	0.111314690032486
721	temnothorax	R	1	17	H16T001R002	0.785514056231725	0.78155110955141	0.146690724182291	0.168427496731726	0.149672564561179	0.163507381681729
722	temnothorax	R	1	17	H16T001R003	0.790154497507828	0.789242041482962	0.140335071099148	0.162854616130421	0.148640492932658	0.163304288806397
723	temnothorax	R	1	17	H9T001R003	0.781785971229535	0.769480950857651	0.152793182742544	0.176889973578583	0.150535111892565	0.175803665097548
724	temnothorax	R	1	17	H31T001R001	0.783590482563792	0.771280148932342	0.157840880777858	0.174489393546774	0.148993703477906	0.175729212890817
725	temnothorax	R	1	17	H31T001R002	0.777512348006281	0.757688557277812	0.159339365605737	0.167839388660312	0.149186806393356	0.171376384310961
726	temnothorax	R	1	17	H31T001R003	0.780850240101589	0.786579860139226	0.142268412584456	0.177419332461416	0.149701340518302	0.174617655469294
727	temnothorax	R	1	17	H31T001R008	0.771294863220093	0.770666788710029	0.151786424067437	0.175636320689294	0.150120481566709	0.176903949506954
728	temnothorax	R	1	17	H31T001R015	0.784591491385023	0.789425859282171	0.144069890590281	0.17389564018456	0.14891612179365	0.17608980592211
729	temnothorax	R	1	17	H31T001R017	0.78223490551052	0.766793954158087	0.157543111190216	0.172354410399275	0.147667177423649	0.171426671832549
730	temnothorax	R	1	17	H14T001R002	0.772717029780721	0.781609503919226	0.146561279893276	0.176123319813062	0.149315096462602	0.179214168082476
731	temnothorax	R	1	17	H14T001R005	0.779551697486732	0.777549386849099	0.154776359774662	0.176948370790361	0.147824639350712	0.17643099869805
732	temnothorax	R	1	17	H14T001R017	0.780938472632046	0.789253710094113	0.145138010891309	0.167044115408299	0.149173252987608	0.167269960603094
733	temnothorax	R	1	17	H14T001R024	0.77489109123977	0.784081104197282	0.148062361683027	0.17454879740645	0.149770100441978	0.176049942995988
734	temnothorax	R	1	17	H1T001R005	0.782914188266811	0.779667759579604	0.147267621347854	0.169419983299062	0.150643737799392	0.173506553021195
735	temnothorax	R	1	17	H1T001R007	0.775109758356336	0.768996966687888	0.154744701348526	0.17477887674691	0.151086312144481	0.174736906647338
736	temnothorax	R	1	17	H1T001R010	0.775453831059073	0.77429651245634	0.149639996312056	0.174194606974332	0.148681326176439	0.175357726236031
737	temnothorax	R	1	17	H1T001R012	0.774450510204504	0.781926792988069	0.146236573081397	0.175239141527522	0.149699794111439	0.178405737289593
738	temnothorax	R	1	17	H36T001R005	0.772889901342703	0.775539122856213	0.149351899495092	0.1734514803252	0.150032252051099	0.171954376957389
739	temnothorax	R	1	17	H36T001R011	0.776904850927692	0.774195802831556	0.148059116479133	0.174812225297982	0.148526306111776	0.177415940532505
740	temnothorax	R	1	17	H36T001R013	0.775546899863602	0.7734105607899	0.150198350681149	0.175208974044347	0.150386297918769	0.174383716865927
741	temnothorax	R	1	18	H16T001R002	0.627938747674239	0.642695575572569	0.171216295542982	0.194320262689802	0.172793511845866	0.188947459981866
742	temnothorax	R	1	18	H16T001R003	0.632716857738023	0.654520726408396	0.167940585604404	0.189922687930192	0.174330414180721	0.190847433772108
743	temnothorax	R	1	18	H9T001R003	0.605599285511008	0.619866249092661	0.174009036154673	0.193273753112917	0.174447779290114	0.192279670102049
744	temnothorax	R	1	18	H31T001R001	0.604833870456384	0.615684327949683	0.179457236278269	0.187372119184329	0.173112146048456	0.191863931262519
745	temnothorax	R	1	18	H31T001R002	0.60816923627412	0.600703325645948	0.173874441073809	0.187310418647994	0.173168066765343	0.189483913275803
746	temnothorax	R	1	18	H31T001R003	0.604508313191463	0.651070242807775	0.171082642779321	0.193668308263928	0.174042432384348	0.191484475800453
747	temnothorax	R	1	18	H31T001R008	0.596183444440641	0.620225649012987	0.172125129557745	0.191161057632838	0.173142664188884	0.192045847020755
748	temnothorax	R	1	18	H31T001R015	0.607628428365052	0.645801064346805	0.172367618165273	0.193916212864314	0.172608125058244	0.193535601666284
749	temnothorax	R	1	18	H31T001R017	0.608575336890205	0.612235456927275	0.178677885840823	0.188960809601541	0.173004651772118	0.189293778484574
750	temnothorax	R	1	18	H14T001R002	0.593791642910096	0.633300388542542	0.1708971085757	0.188370181891258	0.172934929329873	0.192758488226004
751	temnothorax	R	1	18	H14T001R005	0.605532841052595	0.625940834928084	0.176835270496367	0.196801153803261	0.172999888756011	0.193552351617474
752	temnothorax	R	1	18	H14T001R017	0.617955101027093	0.6493139446422	0.172526659128287	0.189653800200603	0.17310623891441	0.190284246831405
753	temnothorax	R	1	18	H14T001R024	0.6003637462102	0.638186352386132	0.176090163621846	0.193746631182379	0.173401037413218	0.193072251653144
754	temnothorax	R	1	18	H1T001R005	0.610827957233412	0.637986255232835	0.173500220935728	0.187629006406903	0.172740323965255	0.192048960489597
755	temnothorax	R	1	18	H1T001R007	0.603246499706861	0.614221884851547	0.174388330631574	0.192597853892891	0.172739580425447	0.192048518252654
756	temnothorax	R	1	18	H1T001R010	0.601249126696596	0.624062642493735	0.175741258469001	0.189604527231443	0.172372668832711	0.190891395984449
757	temnothorax	R	1	18	H1T001R012	0.597170947548576	0.641218159756921	0.172644632222232	0.192047048985087	0.173770798549644	0.192739447469879
758	temnothorax	R	1	18	H36T001R005	0.600613452462114	0.624892109032095	0.169765097994415	0.18897132885583	0.174026990099213	0.187793157230547
759	temnothorax	R	1	18	H36T001R011	0.605341608976305	0.628159812592416	0.172914937659153	0.194825683791488	0.17314615973532	0.194490855910034
760	temnothorax	R	1	18	H36T001R013	0.603091842608577	0.629074224061913	0.175939873645598	0.190949063380846	0.173108708653288	0.192282606946196
761	temnothorax	R	1	19	H16T001R002	0.441465064889789	0.482873550767105	0.161594942561614	0.169235064647241	0.158900720422304	0.163991231334282
762	temnothorax	R	1	19	H16T001R003	0.439323036069607	0.495422807400128	0.164373401521022	0.163323665308473	0.159159399955802	0.164133011688334
763	temnothorax	R	1	19	H9T001R003	0.414677950330664	0.451516501986476	0.158331452215996	0.158087699174687	0.15938186314136	0.159895645065966
764	temnothorax	R	1	19	H31T001R001	0.416153967408612	0.444004090467257	0.161096349512092	0.158747185984807	0.159897866842853	0.160774558013399
765	temnothorax	R	1	19	H31T001R002	0.425478124948425	0.428725710406451	0.153778523672176	0.16045529318322	0.160084730491036	0.16283057842919
766	temnothorax	R	1	19	H31T001R003	0.418183179039883	0.485955702536894	0.162556459576793	0.164138606210615	0.159633688578007	0.162674481908059
767	temnothorax	R	1	19	H31T001R008	0.405759819198492	0.45287649784538	0.155397566724963	0.157170187657316	0.160177375460512	0.156629969379886
768	temnothorax	R	1	19	H31T001R015	0.415907295274557	0.477151088929565	0.165067965584871	0.16267808651464	0.159821759488324	0.162452808467021
769	temnothorax	R	1	19	H31T001R017	0.420869274641096	0.434427347017701	0.154688261522797	0.160337845640995	0.159515154063527	0.160071521777241
770	temnothorax	R	1	19	H14T001R002	0.399521720917745	0.462286102048125	0.156413848641118	0.156561496539082	0.159395198547793	0.15756652310215
771	temnothorax	R	1	19	H14T001R005	0.413524396812651	0.452209987457403	0.157525233270598	0.163508292185982	0.159113767984632	0.160693316319412
772	temnothorax	R	1	19	H14T001R017	0.433661223529951	0.480643597787299	0.162101493830412	0.16662871038704	0.159209185339517	0.164954179711999
773	temnothorax	R	1	19	H14T001R024	0.410635488499144	0.468071693677847	0.160961999964768	0.16368639660041	0.159294502536949	0.159643872179632
774	temnothorax	R	1	19	H1T001R005	0.420148304385519	0.469850203627445	0.164451757357121	0.159350438719276	0.15998942459601	0.161179733010561
775	temnothorax	R	1	19	H1T001R007	0.413989407840922	0.445788574106651	0.159073341532327	0.163757235488901	0.160350537280597	0.161027833736285
776	temnothorax	R	1	19	H1T001R010	0.415654559418446	0.447105268729122	0.1586709019495	0.157232989667057	0.160301973032867	0.160899828926865
777	temnothorax	R	1	19	H1T001R012	0.40543321169065	0.470565233199235	0.157490859577804	0.161862927899571	0.159838152182517	0.158727766660808
778	temnothorax	R	1	19	H36T001R005	0.418549085351513	0.455713894797316	0.158310835771009	0.161733552860367	0.160961843778013	0.158972359528377
779	temnothorax	R	1	19	H36T001R011	0.411508640334492	0.462437305395347	0.161456836658685	0.16155751277407	0.159856245200673	0.161023516746563
780	temnothorax	R	1	19	H36T001R013	0.41480769223924	0.459750413519297	0.160077525091393	0.158070894676598	0.159439153811948	0.161749519647085
781	temnothorax	R	1	20	H16T001R002	0.278668907696856	0.329830952177269	0.131056858066072	0.120890513545024	0.124271191854783	0.117176985232383
782	temnothorax	R	1	20	H16T001R003	0.280774584042603	0.343345476605921	0.132534463777	0.118645963249593	0.122202600503191	0.118551138253503
783	temnothorax	R	1	20	H9T001R003	0.256358374886833	0.300504028251556	0.122503255665048	0.110374130246569	0.123897290671093	0.111323441227923
784	temnothorax	R	1	20	H31T001R001	0.255433491483594	0.289516793721583	0.119806768867377	0.10805993557364	0.122919651925317	0.10977236184264
785	temnothorax	R	1	20	H31T001R002	0.266013859216323	0.283332170877416	0.117082141353433	0.112633972764586	0.122812928459001	0.114175293032029
786	temnothorax	R	1	20	H31T001R003	0.256496855515927	0.327778111721094	0.12708175757185	0.114404411011325	0.123168996326235	0.111020833367798
787	temnothorax	R	1	20	H31T001R008	0.249982207423762	0.298560529609803	0.119204077405471	0.107057652367608	0.124018514797238	0.106660049590858
788	temnothorax	R	1	20	H31T001R015	0.255910973182715	0.316553031379289	0.128082694542144	0.111250582490992	0.122313761721819	0.111482475472232
789	temnothorax	R	1	20	H31T001R017	0.262634112659618	0.284782561500352	0.115392474857006	0.111205337110375	0.12382740140826	0.112885577940562
790	temnothorax	R	1	20	H14T001R002	0.24683679975647	0.30377970248458	0.121017633821424	0.106705204642936	0.122552597656653	0.107952574598347
791	temnothorax	R	1	20	H14T001R005	0.252513100099492	0.295161117591927	0.119916515409337	0.112210921508988	0.123499510451208	0.10998566546828
792	temnothorax	R	1	20	H14T001R017	0.272848830407665	0.321566360448384	0.128042607359639	0.116226627745386	0.122830765385758	0.116542080159339
793	temnothorax	R	1	20	H14T001R024	0.253691695912941	0.313451846901282	0.127035909150035	0.112103866530672	0.122439221135611	0.109790836198539
794	temnothorax	R	1	20	H1T001R005	0.262120407612972	0.310961117403312	0.126533596633579	0.111251457015003	0.12244806193306	0.112932545797765
795	temnothorax	R	1	20	H1T001R007	0.253412178417295	0.293758884964089	0.121259891527138	0.110216622687914	0.123714627681342	0.109528564249733
796	temnothorax	R	1	20	H1T001R010	0.25749785649083	0.292589883243337	0.120487549916506	0.109478232758112	0.123075625773466	0.111038549248225
797	temnothorax	R	1	20	H1T001R012	0.249683012127182	0.314228631560192	0.123728047894997	0.11148394078286	0.123455367074931	0.108916079486945
798	temnothorax	R	1	20	H36T001R005	0.261818241545702	0.302235128099978	0.121546270963004	0.110825660146857	0.123406561305209	0.111053775531078
799	temnothorax	R	1	20	H36T001R011	0.250332828424936	0.306427396304149	0.12346539359363	0.109324145567378	0.123900660156627	0.109231882619092
800	temnothorax	R	1	20	H36T001R013	0.258108774866717	0.307636825253451	0.124439067837758	0.110793135212135	0.123414585086416	0.111536111852643
801	temnothorax	MR	1	1	H16T001R002	1.39200240321994	1.30901439286473	-0.000583947268807887	-4.09805645099095e-05	2.1168182484205e-05	1.59674208462324e-05
802	temnothorax	MR	1	1	H16T001R003	1.36119369421561	1.28302945612776	-0.000255822661901859	0.000454056223228382	1.31461508320419e-05	3.22881956984928e-05
803	temnothorax	MR	1	1	H9T001R003	1.45760812599352	1.28233191334145	0.000467375610635699	0.000151645188196749	2.09733869319594e-05	2.33436189751411e-05
804	temnothorax	MR	1	1	H31T001R001	1.37891315982721	1.23108110875407	0.000203953929058778	0.000161340047722861	9.7355676618697e-06	1.9824888567262e-05
805	temnothorax	MR	1	1	H31T001R002	1.35207326322597	1.20776339814483	0.000584431146555845	-8.17869341762348e-05	2.42658262253643e-05	2.53058043954041e-05
806	temnothorax	MR	1	1	H31T001R003	1.37328957753123	1.22279134706885	-1.40149352080503e-05	-1.88231536699257e-05	1.21188359066555e-05	1.92819848083745e-05
807	temnothorax	MR	1	1	H31T001R008	1.53225618939309	1.3023354095769	0.000449130385497977	0.000245328040946383	4.57241674149329e-05	1.92666053716586e-05
808	temnothorax	MR	1	1	H31T001R015	1.36700250398532	1.22888303726029	8.61251587672241e-05	0.000390103827438328	5.81985904345257e-06	1.73701029859461e-05
809	temnothorax	MR	1	1	H31T001R017	1.3722749699999	1.2293390052869	0.000604765252630636	-8.25493145385531e-06	2.01669449225263e-05	8.58324950121518e-06
810	temnothorax	MR	1	1	H14T001R002	1.36407702479465	1.15861078740616	0.000306955654520303	6.90187096617556e-05	1.26477043282701e-05	1.24702707178779e-05
811	temnothorax	MR	1	1	H14T001R005	1.3913113094944	1.21441882707705	-0.000232859377451361	-4.08768624760357e-05	9.06690190137881e-06	2.54031750508376e-05
812	temnothorax	MR	1	1	H14T001R017	1.3050182341958	1.14785489801381	0.000609308815310351	4.0355422857761e-06	2.67618113575329e-05	2.68281146427583e-05
813	temnothorax	MR	1	1	H14T001R024	1.45769131540261	1.2391613840676	-2.67075133283845e-05	0.000124701847608093	1.63383565092715e-05	8.792662617497e-06
814	temnothorax	MR	1	1	H1T001R005	1.34332411802792	1.18552664415455	0.000396135216185288	-4.14708325318149e-05	1.15453352059086e-05	-4.07153530883149e-07
815	temnothorax	MR	1	1	H1T001R007	1.40519700350289	1.27494932067677	0.000168028476625299	2.387205552407e-05	2.31945839494185e-05	8.55133686747779e-06
816	temnothorax	MR	1	1	H1T001R010	1.39537112280544	1.22155940232397	-5.10244043931106e-05	0.000130342524554837	1.46531770271597e-05	1.75755550874492e-05
817	temnothorax	MR	1	1	H1T001R012	1.41107913389265	1.2538650547055	0.0001285069075967	7.82636854037078e-05	1.26493549037221e-05	2.76942545380092e-05
818	temnothorax	MR	1	1	H36T001R005	1.38052602167166	1.21505407886265	0.000556046570649622	8.41716667315382e-05	1.79924628387475e-05	1.8257911935475e-05
819	temnothorax	MR	1	1	H36T001R011	1.34179622423185	1.18857484260251	0.000187723986615452	-7.9462499289492e-05	6.64308058571467e-06	9.82803009793046e-06
820	temnothorax	MR	1	1	H36T001R013	1.42683598776133	1.29536122895463	0.000361758465571759	0.000226470323319591	1.48211943355892e-05	1.91009688021689e-05
821	temnothorax	MR	1	2	H16T001R002	1.3713974174886	1.29242262873373	-0.000415076811064859	0.000164112347347692	4.21927050030131e-05	4.40663488732841e-05
822	temnothorax	MR	1	2	H16T001R003	1.34449701347291	1.26594084871388	-0.000123530548172851	0.000495796725355247	4.80468721249886e-05	3.09118851283291e-05
823	temnothorax	MR	1	2	H9T001R003	1.4304828404063	1.27586991974564	0.000465529580523989	0.000192817365816121	7.04939849301121e-05	5.6764907348325e-05
824	temnothorax	MR	1	2	H31T001R001	1.36092494514166	1.22585698896636	0.000102431652391557	0.000174110614873086	7.2648044180593e-05	5.49156740675447e-05
825	temnothorax	MR	1	2	H31T001R002	1.3337167384855	1.20200131466897	0.000579129820756092	4.90729598533833e-05	3.81841986658891e-05	2.32600056059134e-05
826	temnothorax	MR	1	2	H31T001R003	1.36159322386199	1.21701779876065	7.04402283074185e-05	-5.14692051688193e-05	8.12473265431146e-05	2.34332108930318e-05
827	temnothorax	MR	1	2	H31T001R008	1.49681953782788	1.29688406933186	0.00040517362003129	0.000210115530237579	8.06777677106933e-05	9.98713737972068e-05
828	temnothorax	MR	1	2	H31T001R015	1.35719694698518	1.22676949585501	0.000136939958082384	0.000367506814720037	3.01868352569514e-05	6.68637680305175e-05
829	temnothorax	MR	1	2	H31T001R017	1.35793903336038	1.22797544068285	0.000544986323960792	-3.41087233123212e-05	2.97810923504127e-05	4.47494705374464e-05
830	temnothorax	MR	1	2	H14T001R002	1.35406562952928	1.15427933448201	0.000290380223008401	3.17067975171381e-05	5.56806573207422e-05	3.98741941286582e-05
831	temnothorax	MR	1	2	H14T001R005	1.37175832448242	1.20964007392597	-0.000174506626687969	-7.7150991141625e-05	6.38844854597217e-05	5.53729002301824e-05
832	temnothorax	MR	1	2	H14T001R017	1.29497463651225	1.1433697302729	0.00053519214558512	3.71544181750481e-05	4.4480977446358e-05	4.60952161498907e-05
833	temnothorax	MR	1	2	H14T001R024	1.43951131381213	1.23671259975118	0.000184448412737717	0.000307512226344335	4.19309475893067e-05	5.14075506967657e-05
834	temnothorax	MR	1	2	H1T001R005	1.3255505558411	1.1802251693692	0.000464421279178965	6.82982545742271e-06	3.64355520687502e-05	3.91798120654729e-05
835	temnothorax	MR	1	2	H1T001R007	1.39409731138195	1.26992837337847	9.70844677279579e-05	8.47189391558996e-05	5.56665419683923e-05	5.14274638960347e-05
836	temnothorax	MR	1	2	H1T001R010	1.37253047480988	1.21877172510783	-5.90052868046607e-05	0.000213914981783097	7.5750592487469e-05	4.39238171218437e-05
837	temnothorax	MR	1	2	H1T001R012	1.39649071022966	1.24963893874029	0.000157048545457401	3.98077659686994e-05	4.18933115156202e-05	5.5598198866551e-05
838	temnothorax	MR	1	2	H36T001R005	1.36118595710347	1.20930612287207	0.000474400324293118	0.000140385747752716	5.5239893235992e-05	4.52953295030325e-05
839	temnothorax	MR	1	2	H36T001R011	1.32857478018832	1.18427190146771	0.000212869319168287	-4.28363836132843e-05	5.03505880226357e-05	3.76211820368147e-05
840	temnothorax	MR	1	2	H36T001R013	1.4164722066199	1.29133924006468	0.000370612471758297	9.92799626993359e-05	6.51193144710054e-05	6.03369292330556e-05
841	temnothorax	MR	1	3	H16T001R002	1.37227293808667	1.29219318620883	-0.000280678284659773	0.000410939836068029	0.000141071440522038	0.000166044973496329
842	temnothorax	MR	1	3	H16T001R003	1.34330284269613	1.26645610600482	-6.37552337068057e-05	0.00081526012429978	0.000150833916627086	0.000159660178728126
843	temnothorax	MR	1	3	H9T001R003	1.41826881877544	1.27271089889845	0.000899399619251354	0.000373613808920417	0.000189008304190156	0.000116735771343199
844	temnothorax	MR	1	3	H31T001R001	1.35165609791822	1.22330318244468	0.00024889937660106	0.000298760831950464	0.000155381896978101	0.000129613469535087
845	temnothorax	MR	1	3	H31T001R002	1.3244404282101	1.19949581634335	0.000694444983867614	0.000177136986273706	0.000154724682514247	0.000111731640718718
846	temnothorax	MR	1	3	H31T001R003	1.35509133641842	1.21490803625906	7.3405302449154e-05	-4.66832413588253e-05	0.000157958546482638	0.000143701399995024
847	temnothorax	MR	1	3	H31T001R008	1.47827412950594	1.29445112067379	0.000371307522800873	0.000438712465813163	0.000203130112697178	0.000220682895036911
848	temnothorax	MR	1	3	H31T001R015	1.35086002706836	1.22596903265675	0.000456351987505209	0.000303185993204809	0.000138637668698964	0.000157979992696839
849	temnothorax	MR	1	3	H31T001R017	1.34974056542132	1.22684604981975	0.000685855820400626	0.000150635857044778	0.000123555390505103	0.000115552829921139
850	temnothorax	MR	1	3	H14T001R002	1.34661230683491	1.15185342493687	0.000384828335022026	-3.08933697641626e-05	0.000148670339849698	0.000132573694410898
851	temnothorax	MR	1	3	H14T001R005	1.36006882655056	1.20785999843454	-2.07070667302663e-05	-0.000128709120744277	0.000166667143999975	0.000174041451737498
852	temnothorax	MR	1	3	H14T001R017	1.28972671385274	1.14176506671217	0.000561913619521216	5.95106948383312e-05	0.000115714794770202	9.45015371268716e-05
853	temnothorax	MR	1	3	H14T001R024	1.43040779233144	1.2357741793599	0.000180575179320737	0.000483563750585841	0.000139338978296521	0.000147452476106917
854	temnothorax	MR	1	3	H1T001R005	1.31520255617473	1.17752189591662	0.00059347021924126	5.26833185494899e-05	9.1641608525682e-05	8.96321282594177e-05
855	temnothorax	MR	1	3	H1T001R007	1.38754074079482	1.26649651938432	0.000164418116861828	0.000196118465540337	0.000117785412367067	0.000180534447590492
856	temnothorax	MR	1	3	H1T001R010	1.35618692263312	1.21537362239081	4.15806239827918e-06	0.000388167714868195	0.000191783371282597	0.000169401243787975
857	temnothorax	MR	1	3	H1T001R012	1.38710841460265	1.2483114347395	0.000291386389002022	0.000156342365140823	0.000141850478886311	0.000175424666819449
858	temnothorax	MR	1	3	H36T001R005	1.35089442194859	1.20727185776909	0.00030200976565026	7.05905122908016e-05	0.000148626908662247	0.000161129055611397
859	temnothorax	MR	1	3	H36T001R011	1.32150792466373	1.18221908200652	0.000253211532050221	-2.83809285766699e-05	0.000141909267830002	0.00014077045794835
860	temnothorax	MR	1	3	H36T001R013	1.40944293039671	1.28968567657	0.000546827934598363	0.000105194835739657	0.000156504653698708	0.00015080315779782
861	temnothorax	MR	1	4	H16T001R002	1.36472702427352	1.286642060001	7.89531117850948e-05	0.000618895797420678	0.00043120393765553	0.00041845436985596
862	temnothorax	MR	1	4	H16T001R003	1.33635254941952	1.26272034732941	0.000294381079680186	0.00104163878178329	0.000440723629087994	0.00040460614956052
863	temnothorax	MR	1	4	H9T001R003	1.41057797085574	1.27129259809703	0.00127790324408684	0.000766511852765901	0.000463740354441557	0.000538341735309408
864	temnothorax	MR	1	4	H31T001R001	1.34673539848171	1.22255610643123	0.000182083965082455	0.000456055384272423	0.000420403398181557	0.000460275057478357
865	temnothorax	MR	1	4	H31T001R002	1.32026877617729	1.19816876434586	0.000816327226220923	0.000290405750818018	0.000386653397413576	0.000381431904521913
866	temnothorax	MR	1	4	H31T001R003	1.35224269261897	1.21428129653767	0.000383141094203039	-7.58610415898069e-07	0.000361546223076327	0.000427832892078129
867	temnothorax	MR	1	4	H31T001R008	1.47006222120056	1.29348671264681	0.000580223964083327	0.00115579544046128	0.000590061568596419	0.000631069504938465
868	temnothorax	MR	1	4	H31T001R015	1.34858383672411	1.22583663063372	0.000718208285106599	0.000484337780058899	0.000379445072572814	0.000432019856943079
869	temnothorax	MR	1	4	H31T001R017	1.3470088820457	1.22644481773511	0.00103037115346978	0.000536908804671017	0.000496366939884506	0.000426504641011697
870	temnothorax	MR	1	4	H14T001R002	1.34223286786156	1.15004567504037	0.000385388676703776	-0.000108622181108405	0.000406521591803103	0.000392307750606849
871	temnothorax	MR	1	4	H14T001R005	1.35269706426552	1.20563062788461	0.000238054055711071	-0.00015286010996423	0.000449416013213113	0.000457964554339704
872	temnothorax	MR	1	4	H14T001R017	1.28841990297533	1.14050230126275	0.000586847220158796	0.000153777011627048	0.000335713458805782	0.000307828698101457
873	temnothorax	MR	1	4	H14T001R024	1.42748115272806	1.23576580686193	0.000249958797490729	0.00109138103139853	0.000446952422401369	0.000519977696093763
874	temnothorax	MR	1	4	H1T001R005	1.3106039668877	1.17621926673411	0.000771477250166766	0.00056361654902508	0.000424860631430959	0.000338246404348972
875	temnothorax	MR	1	4	H1T001R007	1.38256982658108	1.26549057339635	0.000408820213343914	0.00090948603415255	0.000468570597308586	0.000425359094347998
876	temnothorax	MR	1	4	H1T001R010	1.34792256799465	1.21479671653288	0.00030959526656691	0.000461299977937301	0.000481623706728281	0.000425192686002747
877	temnothorax	MR	1	4	H1T001R012	1.38317345693131	1.24772797574517	0.000680880546478268	0.000678958800356372	0.00039575288232081	0.000494667506011663
878	temnothorax	MR	1	4	H36T001R005	1.34465660021834	1.20617995319718	0.000575101322406002	0.000578219492748041	0.000450454300554729	0.000423650999865973
879	temnothorax	MR	1	4	H36T001R011	1.31789944068156	1.18074778753983	0.000231656751935745	0.000219980519355898	0.000352603342471837	0.000372344106802511
880	temnothorax	MR	1	4	H36T001R013	1.40757946687214	1.2891230185549	0.00122836755449485	0.000370243358367657	0.000455050395249944	0.000478375583714272
881	temnothorax	MR	1	5	H16T001R002	1.36363707605938	1.28532835554648	0.00114879486260398	0.00200077495305902	0.00137092345267221	0.00133312079028079
882	temnothorax	MR	1	5	H16T001R003	1.33546946855988	1.26218559511638	0.00142258148593812	0.0014069639758131	0.00140753731174655	0.00119963171302056
883	temnothorax	MR	1	5	H9T001R003	1.40586163864872	1.26964496541863	0.00309082139444038	0.00223920191103468	0.00150927551789388	0.00162009239392973
884	temnothorax	MR	1	5	H31T001R001	1.34364358226304	1.22105966856904	0.00138405142747177	0.0016118390453811	0.00140341081165632	0.00123672491009265
885	temnothorax	MR	1	5	H31T001R002	1.31766886236637	1.19673323629692	0.00183453754024471	0.000942143684507075	0.00117049348640952	0.00115002483577228
886	temnothorax	MR	1	5	H31T001R003	1.3502229206713	1.21368748496093	0.00101666555710068	0.00084873502792029	0.00139578407990823	0.00119574086074697
887	temnothorax	MR	1	5	H31T001R008	1.46598635869135	1.29227807458016	0.00169816944261329	0.00303857987317747	0.00159340091753352	0.00203425979611618
888	temnothorax	MR	1	5	H31T001R015	1.34649914454877	1.22611748969099	0.00196213306324823	0.00146344687977577	0.00121457034375088	0.00113628021773842
889	temnothorax	MR	1	5	H31T001R017	1.34479845808128	1.22526965862119	0.00185475017647788	0.00124393007675463	0.0012817376868812	0.00117613402815871
890	temnothorax	MR	1	5	H14T001R002	1.33906763441815	1.14897290947142	0.000546751717243517	0.000916818418602563	0.00131408723622226	0.00120495880739964
891	temnothorax	MR	1	5	H14T001R005	1.34841139852151	1.20448945581182	0.000799294625971372	0.000713208469279875	0.00133224393100912	0.00141860442781344
892	temnothorax	MR	1	5	H14T001R017	1.28782928409376	1.14020808064295	0.000759001932914886	0.000466833332431201	0.00123626745098916	0.000946465380840996
893	temnothorax	MR	1	5	H14T001R024	1.42559127589598	1.23530756673702	0.00124944895541584	0.00210261487763566	0.00138497546298201	0.00157465497418363
894	temnothorax	MR	1	5	H1T001R005	1.30840636275693	1.17536377919297	0.00201609404289649	0.00101954041824267	0.00115987351319431	0.00106418828427743
895	temnothorax	MR	1	5	H1T001R007	1.38025638673312	1.26454983344832	0.00120312515690564	0.00183214252587724	0.00129995769171045	0.00127972115561904
896	temnothorax	MR	1	5	H1T001R010	1.343474060249	1.21383006499668	0.00085818091455096	0.00147115297864597	0.0013936354570616	0.00141725369611222
897	temnothorax	MR	1	5	H1T001R012	1.38138899757809	1.24706882234228	0.00133316183169378	0.00161749313502142	0.00140317830601052	0.00146613092474511
898	temnothorax	MR	1	5	H36T001R005	1.34048468565634	1.20571977025335	0.00147893520128292	0.00144201481095041	0.00129636289909026	0.00126257549862152
899	temnothorax	MR	1	5	H36T001R011	1.31512514743596	1.17958914981246	0.000657791182070262	0.00112486554156066	0.00113092404263157	0.0010721583696365
900	temnothorax	MR	1	5	H36T001R013	1.40460087890192	1.28796709348762	0.0026812872812909	0.00127403063744141	0.00130201988963398	0.00154850674650915
901	temnothorax	MR	1	6	H16T001R002	1.36029651366682	1.28083064772422	0.00565816195249816	0.00453401257770973	0.00401220225290764	0.00390442690976644
902	temnothorax	MR	1	6	H16T001R003	1.33172581506638	1.25759743019083	0.00436535498037263	0.00411429372041151	0.00367990875555846	0.00337803464880819
903	temnothorax	MR	1	6	H9T001R003	1.401587206379	1.26662478004857	0.00679209916703664	0.00655608349197186	0.00444036200734951	0.00533330401551984
904	temnothorax	MR	1	6	H31T001R001	1.34011095927517	1.2183521302542	0.00421503142790613	0.00475340717281946	0.00442307862677319	0.00407579192508224
905	temnothorax	MR	1	6	H31T001R002	1.31499085877222	1.19411059731798	0.0034869623261498	0.00316905651787123	0.0043781145055936	0.00363749084821735
906	temnothorax	MR	1	6	H31T001R003	1.34805079253636	1.21165182309889	0.00265557796616734	0.00243850721079415	0.00463117878468887	0.00392076262557639
907	temnothorax	MR	1	6	H31T001R008	1.45826489195841	1.28935047695424	0.00645682615948146	0.00781410099665245	0.00488325911645763	0.00627635379352559
908	temnothorax	MR	1	6	H31T001R015	1.3447993243383	1.22518443792399	0.00332700328568517	0.00460162990237454	0.00418850809579866	0.0037132954238081
909	temnothorax	MR	1	6	H31T001R017	1.34176010266408	1.22334891138316	0.00472402895595754	0.00335942351339662	0.00414075990067944	0.00385207539048316
910	temnothorax	MR	1	6	H14T001R002	1.33557210194542	1.14724417120758	0.00174346397047271	0.00324848803946459	0.00384286421267381	0.00371370081405161
911	temnothorax	MR	1	6	H14T001R005	1.34317207171598	1.20138013284151	0.00353096988001876	0.00281528087736784	0.00491092275119556	0.00429571368803552
912	temnothorax	MR	1	6	H14T001R017	1.28637076275022	1.13873138208325	0.00179735006692307	0.00202607150342976	0.00383985654997371	0.00255036306320416
913	temnothorax	MR	1	6	H14T001R024	1.42262866383108	1.23464665633999	0.00376782229675986	0.00605388426986551	0.00463175841543586	0.004981024034958
914	temnothorax	MR	1	6	H1T001R005	1.30492068088718	1.17367329199831	0.00387878347003091	0.00351079610506606	0.00387004733847661	0.00320580014246714
915	temnothorax	MR	1	6	H1T001R007	1.37719775281888	1.26226700703546	0.00515304096068737	0.00477153965087341	0.00404347311502338	0.00421806419858762
916	temnothorax	MR	1	6	H1T001R010	1.33844689703599	1.21273096451892	0.0038990042179931	0.0040201620314097	0.00428709696466626	0.00406190102458087
917	temnothorax	MR	1	6	H1T001R012	1.37892752231508	1.24466578003381	0.00404730996431167	0.00504241116413917	0.00440688308786695	0.00454523138472957
918	temnothorax	MR	1	6	H36T001R005	1.3353180909761	1.20439493728234	0.00341484658096877	0.00459191737355249	0.00381387273116406	0.00362344158148611
919	temnothorax	MR	1	6	H36T001R011	1.31266941210741	1.17800049146631	0.00259213571676871	0.00303876126917615	0.00365295447974058	0.00320707409133657
920	temnothorax	MR	1	6	H36T001R013	1.40134237102061	1.28442747878941	0.00710491603300092	0.0041081516698492	0.00396776698104468	0.00460835628372164
921	temnothorax	MR	1	7	H16T001R002	1.35556398457711	1.27435217477241	0.0209801892119608	0.0149786482477212	0.0116940178293567	0.0120079282343917
922	temnothorax	MR	1	7	H16T001R003	1.32788375958392	1.25092698448659	0.0182488880070482	0.0137610186256208	0.0116001273929669	0.0109164068005468
923	temnothorax	MR	1	7	H9T001R003	1.39563814899512	1.26138279898135	0.0226779916859604	0.018972917956299	0.0146192274317513	0.0173380923483893
924	temnothorax	MR	1	7	H31T001R001	1.33615593605968	1.2143123879539	0.013974892785226	0.013436287378224	0.0129437435281886	0.0121298873769757
925	temnothorax	MR	1	7	H31T001R002	1.31017104728062	1.18996697932434	0.00844959055591466	0.00954234973028273	0.0126861937224773	0.0103832929166277
926	temnothorax	MR	1	7	H31T001R003	1.34470665172483	1.20573047084494	0.0100263093300369	0.0108439926720628	0.0107681260341762	0.0112760331506371
927	temnothorax	MR	1	7	H31T001R008	1.45039591175579	1.28272259532648	0.0200591364028128	0.0222035795456006	0.0143944355791174	0.0203301909306275
928	temnothorax	MR	1	7	H31T001R015	1.34140580786992	1.22104530827898	0.0105042846182225	0.0128700300114234	0.0124761868753745	0.0115582532940716
929	temnothorax	MR	1	7	H31T001R017	1.33816648806383	1.22028757026982	0.0117448090470688	0.0115534151703907	0.012942665559914	0.011605405037854
930	temnothorax	MR	1	7	H14T001R002	1.33034092858537	1.14405066438237	0.00730739605421058	0.0099832322218609	0.0125927970068137	0.0121004571847167
931	temnothorax	MR	1	7	H14T001R005	1.33936148520943	1.19647285633714	0.0123458889334861	0.00969549913682734	0.0119975821803882	0.0126642175537903
932	temnothorax	MR	1	7	H14T001R017	1.2828252156666	1.13643901139697	0.0056281478601226	0.00764739554092892	0.012355700043528	0.00831080939854813
933	temnothorax	MR	1	7	H14T001R024	1.41726599808692	1.23215351291027	0.0123438028895843	0.0169016068213174	0.013513104341405	0.0160773541171963
934	temnothorax	MR	1	7	H1T001R005	1.30013018547024	1.16969456953593	0.0109995897837496	0.00898170308456112	0.0135305379894244	0.0104735638515387
935	temnothorax	MR	1	7	H1T001R007	1.37187277840171	1.25687881495079	0.0164986607998939	0.0144907468721568	0.0128551850612014	0.0136070488265651
936	temnothorax	MR	1	7	H1T001R010	1.33290764258266	1.20938326756074	0.0116530513475838	0.0131647694999021	0.012563308994001	0.0129951303124728
937	temnothorax	MR	1	7	H1T001R012	1.37348643073943	1.24006535215914	0.0139196061204733	0.0139868580038878	0.0140394732157797	0.0142862827185104
938	temnothorax	MR	1	7	H36T001R005	1.32942014010467	1.20165572367671	0.010140672884556	0.0132084440166924	0.0128885347462992	0.0123081671865688
939	temnothorax	MR	1	7	H36T001R011	1.30876272120586	1.17408095867401	0.00850033081662127	0.00851017855487961	0.011813974575947	0.0105428628909394
940	temnothorax	MR	1	7	H36T001R013	1.39466724746983	1.27807985999684	0.020638215824	0.0162380422305669	0.013754522869414	0.014740120084736
941	temnothorax	MR	1	8	H16T001R002	1.34332593429386	1.2511964318302	0.0473718656758801	0.0446352337175308	0.0277938598847081	0.0354204448164586
942	temnothorax	MR	1	8	H16T001R003	1.31537265539053	1.2278080155335	0.0440537430802029	0.0388598827562811	0.0263359811076708	0.0303122888748885
943	temnothorax	MR	1	8	H9T001R003	1.37868327321448	1.23696344228109	0.0454459440754414	0.0548836749097659	0.0319641595168246	0.0502596759979969
944	temnothorax	MR	1	8	H31T001R001	1.32290714796733	1.20067528151061	0.0315265633883341	0.0377501730058554	0.0277779367357827	0.0326053970895534
945	temnothorax	MR	1	8	H31T001R002	1.29990284068876	1.18281234613096	0.0221690657858979	0.0282746108686202	0.0296245725264077	0.0294845278280242
946	temnothorax	MR	1	8	H31T001R003	1.33346346184571	1.19397310397034	0.0261952626261317	0.0332707080258261	0.0295714839282296	0.0345330516197511
947	temnothorax	MR	1	8	H31T001R008	1.42689913579499	1.26406007927113	0.0518478777948419	0.0687645424965768	0.0337855847275157	0.0594083726630572
948	temnothorax	MR	1	8	H31T001R015	1.33199931476408	1.21027416784491	0.0260797162747003	0.0373723561445486	0.0273091001383969	0.0322386549364276
949	temnothorax	MR	1	8	H31T001R017	1.32614067973972	1.20998138924036	0.0275728222097554	0.0318307729145258	0.031976892116051	0.0344856844518683
950	temnothorax	MR	1	8	H14T001R002	1.31659181588541	1.13533226108716	0.0163666344494503	0.0299197060015674	0.0316578958775672	0.0345687503664022
951	temnothorax	MR	1	8	H14T001R005	1.32476547729808	1.18432902911227	0.0280611942370516	0.0351733542613081	0.0296517034086799	0.0375581086556068
952	temnothorax	MR	1	8	H14T001R017	1.27478595346007	1.13145750824736	0.0129810674946217	0.0203098093287678	0.0237359570728614	0.0219986644176507
953	temnothorax	MR	1	8	H14T001R024	1.40188384705983	1.21944306409127	0.0287596397993389	0.0504469667153253	0.0317892704478139	0.0471347198772886
954	temnothorax	MR	1	8	H1T001R005	1.28783199028471	1.16020871468154	0.0220450793767257	0.0265753203087169	0.0291627286036756	0.0289031182175914
955	temnothorax	MR	1	8	H1T001R007	1.35907394845919	1.24133335211634	0.0367360658416652	0.0456778496827775	0.0300090360505915	0.039555603546091
956	temnothorax	MR	1	8	H1T001R010	1.31918852855572	1.1981694960501	0.0274630599572332	0.0384645243497706	0.0302828969465364	0.0376613613151759
957	temnothorax	MR	1	8	H1T001R012	1.36137903037169	1.2261333951981	0.0311137566972627	0.0422187617402319	0.0270749687635034	0.0382460067329822
958	temnothorax	MR	1	8	H36T001R005	1.31716212791851	1.19144454443575	0.0244760599524787	0.0362562542501399	0.0319321114921063	0.0364696889258403
959	temnothorax	MR	1	8	H36T001R011	1.29741117051087	1.1655370243478	0.0201238983126289	0.0268056798303167	0.0260831778182092	0.0282088323087432
960	temnothorax	MR	1	8	H36T001R013	1.37893367138078	1.25917871530884	0.0487510796947843	0.0512713358311307	0.029583164331222	0.0422220903511878
961	temnothorax	MR	1	9	H16T001R002	1.30025055391489	1.2034089899062	0.0772597018137526	0.101779101638447	0.0449889361506277	0.0840215769330662
962	temnothorax	MR	1	9	H16T001R003	1.27963054637125	1.18418928285068	0.0734863153842169	0.0875835799131961	0.0444486550859252	0.0744471398941888
963	temnothorax	MR	1	9	H9T001R003	1.31624962321531	1.19325824501592	0.0684056355890883	0.132996745357151	0.0532544335854681	0.118704021273054
964	temnothorax	MR	1	9	H31T001R001	1.28702236609741	1.1721379394147	0.0510357733789808	0.0850777996890014	0.0473797051063858	0.0793261475893378
965	temnothorax	MR	1	9	H31T001R002	1.26449120607506	1.16121852239062	0.038799136908947	0.0729616676596231	0.0486313609840174	0.0702375723026214
966	temnothorax	MR	1	9	H31T001R003	1.29619099303496	1.16760453520715	0.0471358357701527	0.0844404960779829	0.0503751483487974	0.0834649455595959
967	temnothorax	MR	1	9	H31T001R008	1.35143190643417	1.21329946793673	0.0818739712380734	0.157276362835511	0.0529129532958786	0.139484418425903
968	temnothorax	MR	1	9	H31T001R015	1.29293653187522	1.18656402001187	0.0466444978100383	0.0832321607208417	0.0523799727678999	0.0775278551770808
969	temnothorax	MR	1	9	H31T001R017	1.29224130797176	1.18280486788464	0.0473340892108692	0.0824222080103221	0.0511537110273268	0.0801084327745966
970	temnothorax	MR	1	9	H14T001R002	1.27736856768923	1.12085786541306	0.0282018123556752	0.0775573768727398	0.0482345931849679	0.0811336110218747
971	temnothorax	MR	1	9	H14T001R005	1.28245687486633	1.15343971197029	0.0457028540597601	0.0885545960510563	0.0496063713738042	0.0880103117845488
972	temnothorax	MR	1	9	H14T001R017	1.24975546664432	1.11952332123284	0.025862667505877	0.0497916302352898	0.0513623710247744	0.0555357411110322
973	temnothorax	MR	1	9	H14T001R024	1.34900751751045	1.18960409379405	0.0530449630144506	0.11825458424872	0.0589016661291531	0.117311996675395
974	temnothorax	MR	1	9	H1T001R005	1.25659148096525	1.13917453119279	0.0348608753125156	0.0674153995793981	0.0476875917782751	0.0679624447845785
975	temnothorax	MR	1	9	H1T001R007	1.31536096052299	1.20443821561723	0.0630317772368149	0.104005587887198	0.054644079382581	0.095535915106816
976	temnothorax	MR	1	9	H1T001R010	1.27419211913746	1.17165192460052	0.0506906575191357	0.0950192071334722	0.0516039856434833	0.0886136566094231
977	temnothorax	MR	1	9	H1T001R012	1.3147514135276	1.19544570446566	0.0535382046440719	0.0982946665447914	0.0522580530054899	0.0951093182647588
978	temnothorax	MR	1	9	H36T001R005	1.27637730770083	1.16774365798717	0.0455431045394809	0.0899271946751676	0.0458633180596492	0.0855795459149874
979	temnothorax	MR	1	9	H36T001R011	1.26316541564458	1.14639549910287	0.0353993126170282	0.0695664717704406	0.0473074969210944	0.0698715993494634
980	temnothorax	MR	1	9	H36T001R013	1.32759541719709	1.21648976526443	0.0826686479307833	0.116757391575753	0.0499610616289431	0.102710651182073
981	temnothorax	MR	1	10	H16T001R002	1.19440947875161	1.13116058615598	0.103763434659722	0.150728124602333	0.0692930049727959	0.133964992497183
982	temnothorax	MR	1	10	H16T001R003	1.19171730462907	1.11283212538433	0.0882050278553371	0.135204587449102	0.0679107811225781	0.120553809952043
983	temnothorax	MR	1	10	H9T001R003	1.1617099457169	1.12964534906976	0.0907264799319771	0.184276564852217	0.0725655009153827	0.168421818074059
984	temnothorax	MR	1	10	H31T001R001	1.19065149456039	1.12221223072882	0.0724275587809553	0.132466606856115	0.0772485987153734	0.129057054061296
985	temnothorax	MR	1	10	H31T001R002	1.17666662079245	1.12840111539229	0.0607658936891648	0.109104237729621	0.0687725884125471	0.110098243708264
986	temnothorax	MR	1	10	H31T001R003	1.19563034992267	1.12103606896811	0.0688223539074024	0.129612302602389	0.069654956412099	0.12742398294323
987	temnothorax	MR	1	10	H31T001R008	1.16564394914691	1.13649003707967	0.114524342179602	0.214790223181196	0.0839918656871599	0.20069644648157
988	temnothorax	MR	1	10	H31T001R015	1.20128179770743	1.14439935749104	0.0714266242204672	0.126346623191597	0.0680580937296986	0.122258481274575
989	temnothorax	MR	1	10	H31T001R017	1.19697088000545	1.14092247006669	0.0706878028587762	0.126409181330922	0.0719391091894149	0.125161110211138
990	temnothorax	MR	1	10	H14T001R002	1.17440648744727	1.09822546647746	0.0409844496823298	0.118496822555512	0.0743693212946172	0.125397032375538
991	temnothorax	MR	1	10	H14T001R005	1.17396870807963	1.11302553869312	0.0651767375630328	0.134464095499173	0.0722495319388471	0.133823266079385
992	temnothorax	MR	1	10	H14T001R017	1.18738467408151	1.09638072128825	0.0401615839992439	0.0851930312540367	0.0661344691351935	0.0926883403106748
993	temnothorax	MR	1	10	H14T001R024	1.20065815859501	1.14029301549645	0.0775641055397997	0.175313803384889	0.0771936905339054	0.171498939681891
994	temnothorax	MR	1	10	H1T001R005	1.17453886734444	1.10774633888566	0.0481449266294441	0.105518216357136	0.0769856014489062	0.109584978282105
995	temnothorax	MR	1	10	H1T001R007	1.19881052509067	1.14170819470517	0.0900254516803825	0.154400937951788	0.0715542725832528	0.143079617941871
996	temnothorax	MR	1	10	H1T001R010	1.16214790680639	1.12670125001462	0.0719386867027837	0.137096747918547	0.0698640040032314	0.129581117963705
997	temnothorax	MR	1	10	H1T001R012	1.19659429099319	1.14124298598663	0.0831820271686403	0.150615467380263	0.0789676462894638	0.14482023618047
998	temnothorax	MR	1	10	H36T001R005	1.1677002653097	1.12772538727984	0.0683743566889007	0.134049515442354	0.0752456887865381	0.129735950517036
999	temnothorax	MR	1	10	H36T001R011	1.18039091917033	1.1110080496305	0.0537237149365101	0.10813765075118	0.0660078571171152	0.109727585547161
1000	temnothorax	MR	1	10	H36T001R013	1.19792652762278	1.13778366569513	0.108249338227243	0.176251581992694	0.0750615578945366	0.159763521885621
1001	temnothorax	MR	1	11	H16T001R002	1.03467714507513	1.02887862926233	0.118199571957724	0.165505576247229	0.097011395339269	0.153395077080118
1002	temnothorax	MR	1	11	H16T001R003	1.04696654684695	1.0207122888267	0.106212983325522	0.149439191304299	0.0925312935264237	0.139590736265168
1003	temnothorax	MR	1	11	H9T001R003	0.9534909538583	1.04917743358923	0.119937514594234	0.17189809596669	0.100714632978041	0.163421761685051
1004	temnothorax	MR	1	11	H31T001R001	1.04110461360406	1.05763895292137	0.0927270695986248	0.144831906603858	0.0960870155255188	0.144454033179318
1005	temnothorax	MR	1	11	H31T001R002	1.05194240886587	1.077906468502	0.0827897699778576	0.129891608789546	0.0938106436802979	0.130624849416627
1006	temnothorax	MR	1	11	H31T001R003	1.04635502612771	1.05481341360236	0.0906813229443926	0.148487261691776	0.0951816338499951	0.146634058859965
1007	temnothorax	MR	1	11	H31T001R008	0.92419120167156	1.0410514322551	0.142976631285699	0.203065585630439	0.102655008780859	0.189487948841662
1008	temnothorax	MR	1	11	H31T001R015	1.05984249497568	1.07954955027779	0.0995353003191125	0.145302409238262	0.0910042273901761	0.144639941236406
1009	temnothorax	MR	1	11	H31T001R017	1.05226236231479	1.07618155648931	0.0975973669231502	0.14274122383513	0.0927259713603764	0.143354049199529
1010	temnothorax	MR	1	11	H14T001R002	1.02716847257208	1.06069219910902	0.0589835265997705	0.128717939535494	0.0950109407316021	0.135637051039871
1011	temnothorax	MR	1	11	H14T001R005	1.01418756749886	1.05378330350183	0.0864373660680109	0.141557656451962	0.0985590605923647	0.142260030948232
1012	temnothorax	MR	1	11	H14T001R017	1.08421576943059	1.05812092214632	0.0570881223709422	0.109703358211655	0.088108583746575	0.120891857273677
1013	temnothorax	MR	1	11	H14T001R024	0.995659397956524	1.07454025509878	0.109424599294688	0.183578317339103	0.100130968458761	0.180974193740252
1014	temnothorax	MR	1	11	H1T001R005	1.05251679995101	1.06549171965028	0.0695125121267054	0.124629182109361	0.0933043529231423	0.125996853243023
1015	temnothorax	MR	1	11	H1T001R007	1.03097950580712	1.05769461741965	0.118310036936225	0.16804162779301	0.0951037135586773	0.158491453584138
1016	temnothorax	MR	1	11	H1T001R010	1.0088053084725	1.06253022354574	0.0953744024475017	0.145868098011478	0.0970332294228533	0.140287805569331
1017	temnothorax	MR	1	11	H1T001R012	1.02836654778183	1.06451387921328	0.108030394025187	0.165567869598846	0.0978590850215777	0.159942457297889
1018	temnothorax	MR	1	11	H36T001R005	1.01405166443371	1.06776275963287	0.0918993558887059	0.140820061467176	0.0891279997483768	0.136859656802524
1019	temnothorax	MR	1	11	H36T001R011	1.05277264999185	1.06387798823424	0.0735476020662172	0.12529562086737	0.0963294117539521	0.130159693075756
1020	temnothorax	MR	1	11	H36T001R013	1.0032491549475	1.03695149559484	0.127399471070125	0.182874239033875	0.10041151919037	0.169574063653403
1021	temnothorax	MR	1	12	H16T001R002	0.86251922695208	0.915782925041382	0.135253562322028	0.160251017342135	0.117408832791915	0.154215349626333
1022	temnothorax	MR	1	12	H16T001R003	0.891409476045505	0.92448705946143	0.119888942924873	0.149954981138414	0.118937835358165	0.147386373683878
1023	temnothorax	MR	1	12	H9T001R003	0.76295061071716	0.946781229859206	0.144079286916911	0.149825462453516	0.130210906907861	0.143627970071826
1024	temnothorax	MR	1	12	H31T001R001	0.882646740150216	0.974515824128855	0.114159936582401	0.146644828433113	0.120622114580182	0.151246998975097
1025	temnothorax	MR	1	12	H31T001R002	0.911770466386377	1.00318723268071	0.110141790575236	0.141660384190876	0.115402640660726	0.141316523468154
1026	temnothorax	MR	1	12	H31T001R003	0.882685322179644	0.971854360641961	0.111096362252153	0.148838924107305	0.115700045454599	0.15141978518809
1027	temnothorax	MR	1	12	H31T001R008	0.703269942822751	0.922950456417345	0.163518401359069	0.166298942785591	0.134685284904557	0.16266602329856
1028	temnothorax	MR	1	12	H31T001R015	0.89800546045055	0.986906315362089	0.123520156769155	0.155525509107904	0.117390332850045	0.155258981385471
1029	temnothorax	MR	1	12	H31T001R017	0.892503594804526	0.989224296152964	0.126110773786829	0.150708433823832	0.120260287419931	0.154569148763017
1030	temnothorax	MR	1	12	H14T001R002	0.874377188649033	1.00900504041869	0.0802820841238905	0.127998268762322	0.121347676701144	0.138208132513036
1031	temnothorax	MR	1	12	H14T001R005	0.852961338712684	0.982260363830764	0.108168934595936	0.136280286555959	0.122391600862807	0.139678957326706
1032	temnothorax	MR	1	12	H14T001R017	0.953538060332825	1.00897378598589	0.0815893845701762	0.124883021659468	0.110500615311947	0.137450852150397
1033	temnothorax	MR	1	12	H14T001R024	0.784496580066902	0.985525754756492	0.139893010314741	0.170154130605784	0.118518633806142	0.165554571415332
1034	temnothorax	MR	1	12	H1T001R005	0.916994796429408	1.00038253497664	0.0933426986748366	0.132709534696756	0.112752497622186	0.136588582814176
1035	temnothorax	MR	1	12	H1T001R007	0.849929637453468	0.951745270941512	0.139900839319412	0.158969928864465	0.117604486401565	0.156780574958981
1036	temnothorax	MR	1	12	H1T001R010	0.854044370837968	0.980044673545445	0.116747273156696	0.138494537943162	0.121047755470511	0.138608227147359
1037	temnothorax	MR	1	12	H1T001R012	0.848763143609753	0.967576539165659	0.130565289295408	0.162041107002803	0.118087063124909	0.158561524614522
1038	temnothorax	MR	1	12	H36T001R005	0.859510244503591	0.988398169618154	0.112587309303237	0.138090238662961	0.119250783385899	0.137762243898534
1039	temnothorax	MR	1	12	H36T001R011	0.914018405270768	0.998043377357773	0.0979460981929739	0.133295098619167	0.112929663515613	0.138345690098946
1040	temnothorax	MR	1	12	H36T001R013	0.80341881724114	0.921506272601404	0.147594151592783	0.166869306994603	0.120018861018698	0.155936482404061
1041	temnothorax	MR	1	13	H16T001R002	0.695067819779099	0.785117157586529	0.143576546402617	0.150592271002935	0.136030668443405	0.149612692602705
1042	temnothorax	MR	1	13	H16T001R003	0.73938646598807	0.807695487601808	0.131971716784495	0.148051447830229	0.132442108497124	0.14937387775309
1043	temnothorax	MR	1	13	H9T001R003	0.60210154664567	0.828266501526073	0.162433957007364	0.131538465626166	0.149074899965751	0.126301859443428
1044	temnothorax	MR	1	13	H31T001R001	0.721261872197778	0.872936260030228	0.13536217842716	0.142862698111914	0.141258856199219	0.149375305271322
1045	temnothorax	MR	1	13	H31T001R002	0.766702652521214	0.911794761633078	0.134728547397001	0.142814163391034	0.1352724119822	0.148063091149124
1046	temnothorax	MR	1	13	H31T001R003	0.72445985739153	0.868123880538812	0.128113516486085	0.146394778141156	0.136492187227489	0.151298737908549
1047	temnothorax	MR	1	13	H31T001R008	0.51714809920327	0.794398350347224	0.173534172774157	0.132144695432962	0.157482590398343	0.132244357235171
1048	temnothorax	MR	1	13	H31T001R015	0.734621803051208	0.876926539073083	0.14545513677863	0.154261199854577	0.135198865723768	0.157047585917138
1049	temnothorax	MR	1	13	H31T001R017	0.729004828159687	0.878919883492861	0.142989011402228	0.145575755802096	0.136537249047177	0.153311984514598
1050	temnothorax	MR	1	13	H14T001R002	0.730347408796163	0.941747253511758	0.108011980225273	0.126279701076069	0.133791024325969	0.136594074223693
1051	temnothorax	MR	1	13	H14T001R005	0.704774409949306	0.891045535562612	0.131104547859184	0.132131331184733	0.133267625367316	0.133584684328333
1052	temnothorax	MR	1	13	H14T001R017	0.817052759128794	0.936851234454007	0.104283493367428	0.138397906330311	0.131357215585955	0.151083860279214
1053	temnothorax	MR	1	13	H14T001R024	0.599272847901509	0.866839742957032	0.160242080509811	0.148928491838072	0.143677136879236	0.149048178907457
1054	temnothorax	MR	1	13	H1T001R005	0.777717985462267	0.921412671948373	0.119147627914127	0.138420939136636	0.134125405065408	0.144734011367865
1055	temnothorax	MR	1	13	H1T001R007	0.676435948488542	0.828947542327327	0.154600141017246	0.150873043734572	0.137121301322577	0.147957963097042
1056	temnothorax	MR	1	13	H1T001R010	0.707963951315788	0.881723756290564	0.138821821967451	0.131827881528651	0.143228951478643	0.136577820914354
1057	temnothorax	MR	1	13	H1T001R012	0.677307947690326	0.85378631030874	0.148156472722031	0.149651685798592	0.138307379507201	0.150736021976237
1058	temnothorax	MR	1	13	H36T001R005	0.710037576182331	0.891689106081191	0.134434940099992	0.128663951307762	0.139110850810563	0.133303574573788
1059	temnothorax	MR	1	13	H36T001R011	0.768243458340427	0.913865367968941	0.120459380383019	0.135329772168577	0.13698694312739	0.144109919490713
1060	temnothorax	MR	1	13	H36T001R013	0.631947884605454	0.790842852434328	0.150049729072736	0.148613942787493	0.138711264878358	0.143079351722238
1061	temnothorax	MR	1	14	H16T001R002	0.536231235174582	0.65218306608251	0.142767315731266	0.134662124219512	0.149082947359513	0.13593333496037
1062	temnothorax	MR	1	14	H16T001R003	0.581836230205009	0.687597044304221	0.134467112942646	0.134770377826267	0.146430822196688	0.14000050528308
1063	temnothorax	MR	1	14	H9T001R003	0.471791208445375	0.698317318571926	0.170518788118892	0.121916990550782	0.161044560990558	0.115048197912334
1064	temnothorax	MR	1	14	H31T001R001	0.56830642483562	0.758252417862833	0.150108071719629	0.131556039541507	0.151204022556067	0.139572444527848
1065	temnothorax	MR	1	14	H31T001R002	0.618649948918605	0.796228126125841	0.155363696959475	0.137811905312579	0.146936292680458	0.145566985248044
1066	temnothorax	MR	1	14	H31T001R003	0.56267543160625	0.755298601756327	0.142566446163216	0.137256537212642	0.148932600965704	0.141374859225189
1067	temnothorax	MR	1	14	H31T001R008	0.37081821589666	0.653667373223743	0.172190479542733	0.106141729047845	0.169842979040675	0.106206380643941
1068	temnothorax	MR	1	14	H31T001R015	0.571916448073795	0.746339108677612	0.15414799507539	0.146076664165588	0.148720861638176	0.147028456311913
1069	temnothorax	MR	1	14	H31T001R017	0.570437169350376	0.752199500242239	0.156880485699137	0.137489367470546	0.148051865485203	0.144248689154514
1070	temnothorax	MR	1	14	H14T001R002	0.588986663134413	0.851302517305203	0.134237981912401	0.125825861933231	0.147420344330512	0.135940169704075
1071	temnothorax	MR	1	14	H14T001R005	0.567194581166907	0.784885572521965	0.153440553641342	0.132457361039084	0.153001919883424	0.133343563953804
1072	temnothorax	MR	1	14	H14T001R017	0.667788609550253	0.852174046799502	0.123837100666183	0.141346629389606	0.141502455009702	0.153522864782904
1073	temnothorax	MR	1	14	H14T001R024	0.434954042371727	0.734776556835622	0.172325153760322	0.123826448777569	0.160383921812505	0.123608821045592
1074	temnothorax	MR	1	14	H1T001R005	0.63196883771795	0.812804527513983	0.139908426369907	0.138174410055415	0.147966671805675	0.144644678478726
1075	temnothorax	MR	1	14	H1T001R007	0.51789834139132	0.697623499727009	0.161339888670073	0.137243575660159	0.151894348647614	0.135382477615591
1076	temnothorax	MR	1	14	H1T001R010	0.571763479035162	0.768304454271306	0.154808203593081	0.123753306868041	0.153720722424062	0.133449630655051
1077	temnothorax	MR	1	14	H1T001R012	0.516155082215783	0.723215522390761	0.157392363030129	0.134378292755272	0.152530692222506	0.136615118001508
1078	temnothorax	MR	1	14	H36T001R005	0.576576910559793	0.77587937333894	0.15074694658951	0.124448591108922	0.14979672704233	0.130397255312003
1079	temnothorax	MR	1	14	H36T001R011	0.622449706367837	0.810019063228887	0.142996945723874	0.130577930130432	0.145049341176787	0.142510922615978
1080	temnothorax	MR	1	14	H36T001R013	0.476152940867963	0.655485372742489	0.149374972140322	0.126815669597349	0.153969782804544	0.126025702396784
1081	temnothorax	MR	1	15	H16T001R002	0.398851870502581	0.520947405565762	0.133705928976046	0.11798952458891	0.157946811141718	0.119445637161101
1082	temnothorax	MR	1	15	H16T001R003	0.439287420702923	0.561616741563311	0.13095526548737	0.120289176762904	0.157583068604617	0.12655725174184
1083	temnothorax	MR	1	15	H9T001R003	0.355621266957011	0.561267870423823	0.166964631056204	0.107971899615659	0.170789516487794	0.105159851487748
1084	temnothorax	MR	1	15	H31T001R001	0.422311869394834	0.634376909196714	0.158287203933697	0.119245483471442	0.160452280258185	0.126222962299795
1085	temnothorax	MR	1	15	H31T001R002	0.472215833780652	0.667632790962317	0.173079343134971	0.128460729993804	0.156292489318386	0.13855811250665
1086	temnothorax	MR	1	15	H31T001R003	0.417340493857868	0.633392236924187	0.152478461972605	0.119835940235944	0.156234599972851	0.125597935124969
1087	temnothorax	MR	1	15	H31T001R008	0.254843983415259	0.524699090394243	0.164808610703565	0.0850485708368096	0.181817935129229	0.0835871489773832
1088	temnothorax	MR	1	15	H31T001R015	0.422510716946863	0.61176899540933	0.156197940450927	0.12686690364934	0.157037355311603	0.129627736367584
1089	temnothorax	MR	1	15	H31T001R017	0.420859059585893	0.618421407668281	0.162041765385728	0.121967324087112	0.154787003664507	0.127890763704863
1090	temnothorax	MR	1	15	H14T001R002	0.453191928300849	0.742555284518647	0.166031286859946	0.122432967403171	0.151839404972134	0.132440982324103
1091	temnothorax	MR	1	15	H14T001R005	0.429576512077586	0.658813530436241	0.165224518264289	0.123116405821567	0.161200187855028	0.125769250855271
1092	temnothorax	MR	1	15	H14T001R017	0.512753520618971	0.746989807785051	0.146779959858329	0.133223341145083	0.150654264497046	0.145036766007041
1093	temnothorax	MR	1	15	H14T001R024	0.301405558000613	0.598555895063534	0.173135146863128	0.0972186670108847	0.167718531479742	0.0980042159171127
1094	temnothorax	MR	1	15	H1T001R005	0.486956219693802	0.692584093897518	0.15847094310614	0.132103225616592	0.153100393360358	0.139320201284809
1095	temnothorax	MR	1	15	H1T001R007	0.37541238265466	0.557706278525074	0.15465065614777	0.117494617586095	0.160173394986656	0.118825874533596
1096	temnothorax	MR	1	15	H1T001R010	0.438872570927615	0.643402370928788	0.167256233346598	0.120388940751097	0.161714691274285	0.125958543244053
1097	temnothorax	MR	1	15	H1T001R012	0.368460905669742	0.580728752310939	0.151529300939629	0.115802613049439	0.158775194131771	0.116563301367721
1098	temnothorax	MR	1	15	H36T001R005	0.44308259636416	0.648262810774204	0.157532015410881	0.116553656708928	0.158439502243759	0.124972217697042
1099	temnothorax	MR	1	15	H36T001R011	0.480308597312266	0.694359462337138	0.159478387805862	0.128648053851275	0.151854818939306	0.139247960272964
1100	temnothorax	MR	1	15	H36T001R013	0.344461077274925	0.52378662375312	0.137269370331862	0.105227917715629	0.164276728572256	0.107004274264409
1101	temnothorax	MR	1	16	H16T001R002	0.278916298979846	0.401703997173133	0.123521803127007	0.097625015837154	0.160345517334108	0.0995717744802922
1102	temnothorax	MR	1	16	H16T001R003	0.311674373386915	0.443947559345053	0.126592209922786	0.101849399588905	0.155311800920482	0.107720306739042
1103	temnothorax	MR	1	16	H9T001R003	0.247758076907951	0.429247010724135	0.158065772403472	0.088588284663395	0.171507011775981	0.0886637927047632
1104	temnothorax	MR	1	16	H31T001R001	0.295587164897214	0.505968164851535	0.162015025438021	0.099942639860897	0.157070981519119	0.107373678467931
1105	temnothorax	MR	1	16	H31T001R002	0.33322860577635	0.529128120206568	0.177006694367848	0.113519312007482	0.15635882468748	0.120979614762512
1106	temnothorax	MR	1	16	H31T001R003	0.29109055115369	0.507443836406701	0.154838687647203	0.101701820760611	0.157951442069389	0.105759916482973
1107	temnothorax	MR	1	16	H31T001R008	0.166060721772257	0.398161244586143	0.152059060313996	0.0634378247777454	0.182177093337003	0.0630691138002732
1108	temnothorax	MR	1	16	H31T001R015	0.29087917348357	0.47835173477919	0.152250282309025	0.103709127882841	0.157616102746872	0.108348106680858
1109	temnothorax	MR	1	16	H31T001R017	0.290564912931185	0.485083847294058	0.161387356161189	0.100733426058645	0.157969519963617	0.106083603339225
1110	temnothorax	MR	1	16	H14T001R002	0.322500187437198	0.6125363688497	0.187984861546438	0.106903626160374	0.151228237086976	0.116368185417871
1111	temnothorax	MR	1	16	H14T001R005	0.308490273103023	0.527077486331571	0.172875936304838	0.108232285923468	0.159471590337245	0.111360766644573
1112	temnothorax	MR	1	16	H14T001R017	0.369685950600975	0.622513621956961	0.172208419343687	0.116930464768984	0.149772575598916	0.128873959816241
1113	temnothorax	MR	1	16	H14T001R024	0.19802040251735	0.46555207187846	0.163866089081313	0.0754492944723745	0.171725625371398	0.0747647655006064
1114	temnothorax	MR	1	16	H1T001R005	0.347605638095382	0.560987531903504	0.169926852564432	0.117826425934515	0.153524210221055	0.123041656036617
1115	temnothorax	MR	1	16	H1T001R007	0.253177977844602	0.423768100707528	0.143474703365062	0.0927793364004526	0.162509008693313	0.0948958315575046
1116	temnothorax	MR	1	16	H1T001R010	0.311775708735594	0.508017220218269	0.169424121024558	0.106994816216501	0.160377758519721	0.111067863064113
1117	temnothorax	MR	1	16	H1T001R012	0.247538839566822	0.445095304950502	0.142451520754236	0.0924780459098001	0.16545957819408	0.0925261732429278
1118	temnothorax	MR	1	16	H36T001R005	0.323987098920724	0.514115450143155	0.161339665784587	0.10768069665724	0.15765592688441	0.113139869481192
1119	temnothorax	MR	1	16	H36T001R011	0.342502581257399	0.561155417358809	0.171119176317876	0.115061086008755	0.154704406726686	0.121965806862354
1120	temnothorax	MR	1	16	H36T001R013	0.233773553545718	0.403642409854728	0.12928736891131	0.0842105185365079	0.164918480182548	0.0856073140173544
1121	temnothorax	MR	1	17	H16T001R002	0.178788255748584	0.292831038060505	0.108847001510253	0.0736077756855084	0.143549555912479	0.0741732502269605
1122	temnothorax	MR	1	17	H16T001R003	0.204418916389176	0.332851081037222	0.115926739648338	0.0804977064612146	0.141688512500048	0.0834634173078206
1123	temnothorax	MR	1	17	H9T001R003	0.156677040324979	0.302851404273815	0.134553390321346	0.0660456358345516	0.154841836624219	0.0655571036932662
1124	temnothorax	MR	1	17	H31T001R001	0.191004676250735	0.368542886436631	0.146597406619521	0.077027462896463	0.145737266987904	0.0809364411626971
1125	temnothorax	MR	1	17	H31T001R002	0.213477266906561	0.378481646204226	0.154010521829632	0.0838575027559702	0.14278187950313	0.0900625248995957
1126	temnothorax	MR	1	17	H31T001R003	0.184024210838118	0.378471139310454	0.141951091549355	0.0759648887231182	0.14427175465993	0.0779151305074231
1127	temnothorax	MR	1	17	H31T001R008	0.0985114213158909	0.286326440634794	0.13076221117474	0.0429842597252788	0.161895661843256	0.042377796614171
1128	temnothorax	MR	1	17	H31T001R015	0.178885876832298	0.348345205873836	0.134804952969728	0.0744785404161222	0.143588432659694	0.077283212101096
1129	temnothorax	MR	1	17	H31T001R017	0.1855375229312	0.350313837114638	0.143030532470913	0.0775064564039232	0.139568096797189	0.0797407704693677
1130	temnothorax	MR	1	17	H14T001R002	0.210803558818302	0.465630893765412	0.179060477744601	0.0831849465304089	0.14260026891664	0.0896313637245114
1131	temnothorax	MR	1	17	H14T001R005	0.198936714598325	0.391021792277368	0.154659111047927	0.0811291790196063	0.142732960630363	0.0853849248499176
1132	temnothorax	MR	1	17	H14T001R017	0.242484105895002	0.478960375756191	0.171838786901043	0.0924788448110789	0.13807458932199	0.100869069776603
1133	temnothorax	MR	1	17	H14T001R024	0.120722596259176	0.337118438632817	0.143472639512738	0.0521772464276427	0.14938839412774	0.0524862043142977
1134	temnothorax	MR	1	17	H1T001R005	0.22712057425662	0.427570788407252	0.161220368811342	0.0916079282287777	0.142839370676005	0.0950453362134348
1135	temnothorax	MR	1	17	H1T001R007	0.158219967189642	0.305039819247641	0.123094629435263	0.0672313656712188	0.146407561439255	0.068681051845887
1136	temnothorax	MR	1	17	H1T001R010	0.203631907889847	0.373018738200505	0.152254709180083	0.0827920813173038	0.147615597321001	0.0856520780096955
1137	temnothorax	MR	1	17	H1T001R012	0.153367513310892	0.323333460184882	0.127230528349395	0.0656590893222292	0.141930642589989	0.0673972224450527
1138	temnothorax	MR	1	17	H36T001R005	0.216127320254311	0.379456942791421	0.146453192294197	0.0855920780807964	0.145055674965047	0.0893926478039234
1139	temnothorax	MR	1	17	H36T001R011	0.221979101180303	0.419125628103829	0.1609054431916	0.0914957446962892	0.142900095504998	0.0942698529794087
1140	temnothorax	MR	1	17	H36T001R013	0.146560494068446	0.29048145951446	0.114392522255832	0.0620890315651123	0.149448626274965	0.0624648037602379
1141	temnothorax	MR	1	18	H16T001R002	0.104634734424647	0.200562858408429	0.0877027382870361	0.047125974966397	0.116342487502759	0.0485618752671471
1142	temnothorax	MR	1	18	H16T001R003	0.121611064197201	0.231591527292503	0.0951477084600969	0.0545263273315445	0.109825826153232	0.0555957193590229
1143	temnothorax	MR	1	18	H9T001R003	0.0921197170042218	0.19723075231717	0.0990849733159869	0.0436350273596047	0.118854636424363	0.0431283674238187
1144	temnothorax	MR	1	18	H31T001R001	0.111983575841676	0.244170112454177	0.113122120245049	0.0492592378459629	0.113185526517525	0.0529323014386666
1145	temnothorax	MR	1	18	H31T001R002	0.123657143380813	0.248882189116027	0.116497842167555	0.0554423772894727	0.114604345405473	0.0584538267856828
1146	temnothorax	MR	1	18	H31T001R003	0.104855293577954	0.26277069409665	0.116574211596846	0.0485044823478794	0.108003018358138	0.0494859044346588
1147	temnothorax	MR	1	18	H31T001R008	0.053334444301966	0.184391583096645	0.0943953697026154	0.0256692665635259	0.125100130098789	0.0254562611358646
1148	temnothorax	MR	1	18	H31T001R015	0.102541332174947	0.230874844932634	0.104080324412618	0.048111122558509	0.112590758236379	0.04994163310428
1149	temnothorax	MR	1	18	H31T001R017	0.104166349818314	0.231102391210228	0.10979236499905	0.047478198370544	0.110095378821893	0.0492380916292511
1150	temnothorax	MR	1	18	H14T001R002	0.12435375296413	0.320087578559077	0.144853323584737	0.0558412242644115	0.110139855366711	0.0591138905828793
1151	temnothorax	MR	1	18	H14T001R005	0.116243139901783	0.262869407271317	0.121506189408691	0.0543099190746862	0.118444301596721	0.0553566563104965
1152	temnothorax	MR	1	18	H14T001R017	0.142723193823679	0.335701593481322	0.144794461649005	0.0614120392127548	0.113104907738182	0.0664543994046887
1153	temnothorax	MR	1	18	H14T001R024	0.0664056772528109	0.222002570590061	0.106750255506564	0.0314593227062873	0.119390572735459	0.0315780743671147
1154	temnothorax	MR	1	18	H1T001R005	0.135771959236271	0.293864391079494	0.130735767416423	0.0610753807596522	0.107296716667181	0.0640224421227755
1155	temnothorax	MR	1	18	H1T001R007	0.0861316954986565	0.200920209424221	0.0937687579391612	0.0408301266836299	0.115142465716053	0.0415447659856506
1156	temnothorax	MR	1	18	H1T001R010	0.117849526864718	0.246122478238663	0.115935817634352	0.0542742252786011	0.114275181258212	0.0558138663965677
1157	temnothorax	MR	1	18	H1T001R012	0.0849605477372622	0.215040416541051	0.097308227385356	0.0407909623179236	0.115669791161448	0.0411591167464144
1158	temnothorax	MR	1	18	H36T001R005	0.125659855460611	0.255849594991005	0.113940554783158	0.056448417427491	0.113103828536825	0.0584611037245774
1159	temnothorax	MR	1	18	H36T001R011	0.130870444553956	0.285140779172807	0.129957381064733	0.0610906902950815	0.110471238415238	0.0624470001182023
1160	temnothorax	MR	1	18	H36T001R013	0.0840586382689128	0.193568010251122	0.0871032008269251	0.0395457812894467	0.118112014896179	0.0399886073246438
1161	temnothorax	MR	1	19	H16T001R002	0.0577898897947605	0.125829634491633	0.061475485869487	0.0286123990273832	0.0797848028525559	0.0291133341838878
1162	temnothorax	MR	1	19	H16T001R003	0.0676708684425422	0.146405463208921	0.0673097701411905	0.0334562136959469	0.0723652108961997	0.0337526054130318
1163	temnothorax	MR	1	19	H9T001R003	0.0497071491369776	0.116059894411406	0.0628221089144512	0.0254461682762613	0.0779458663616008	0.0252259425467361
1164	temnothorax	MR	1	19	H31T001R001	0.0595364172639233	0.149149454156545	0.0769286923430899	0.0282172417403624	0.0800794083015837	0.0303500032890248
1165	temnothorax	MR	1	19	H31T001R002	0.0667518958975058	0.148210737227633	0.0764587102893733	0.0324901915465805	0.0737641074447072	0.033776221100283
1166	temnothorax	MR	1	19	H31T001R003	0.0567922353119799	0.165439304664737	0.0814568448139076	0.0276397218228433	0.0759274500609161	0.0288602916605789
1167	temnothorax	MR	1	19	H31T001R008	0.0275780128790181	0.110403696105534	0.0612418645380432	0.0149007149030462	0.0838684507694688	0.0139591971128914
1168	temnothorax	MR	1	19	H31T001R015	0.0529280309195417	0.139590806614332	0.0708033144829226	0.0274275540289947	0.0727086076429232	0.0276720136769528
1169	temnothorax	MR	1	19	H31T001R017	0.0553648881728787	0.135419383437103	0.0694192586090271	0.0268951256469249	0.0776689469342301	0.0282553946763166
1170	temnothorax	MR	1	19	H14T001R002	0.0676543001916881	0.196790000007977	0.0994413957926038	0.0331003293636248	0.0723197450504938	0.0344774633900282
1171	temnothorax	MR	1	19	H14T001R005	0.0610425549231254	0.161871878552886	0.0816891419284041	0.0307115373969517	0.077926420481771	0.0313735998456522
1172	temnothorax	MR	1	19	H14T001R017	0.0798315536817794	0.211570153844949	0.102858958834105	0.0377624214052691	0.0740846152922214	0.0401003803537128
1173	temnothorax	MR	1	19	H14T001R024	0.0339416229411932	0.132929617740241	0.0712851655988776	0.016808709457713	0.082906598175104	0.0169763085892982
1174	temnothorax	MR	1	19	H1T001R005	0.0736544870154835	0.184303621225269	0.092273466940925	0.0365940691955976	0.074847720914203	0.0370391158737633
1175	temnothorax	MR	1	19	H1T001R007	0.0444789929918733	0.124282593917803	0.0644275544770904	0.0228316485221935	0.0754991173123971	0.0229479063822035
1176	temnothorax	MR	1	19	H1T001R010	0.0648253328663979	0.150619216557527	0.0777319551673847	0.0314322871773499	0.0795097798401873	0.0327521449589917
1177	temnothorax	MR	1	19	H1T001R012	0.0431393948653402	0.131868349410731	0.0681229603849077	0.0222760673511418	0.0827258100275527	0.0221813545124743
1178	temnothorax	MR	1	19	H36T001R005	0.0698237366717669	0.154335986905399	0.0769991209108521	0.0348536267414304	0.0797118118773533	0.0349830886880578
1179	temnothorax	MR	1	19	H36T001R011	0.0706543243930129	0.176629813694795	0.0905577867505973	0.0349501002219451	0.0795222150043928	0.0358092428760654
1180	temnothorax	MR	1	19	H36T001R013	0.0454418932250848	0.119371258841316	0.0605833516443359	0.0222718147053173	0.0803505811792082	0.0233080248682755
1181	temnothorax	MR	1	20	H16T001R002	0.0287810402375142	0.0733508016672151	0.0391290392137565	0.0144845850958201	0.0461693428495564	0.0151767605187633
1182	temnothorax	MR	1	20	H16T001R003	0.0362262760802833	0.0863779232417479	0.0435263122146006	0.0192833445816376	0.0454589182621095	0.0186864926012284
1183	temnothorax	MR	1	20	H9T001R003	0.0248251749717947	0.063957186907724	0.0365125018607271	0.0132156345085644	0.0497860261023113	0.0129961716246215
1184	temnothorax	MR	1	20	H31T001R001	0.0297625584671856	0.0800343282348838	0.0442797299656728	0.0149332463586926	0.0466384123285969	0.0155426172250816
1185	temnothorax	MR	1	20	H31T001R002	0.0334522497234745	0.0844718626281044	0.0465814562496151	0.0167477156782187	0.0480044261928812	0.0176370482624903
1186	temnothorax	MR	1	20	H31T001R003	0.0290755119878183	0.0937861913646066	0.0503182504084689	0.013986469257085	0.0441927024753072	0.0154264820860867
1187	temnothorax	MR	1	20	H31T001R008	0.0133994121176226	0.0619049536834612	0.0371001411801526	0.0074304619853134	0.0513101422704389	0.00688783900626282
1188	temnothorax	MR	1	20	H31T001R015	0.0248666497734016	0.07606757568907	0.0407417990982584	0.0132858443296814	0.0455153457346981	0.0132789125162602
1189	temnothorax	MR	1	20	H31T001R017	0.0272195678666853	0.0770560440797241	0.0428609836474347	0.0137358937904415	0.0487671581163044	0.0141600811885844
1190	temnothorax	MR	1	20	H14T001R002	0.0347716950375805	0.112805022092156	0.0615735922441061	0.0183007561101503	0.046148882853303	0.0183300419425466
1191	temnothorax	MR	1	20	H14T001R005	0.0294773519516449	0.0911914404605667	0.0501084743272343	0.0156044446374628	0.0487848410609759	0.0157424506115626
1192	temnothorax	MR	1	20	H14T001R017	0.0413353394067815	0.124169994102141	0.0647925286468055	0.0200210706877185	0.0437236086131824	0.0213023502626268
1193	temnothorax	MR	1	20	H14T001R024	0.0175532739478343	0.0732234563015382	0.0419735813472971	0.00890995864922141	0.0464636882417327	0.00907156685886005
1194	temnothorax	MR	1	20	H1T001R005	0.0380162477510919	0.105521818581662	0.0567043492555207	0.0187462952208792	0.0457592294131799	0.0198178923463228
1195	temnothorax	MR	1	20	H1T001R007	0.0225462303809528	0.0696734952906774	0.0387211108543821	0.0118832141655918	0.0452480946195231	0.0118501460028405
1196	temnothorax	MR	1	20	H1T001R010	0.0335036510701395	0.0839242723215473	0.0458482930004897	0.0161386919762943	0.0485715460593836	0.0176217624146655
1197	temnothorax	MR	1	20	H1T001R012	0.0209682063739407	0.0740540812135621	0.0408701095004652	0.0108806706603915	0.0474482314042273	0.0111146431266778
1198	temnothorax	MR	1	20	H36T001R005	0.0362138632952247	0.0871306620505412	0.0461171167418962	0.018901408282834	0.0475017937676744	0.0189850963916581
1199	temnothorax	MR	1	20	H36T001R011	0.035430479034544	0.100517889215683	0.0548964437507212	0.018211812635278	0.0473237044916426	0.0187680972116144
1200	temnothorax	MR	1	20	H36T001R013	0.0212456999495719	0.0686342819103722	0.0379261170302436	0.011198783786505	0.0453697772199016	0.0112755907697838
1201	temnothorax	M	2	1	H16T001R002	0.469327129008437	0.24290737378189	0.000602733576741816	0.000295266879237224	6.15224595283442e-06	9.18194246519508e-06
1202	temnothorax	M	2	1	H16T001R003	0.445940435327394	0.255896608453453	0.00105835651690958	0.000669213271937442	1.38307178126786e-05	-6.2919581046779e-06
1203	temnothorax	M	2	1	H9T001R003	0.674768505644801	0.330394535004866	0.00111988063192876	0.000551952220408227	1.52822304597608e-05	2.09060859322735e-05
1204	temnothorax	M	2	1	H31T001R001	0.542797347217355	0.269335932664749	0.000849516488513185	0.000770789350784509	-1.57960532585886e-06	4.85095062353603e-06
1205	temnothorax	M	2	1	H31T001R002	0.481803558111438	0.236270116998342	0.00124691955197133	0.000259260843729068	-4.66870671726528e-06	1.03823475484324e-05
1206	temnothorax	M	2	1	H31T001R003	0.532072457259093	0.252934901714124	0.000819361170946072	-8.87300686986549e-05	2.16371799898594e-06	2.87473498620115e-06
1207	temnothorax	M	2	1	H31T001R008	0.793901474745761	0.345237813619141	0.000356470592496641	-0.000450677355009496	2.5977160664889e-05	2.27143255678112e-05
1208	temnothorax	M	2	1	H31T001R015	0.499587683045873	0.25770177274697	0.000749283694723888	-5.0281412093799e-05	8.32759704910953e-06	2.14323507163135e-05
1209	temnothorax	M	2	1	H31T001R017	0.516861362201933	0.230516966364524	0.00115288130611159	0.000346905409012482	1.31667123460132e-06	1.78654725612436e-06
1210	temnothorax	M	2	1	H14T001R002	0.507883116732833	0.175461779757874	0.000764501102488719	0.000242334921033377	7.40565200998508e-06	-1.36119451547429e-06
1211	temnothorax	M	2	1	H14T001R005	0.563276717992638	0.245112833021633	-3.09482585226475e-05	6.02103230935849e-05	2.60230351027164e-05	1.08481561842631e-05
1212	temnothorax	M	2	1	H14T001R017	0.404181303071931	0.181992056955597	0.00107543533590299	0.00055798927267464	1.08738559691432e-05	1.86545702372622e-06
1213	temnothorax	M	2	1	H14T001R024	0.684488335137848	0.27276121760932	-2.67624219546857e-05	-0.000740643415999062	3.99525549978746e-05	8.61886892824598e-06
1214	temnothorax	M	2	1	H1T001R005	0.460678374445409	0.199977548695335	0.0012540586153282	0.000284257426624688	5.59073431760644e-06	1.25986803263098e-05
1215	temnothorax	M	2	1	H1T001R007	0.588269486780523	0.332426878257286	-0.000352559754970469	-0.000152933013905259	2.97419590520115e-07	1.19719727278957e-05
1216	temnothorax	M	2	1	H1T001R010	0.548960528449068	0.241515347034051	0.000236343751075735	-0.000256601638568044	1.67384189303654e-05	1.58789447904631e-05
1217	temnothorax	M	2	1	H1T001R012	0.587511496757711	0.317704067894345	0.00219688697654363	0.00055771427656503	2.16744563016615e-06	4.7099070254612e-06
1218	temnothorax	M	2	1	H36T001R005	0.561097936055667	0.251050381231856	0.000209430399292967	0.000135844660182793	-1.09428949116453e-06	-2.58357548819613e-06
1219	temnothorax	M	2	1	H36T001R011	0.464900679300621	0.208463666099209	-3.46582499228941e-05	1.03925462196696e-05	2.44480247994965e-06	-5.68058955792261e-07
1220	temnothorax	M	2	1	H36T001R013	0.603230415744529	0.35521646190218	0.00149336931667901	0.000931098132982551	1.65777671218216e-05	3.47984825591159e-06
1221	temnothorax	M	2	2	H16T001R002	0.452805157848237	0.237099996735905	0.000421344887116835	0.000190960652294708	1.07851164070475e-05	8.25070834596314e-06
1222	temnothorax	M	2	2	H16T001R003	0.431352651707061	0.252439439444412	0.000918642506368886	0.000424998814065446	2.80236750906687e-05	6.01777934964044e-06
1223	temnothorax	M	2	2	H9T001R003	0.648509881420335	0.32611723738645	0.000964817555918611	0.000289028454513895	1.71430564314096e-05	2.04450757548759e-05
1224	temnothorax	M	2	2	H31T001R001	0.524478863117804	0.263365480875658	0.000490907979286357	0.000543463619923634	6.89033718890005e-06	1.61816629955457e-05
1225	temnothorax	M	2	2	H31T001R002	0.461644782641599	0.232544518452356	0.00111208666424071	0.000112715103708363	-4.54296055636504e-06	1.68331390898804e-06
1226	temnothorax	M	2	2	H31T001R003	0.518424911643933	0.250224842604813	0.000816377536566681	-0.000120066456850987	4.27646567097304e-06	1.21998871082116e-05
1227	temnothorax	M	2	2	H31T001R008	0.75816280843342	0.343853154295334	0.000296822482142789	-0.000300126915209755	1.5578381142267e-05	2.1471054878194e-05
1228	temnothorax	M	2	2	H31T001R015	0.489914612570819	0.255721876835353	0.000735606565778471	-7.25196136847489e-05	3.18988246710014e-05	1.07702168646712e-05
1229	temnothorax	M	2	2	H31T001R017	0.50499213285264	0.228888010419594	0.00101240048720914	0.000209245691370016	1.85745618533589e-05	-2.03943146563941e-06
1230	temnothorax	M	2	2	H14T001R002	0.495823819700843	0.170039686533418	0.000633153816948216	0.000127356643114842	1.89617027653644e-06	2.10474915178551e-05
1231	temnothorax	M	2	2	H14T001R005	0.540435174316159	0.239804358405087	-9.90556277401869e-05	2.81774374759486e-05	1.25886900362974e-05	1.3243537169024e-05
1232	temnothorax	M	2	2	H14T001R017	0.394456551065634	0.178904969048338	0.000950983494268545	0.000348604689588912	1.89900821580061e-05	2.38827706966732e-06
1233	temnothorax	M	2	2	H14T001R024	0.664921498574586	0.271436441980418	3.34387142890377e-05	-0.000508861620694763	2.31392760021553e-05	2.54820500217012e-05
1234	temnothorax	M	2	2	H1T001R005	0.441220261012417	0.19785166370661	0.000987399756626101	0.000143071573014839	-1.50714967176969e-06	1.66415183664819e-05
1235	temnothorax	M	2	2	H1T001R007	0.571312667048445	0.32909315883657	-0.000151717696816375	-0.000134404047300668	-8.05752269491207e-06	2.06679978866784e-05
1236	temnothorax	M	2	2	H1T001R010	0.517046318809572	0.238455719694486	0.000316449499129285	-0.000218838042125203	3.92757466340589e-05	6.35043583303481e-06
1237	temnothorax	M	2	2	H1T001R012	0.56893435833859	0.313946361490324	0.0018376365192517	0.000297001488480426	4.64780192621657e-06	1.39270019047648e-05
1238	temnothorax	M	2	2	H36T001R005	0.536667496676302	0.249425522430128	0.0001885837748325	9.94285756861361e-05	-2.10568216938982e-06	-4.46436065480126e-06
1239	temnothorax	M	2	2	H36T001R011	0.452250708672079	0.204656027980701	2.60367840328348e-05	2.74302118832029e-06	8.2881150913263e-06	6.18481780997929e-06
1240	temnothorax	M	2	2	H36T001R013	0.589683624371367	0.351222240867539	0.00124051686262557	0.000616226887978531	7.30448001485693e-06	1.86499753619823e-05
1241	temnothorax	M	2	3	H16T001R002	0.446556280164606	0.234410405002479	0.000481326115450747	0.000143997458656427	2.01989556865173e-05	1.06979350337132e-05
1242	temnothorax	M	2	3	H16T001R003	0.423961606215668	0.25093451036357	0.000803373377662803	0.00024997082496243	2.45724811724812e-05	1.75925955934419e-05
1243	temnothorax	M	2	3	H9T001R003	0.642122815137668	0.324978277327358	0.000959720948337747	0.000156990326584162	1.61438219187895e-05	5.07267087658565e-05
1244	temnothorax	M	2	3	H31T001R001	0.519201852945759	0.261796825510949	0.000365480937260243	0.000432688562924477	1.60845143374026e-05	2.98009155019705e-05
1245	temnothorax	M	2	3	H31T001R002	0.455218156641306	0.230949603250165	0.00109990446846818	0.000113019126990971	1.11759186622798e-05	7.44826809586426e-06
1246	temnothorax	M	2	3	H31T001R003	0.513574390639151	0.248386667925068	0.00077198189172849	-2.49324667619698e-05	1.95259740185749e-05	1.87706832992472e-05
1247	temnothorax	M	2	3	H31T001R008	0.742320285498245	0.342423103094961	0.000429881740288245	-0.000158192749455656	3.44656574220919e-05	4.23842561653858e-05
1248	temnothorax	M	2	3	H31T001R015	0.484636200968429	0.255697132505872	0.000610117402973214	-0.000133075978105828	2.46924070254856e-05	1.5594113607315e-05
1249	temnothorax	M	2	3	H31T001R017	0.501162971371179	0.228658813009534	0.000934881676540118	0.00018400592326183	2.65730837791282e-05	3.74960287202265e-06
1250	temnothorax	M	2	3	H14T001R002	0.488156580474932	0.168030878646658	0.000389504225562867	0.000138985632207658	1.9228282725182e-05	2.28399460692679e-05
1251	temnothorax	M	2	3	H14T001R005	0.528830808156745	0.237229203616047	4.82897145474714e-06	0.000115189236876311	2.9162230977599e-05	1.30632679132868e-05
1252	temnothorax	M	2	3	H14T001R017	0.390105034271018	0.177722750773909	0.000886944317665802	0.000254975593088294	1.76933101701566e-05	1.21206553845764e-05
1253	temnothorax	M	2	3	H14T001R024	0.660723670606909	0.271747327972091	-1.79725749507159e-05	-0.000406958444587603	4.17693949033953e-05	2.43987317873839e-05
1254	temnothorax	M	2	3	H1T001R005	0.433083162845976	0.196069415236453	0.000733501506453435	1.59766506240669e-05	2.69430175285406e-05	2.83904209714258e-05
1255	temnothorax	M	2	3	H1T001R007	0.566293580493525	0.327793918562958	5.65216365924368e-05	-9.90494822969841e-05	-6.41754589320795e-06	3.02147524892323e-05
1256	temnothorax	M	2	3	H1T001R010	0.503290523024378	0.2381755693798	0.000298542944390045	-0.000131304375569693	1.76204252224983e-05	2.23227129455737e-05
1257	temnothorax	M	2	3	H1T001R012	0.56446325718939	0.312278413345361	0.00200771867364636	0.000193627505412584	2.04116880265929e-05	2.28521584888414e-05
1258	temnothorax	M	2	3	H36T001R005	0.524162098998552	0.24891595476823	0.000162642803002425	0.000148923159337857	3.54495224387867e-05	1.20671759674577e-05
1259	temnothorax	M	2	3	H36T001R011	0.448036042877283	0.202931587064184	0.000118920876486872	-5.04813348152116e-06	1.21325867532919e-05	1.98094200287429e-05
1260	temnothorax	M	2	3	H36T001R013	0.585136160232542	0.348712314991543	0.00110112403027994	0.000658258688431934	2.447682884787e-05	2.10927498143009e-05
1261	temnothorax	M	2	4	H16T001R002	0.444127006609157	0.233148762863711	0.000521469306396274	0.000115534905027886	2.50583439162467e-05	1.36938474009409e-05
1262	temnothorax	M	2	4	H16T001R003	0.418650089551966	0.250475954349818	0.000935124858629171	0.000190659033377131	7.38718160594614e-05	3.00374480000243e-05
1263	temnothorax	M	2	4	H9T001R003	0.638217891067361	0.324145486154502	0.000945173556886509	0.000234913467178657	3.17584471610422e-05	0.000105471173556325
1264	temnothorax	M	2	4	H31T001R001	0.517815442917092	0.260827729287543	0.000202204072213672	0.000406339994844432	5.58401789191807e-05	3.60921486968291e-05
1265	temnothorax	M	2	4	H31T001R002	0.452142057503941	0.229817637452468	0.00101289744556468	4.68826724001884e-05	1.39353651736581e-05	3.05605508835789e-05
1266	temnothorax	M	2	4	H31T001R003	0.51147102531043	0.248173885987876	0.000775255988039876	4.22369480969712e-05	3.59482997944211e-05	3.83088990423795e-05
1267	temnothorax	M	2	4	H31T001R008	0.736883814881026	0.341501220130588	0.000415203003103791	-0.000151457354474557	5.39626595015163e-05	7.06932333668204e-05
1268	temnothorax	M	2	4	H31T001R015	0.483214844059014	0.255463695414914	0.000505405024967814	-6.93488829952242e-05	1.95240171345674e-05	4.86239658315108e-05
1269	temnothorax	M	2	4	H31T001R017	0.499648127271555	0.228231910509464	0.000883188037374664	0.000183966807799915	1.73554491568779e-05	4.38611607244027e-05
1270	temnothorax	M	2	4	H14T001R002	0.486322362370302	0.166854353852961	0.000242180564366635	6.19450956805166e-05	5.25817024655187e-05	1.21267532353434e-05
1271	temnothorax	M	2	4	H14T001R005	0.524909452930864	0.235762614951332	8.96782626366676e-05	0.000108123346057281	5.72606861841199e-05	3.30356831031692e-05
1272	temnothorax	M	2	4	H14T001R017	0.388633576219523	0.177525699504637	0.000800952004631127	0.00018660294461063	2.25643972383184e-05	1.24535093926376e-05
1273	temnothorax	M	2	4	H14T001R024	0.658400606472393	0.271923086297929	-0.000100449350133119	-0.000343258402264193	9.2975079840887e-05	8.48959440152538e-05
1274	temnothorax	M	2	4	H1T001R005	0.430089450045946	0.195170594499728	0.000735441064602004	4.42665729852119e-05	5.88251332229214e-05	4.77598874503466e-05
1275	temnothorax	M	2	4	H1T001R007	0.56426968391357	0.326750922779628	-1.27318440336238e-05	-7.72539980040187e-05	3.77352030004145e-05	3.82365169833011e-05
1276	temnothorax	M	2	4	H1T001R010	0.498528652077877	0.238002498200602	0.000301091195391424	-6.92604018710066e-05	6.86698295345698e-05	4.16894142104599e-05
1277	temnothorax	M	2	4	H1T001R012	0.563474415767531	0.31215129000492	0.00201832836345532	0.000213262670847295	6.16439679856851e-05	3.72479670245027e-05
1278	temnothorax	M	2	4	H36T001R005	0.519804730310929	0.248926524667162	0.000266617420857226	0.000135060762968898	4.66488095301122e-05	3.01421877752184e-05
1279	temnothorax	M	2	4	H36T001R011	0.444609465281201	0.202323653565815	0.000110851739244291	-4.34317249002486e-05	3.92676464956416e-05	2.59059523256226e-05
1280	temnothorax	M	2	4	H36T001R013	0.581308752733632	0.348806302062015	0.00123925512412273	0.000462638901433691	4.19481732079619e-05	9.12663563804637e-05
1281	temnothorax	M	2	5	H16T001R002	0.442054925240609	0.232025713092228	0.000482237257608623	0.000284801590045485	7.21826160905816e-05	6.35932432445647e-05
1282	temnothorax	M	2	5	H16T001R003	0.416768534213745	0.250343565598772	0.000919453493674455	0.000252057040167438	9.51613224477049e-05	5.63451717819394e-05
1283	temnothorax	M	2	5	H9T001R003	0.63612691785049	0.323134570111041	0.000737575905894777	0.00058828784976322	0.00013640859075685	0.000149062196078828
1284	temnothorax	M	2	5	H31T001R001	0.516636482153224	0.260193945136241	5.47810356115442e-05	0.000559460766059626	5.5938369291183e-05	9.0120515849064e-05
1285	temnothorax	M	2	5	H31T001R002	0.450363272370263	0.229586173634127	0.00107673708299706	0.000168121555986527	6.4739917775438e-05	4.24858011730199e-05
1286	temnothorax	M	2	5	H31T001R003	0.510671108201988	0.248608110296519	0.000970091498913133	6.19066422799999e-05	0.000107421704563809	6.17074726634782e-05
1287	temnothorax	M	2	5	H31T001R008	0.73411942968852	0.341232288283425	0.000489211055870118	-7.37911777139773e-05	0.000124917701730624	0.00016045102329912
1288	temnothorax	M	2	5	H31T001R015	0.481527949728355	0.255355827311377	0.000518971486233851	0.00011082675195192	4.7421361247259e-05	9.28327838730522e-05
1289	temnothorax	M	2	5	H31T001R017	0.497664263310573	0.22789249119533	0.000817889028882699	8.52400065792713e-05	0.000106420781383537	6.10343420798121e-05
1290	temnothorax	M	2	5	H14T001R002	0.484608017397278	0.166099857148156	0.000240616728279042	-2.7723552813871e-05	4.08196332450041e-05	7.95678884348191e-05
1291	temnothorax	M	2	5	H14T001R005	0.522058739948271	0.234255988268317	0.000230580977378409	8.28248899535651e-05	9.06748724580244e-05	0.000116187251240604
1292	temnothorax	M	2	5	H14T001R017	0.387008894610994	0.177146474404371	0.000741765396078965	0.000220714878876361	6.09422701290655e-05	4.44910295019001e-05
1293	temnothorax	M	2	5	H14T001R024	0.6561858126612	0.271789069238545	-4.47187846423243e-05	-0.000155966108266184	0.000135725765806004	0.000125453910421151
1294	temnothorax	M	2	5	H1T001R005	0.428706327475332	0.19449152943504	0.000697382303549975	0.000225195108684507	8.16827906616463e-05	6.3986253771783e-05
1295	temnothorax	M	2	5	H1T001R007	0.563848152543723	0.325561333270335	-1.00783845899539e-05	0.000103978204440438	8.93267567138719e-05	8.36188717216743e-05
1296	temnothorax	M	2	5	H1T001R010	0.495455988221032	0.238731414854223	0.000322444869467452	-6.72447045549341e-06	0.000137810110459117	9.0193721014577e-05
1297	temnothorax	M	2	5	H1T001R012	0.561467494584002	0.312417776396519	0.00215665693872963	0.000111893235682887	0.000114991430328263	0.000112691957127374
1298	temnothorax	M	2	5	H36T001R005	0.517519787766408	0.248500906598796	6.78401904915725e-05	0.00013651937660706	7.53875538899228e-05	4.63049697690283e-05
1299	temnothorax	M	2	5	H36T001R011	0.442762238878692	0.201659535674394	9.2408644292279e-05	-0.00021820893628999	6.02687185791277e-05	3.57378884369286e-05
1300	temnothorax	M	2	5	H36T001R013	0.578909547767295	0.348201178154865	0.00154548966244602	0.000685562616885621	0.000124358970374305	0.000100135406943254
1301	temnothorax	M	2	6	H16T001R002	0.441608827618908	0.231317432409604	0.000575468540934801	0.000234631198338295	0.000123005550415805	7.87546223815085e-05
1302	temnothorax	M	2	6	H16T001R003	0.41621612906317	0.249579765295137	0.000915370809476357	0.000468588829763548	0.000125644731577697	0.000101769743843853
1303	temnothorax	M	2	6	H9T001R003	0.634208463179665	0.321993050130695	0.000975257815858133	0.00108623577990354	0.000250593161125557	0.000281996591767614
1304	temnothorax	M	2	6	H31T001R001	0.515640242765559	0.259368593449841	0.000257749157178173	0.000515185965096287	0.000159729378570219	0.000166582104397614
1305	temnothorax	M	2	6	H31T001R002	0.450323527625185	0.229187413880257	0.0011041297411091	0.000200497603790784	0.000148277350348171	9.07098752096219e-05
1306	temnothorax	M	2	6	H31T001R003	0.509100793452796	0.248771277506223	0.000973484724681393	-0.000190452705219845	0.000191565884029276	0.000116342776150676
1307	temnothorax	M	2	6	H31T001R008	0.732831141575128	0.340334255959924	0.000482542425965406	0.000375815108438502	0.000304994572599572	0.000274971927091871
1308	temnothorax	M	2	6	H31T001R015	0.48075949084889	0.254720481388146	0.000672701360067805	0.000522061907234648	0.000147075057193722	0.000131931952174008
1309	temnothorax	M	2	6	H31T001R017	0.495495980685054	0.227030744485444	0.00103215705795922	-0.000205666441136388	0.000176635303325099	0.000107850906738003
1310	temnothorax	M	2	6	H14T001R002	0.482968150735197	0.165475648029764	0.000451729663252135	9.28123774846687e-06	0.000143462500477707	0.000164738827594258
1311	temnothorax	M	2	6	H14T001R005	0.519931792543026	0.233416118322998	0.000421503486920681	0.000154814329697913	0.000243994283175346	0.000216712616649769
1312	temnothorax	M	2	6	H14T001R017	0.385721626090077	0.17695381976228	0.000879846065898711	0.000356048611163014	0.000169520903335152	7.65453826108481e-05
1313	temnothorax	M	2	6	H14T001R024	0.652856771418168	0.271722612906956	-8.05707513272877e-05	-0.00021873345312134	0.000266520660563933	0.000297814833232939
1314	temnothorax	M	2	6	H1T001R005	0.427122585969675	0.193696717141457	0.000640353853668986	0.000173894933907366	0.000143076391322883	7.62485628879159e-05
1315	temnothorax	M	2	6	H1T001R007	0.562224899562198	0.325159999888607	1.05044801270892e-05	0.00063880872421006	0.000146838417416383	0.000189091995639678
1316	temnothorax	M	2	6	H1T001R010	0.494486073921448	0.23849489462972	0.000365432061135777	0.000326133697926527	0.00015121158419704	0.00021739698434527
1317	temnothorax	M	2	6	H1T001R012	0.55963215861109	0.311790834640971	0.00219310921910878	0.000200984057953376	0.000206599349239788	0.000198814986164634
1318	temnothorax	M	2	6	H36T001R005	0.516600905152243	0.247741155789871	3.76473863635876e-05	0.000338453216659032	0.000236213870657347	0.000181563638894522
1319	temnothorax	M	2	6	H36T001R011	0.440829993401666	0.201604854581364	7.32338330472963e-06	-0.000124739098184037	0.000145529247916156	0.000120124029094544
1320	temnothorax	M	2	6	H36T001R013	0.577972455276572	0.347748491728601	0.00151922444984002	0.000827166839161684	0.000152616765114667	0.000240065005642113
1321	temnothorax	M	2	7	H16T001R002	0.440379186831465	0.23056362310085	0.000406859388069325	0.000473606492740014	0.000318946310747558	0.000250758457598668
1322	temnothorax	M	2	7	H16T001R003	0.415040161130507	0.249671062062887	0.00106605955974433	0.000158479289542072	0.00024103608565018	0.000222184801210275
1323	temnothorax	M	2	7	H9T001R003	0.632769674410801	0.321958408815132	0.00131621730539639	0.000833602746310572	0.00053128616620483	0.000598734758040399
1324	temnothorax	M	2	7	H31T001R001	0.515373618984606	0.258364047101404	0.000527307814054758	0.000666741243879658	0.000422348788196303	0.000374140745924441
1325	temnothorax	M	2	7	H31T001R002	0.449656103906384	0.22889402568718	0.00126960067692682	0.000549923557816365	0.000315847515845247	0.000216222581378538
1326	temnothorax	M	2	7	H31T001R003	0.508448976073406	0.248444342276794	0.0011353971829649	0.000182662427572408	0.000400755629978908	0.00029344848259848
1327	temnothorax	M	2	7	H31T001R008	0.731089024083465	0.339589917150283	0.000883172906591604	0.00091591894283303	0.000691824005662678	0.000590868961429318
1328	temnothorax	M	2	7	H31T001R015	0.48043137006093	0.254657994865715	0.000908349104512962	0.000558490973130291	0.000333551115874847	0.00027007657798315
1329	temnothorax	M	2	7	H31T001R017	0.495009508087105	0.226499736925173	0.00112435098725684	4.22539802986896e-05	0.000392471268245613	0.000231948187344505
1330	temnothorax	M	2	7	H14T001R002	0.481403800322062	0.164677924730328	0.000850339721877454	0.000338274031093719	0.000341222241914687	0.000352979760414549
1331	temnothorax	M	2	7	H14T001R005	0.518446845486077	0.232304475986098	0.000764934798673172	0.00051921762629531	0.000435381178496359	0.000405213527615739
1332	temnothorax	M	2	7	H14T001R017	0.384862406621234	0.176891627033163	0.000987999375238267	0.000400902006350661	0.000298271162271923	0.000188406004525374
1333	temnothorax	M	2	7	H14T001R024	0.650096761687105	0.271540335478984	0.00014231753965318	6.77545618800745e-05	0.000632763008980613	0.000504575288794555
1334	temnothorax	M	2	7	H1T001R005	0.425789547770098	0.193706175447938	0.00125481730478508	0.000200861498253116	0.000291082059676462	0.000191056253235988
1335	temnothorax	M	2	7	H1T001R007	0.561636595643566	0.324038484271848	0.000221588971091461	0.0011788520244768	0.000368002565872562	0.00038958976335685
1336	temnothorax	M	2	7	H1T001R010	0.493532401028472	0.237976568735975	0.000122218874690586	0.000524294179150426	0.000385494158057273	0.000331754344169096
1337	temnothorax	M	2	7	H1T001R012	0.558872159947016	0.311460332881378	0.00289184898630904	0.000591368500222937	0.000428621618791309	0.000448390855723096
1338	temnothorax	M	2	7	H36T001R005	0.515318480734628	0.247175062042933	0.000146374182903556	0.000481877610668041	0.000452164780566439	0.000415866164965901
1339	temnothorax	M	2	7	H36T001R011	0.439757854892803	0.201739827510249	6.43540149793374e-05	-5.25157736552172e-05	0.000300675136606309	0.000289180991085225
1340	temnothorax	M	2	7	H36T001R013	0.576786034312986	0.347657756712565	0.00227882204528019	0.000880383843293722	0.000401315013278806	0.000384381172757097
1341	temnothorax	M	2	8	H16T001R002	0.439280840146511	0.230262473604319	0.00072806898070544	0.000906465327116862	0.000473572303324935	0.000498937112418116
1342	temnothorax	M	2	8	H16T001R003	0.414738986366473	0.24908329779932	0.0018803558685691	0.000261654963925464	0.000480800552660632	0.000461349600673344
1343	temnothorax	M	2	8	H9T001R003	0.631098375261182	0.320929462256072	0.00152215477243943	0.00230883260150956	0.000970391667967144	0.00148484292067601
1344	temnothorax	M	2	8	H31T001R001	0.514668661715128	0.257635590570688	0.00159453692033023	0.00117567282027392	0.000801051469261209	0.000636494950275675
1345	temnothorax	M	2	8	H31T001R002	0.448813828633537	0.228056136832207	0.00125777395931618	0.000594084339484007	0.000617074055088587	0.000356777021653537
1346	temnothorax	M	2	8	H31T001R003	0.507680807987782	0.248052631336663	0.00149948580646856	0.000968697305322326	0.00072601171904184	0.000609824651417831
1347	temnothorax	M	2	8	H31T001R008	0.729541379854481	0.339010736133671	0.00179734560361979	0.00179157764440798	0.00130569791079774	0.00146427993431632
1348	temnothorax	M	2	8	H31T001R015	0.479793100962768	0.254540545788148	0.001342191908508	0.000708505091138182	0.000544600607695457	0.000462004980499482
1349	temnothorax	M	2	8	H31T001R017	0.494511188991162	0.226320512375873	0.00156507224225881	9.3280592488973e-06	0.000912413158247881	0.000637593966900445
1350	temnothorax	M	2	8	H14T001R002	0.479616836905879	0.163985511526311	0.000905780512827039	0.00128996005667245	0.000708658027453998	0.000732657131946548
1351	temnothorax	M	2	8	H14T001R005	0.516944538535136	0.231268527939922	0.00124529734162023	0.000486046914630556	0.000817723131526098	0.00104739763672924
1352	temnothorax	M	2	8	H14T001R017	0.384178180869493	0.176384447614986	0.00077563339509274	0.000805905849321962	0.000607695116506951	0.000300183726677953
1353	temnothorax	M	2	8	H14T001R024	0.647447728265339	0.271677141130381	0.000180748482429842	0.000428658509378214	0.00118695213570529	0.00111394935153899
1354	temnothorax	M	2	8	H1T001R005	0.424722917142777	0.192907719477835	0.0016288828022466	0.000636306948333787	0.000527326222047419	0.000452781326926491
1355	temnothorax	M	2	8	H1T001R007	0.561473302818156	0.323935069975445	0.000812434213667914	0.00152166936749679	0.000776039365485049	0.000700210507738421
1356	temnothorax	M	2	8	H1T001R010	0.492654125760041	0.237875329640115	0.000302066232509841	0.00109453839157583	0.000818173722539826	0.000799474107766915
1357	temnothorax	M	2	8	H1T001R012	0.55816134460513	0.310546029149179	0.00334169486154409	0.00139933682411635	0.000730187148415656	0.000818252103083748
1358	temnothorax	M	2	8	H36T001R005	0.514476636872123	0.246524200523146	0.000530373288418458	0.00132609704091758	0.000794352018654609	0.000881925458345228
1359	temnothorax	M	2	8	H36T001R011	0.439510277017992	0.201060591470872	0.000300691107565902	0.000374078815839902	0.000625316752300372	0.000589414630683101
1360	temnothorax	M	2	8	H36T001R013	0.575224497815581	0.346631517435779	0.0033324455088791	0.00130315527287283	0.00088896413793427	0.000895854659887677
1361	temnothorax	M	2	9	H16T001R002	0.439232990973485	0.228712907246811	0.00171432068694569	0.00174824547894303	0.000815604459497892	0.00111217910844643
1362	temnothorax	M	2	9	H16T001R003	0.414484323258024	0.2481974843697	0.00233942856241503	0.00121633801122578	0.000794723618197905	0.00108004821653476
1363	temnothorax	M	2	9	H9T001R003	0.629774455240364	0.318781803488791	0.00283535055337118	0.00444442412407197	0.00145802629673776	0.00281947696591452
1364	temnothorax	M	2	9	H31T001R001	0.513265501989268	0.255916064248821	0.00225374286254786	0.00169874210768482	0.00113636976529499	0.00129216921802801
1365	temnothorax	M	2	9	H31T001R002	0.448321527792251	0.227585714730057	0.00115678327269221	0.0011065734646792	0.00103586722699076	0.000889646599984965
1366	temnothorax	M	2	9	H31T001R003	0.506529267484108	0.247094311270109	0.00187519734716808	0.00189579420431704	0.00118524221306406	0.00125938278457721
1367	temnothorax	M	2	9	H31T001R008	0.727054411092277	0.337786073059023	0.00311772947281598	0.0024738220089943	0.00195588943110863	0.00291529253846423
1368	temnothorax	M	2	9	H31T001R015	0.478650159235096	0.254059351509932	0.00159879715829737	0.000715226498253168	0.00102769306733137	0.000925212601332825
1369	temnothorax	M	2	9	H31T001R017	0.493674361962948	0.226046766324355	0.00227436592869023	0.000860390804711292	0.00131543120271808	0.00122826911792873
1370	temnothorax	M	2	9	H14T001R002	0.478230927813697	0.16231794482823	0.00159599420422374	0.00148059118568234	0.00101362532221664	0.00166289413603891
1371	temnothorax	M	2	9	H14T001R005	0.515522074763468	0.229179646077078	0.00238347103207927	0.00158771259016361	0.00121577230737482	0.00195031059331523
1372	temnothorax	M	2	9	H14T001R017	0.382989219007423	0.176236565390189	0.00109592652047434	0.00112157070672542	0.000733687903671667	0.000637595740294072
1373	temnothorax	M	2	9	H14T001R024	0.645172729900693	0.271404592078362	0.000514569911836364	0.00130903855773256	0.00155541350696789	0.00258868609741147
1374	temnothorax	M	2	9	H1T001R005	0.423586910882392	0.192241349305394	0.00170804496190437	0.0010437155725417	0.00103370134382246	0.00115988574714572
1375	temnothorax	M	2	9	H1T001R007	0.560491223266678	0.322734980937715	0.00179205087967273	0.0024264947121548	0.00119529334316683	0.00169028959844658
1376	temnothorax	M	2	9	H1T001R010	0.491872460437454	0.237994302698337	0.00103167555119507	0.00196752404565925	0.00109739533735125	0.0016308215240835
1377	temnothorax	M	2	9	H1T001R012	0.556753239868071	0.309156596773124	0.00413836411466208	0.00330456637684706	0.0012834596054647	0.00162250212526653
1378	temnothorax	M	2	9	H36T001R005	0.513794748861099	0.245153843056006	0.000757499346305161	0.00192469582668423	0.00122105749971007	0.00207385209794282
1379	temnothorax	M	2	9	H36T001R011	0.438238145841261	0.200547021961323	0.00076763314865887	0.000793085853412404	0.000959414022848002	0.00141754085587329
1380	temnothorax	M	2	9	H36T001R013	0.573683025072675	0.34463257320228	0.00405212559918187	0.00331623209190813	0.00112179094482751	0.00196713535902262
1381	temnothorax	M	2	10	H16T001R002	0.438782685554427	0.226183186083406	0.00210248990030327	0.00277622234517722	0.00126193180396296	0.00212287309282308
1382	temnothorax	M	2	10	H16T001R003	0.412649715368002	0.247394574975526	0.00272801178156808	0.0030800005751129	0.0011184712851261	0.0019237159040644
1383	temnothorax	M	2	10	H9T001R003	0.626445595032332	0.314992903735852	0.00423742141192774	0.00684742373700117	0.00180135915693492	0.00424699548942886
1384	temnothorax	M	2	10	H31T001R001	0.511235963294034	0.253781229613816	0.00319413534259687	0.00314202917054608	0.0014450742711943	0.00205166621899124
1385	temnothorax	M	2	10	H31T001R002	0.447258104712403	0.22701753478354	0.0018560543518783	0.0015358930076489	0.00152595775902678	0.00129511842141614
1386	temnothorax	M	2	10	H31T001R003	0.505339657919653	0.24615740120912	0.00209400903663684	0.00324660314398926	0.00156292056483471	0.00241265591819451
1387	temnothorax	M	2	10	H31T001R008	0.722946124667905	0.335708244523158	0.00442526272034603	0.00545809489855727	0.00226035070373541	0.00508250652360567
1388	temnothorax	M	2	10	H31T001R015	0.477409179453849	0.252907231709081	0.00194266931051277	0.00190408913619881	0.00130411807847643	0.00157159722625596
1389	temnothorax	M	2	10	H31T001R017	0.492340154193198	0.224151145110334	0.00189617777307489	0.00231918957016597	0.0014033101844182	0.00171249847281767
1390	temnothorax	M	2	10	H14T001R002	0.475924882890312	0.160272295617408	0.00203611947075849	0.00283077025390334	0.00118982614537891	0.00303548325045952
1391	temnothorax	M	2	10	H14T001R005	0.512815509211611	0.226059682788307	0.00280791321877392	0.00328962720377563	0.00160084734463648	0.00339681673129731
1392	temnothorax	M	2	10	H14T001R017	0.382401091539444	0.175158994913867	0.00139100745211709	0.00181833193883346	0.00101371788117005	0.00137677372732174
1393	temnothorax	M	2	10	H14T001R024	0.642216071657674	0.271067794374331	0.000648618546860777	0.00291721887851464	0.00220779452237176	0.00448017746215313
1394	temnothorax	M	2	10	H1T001R005	0.422561958466898	0.19087086029246	0.00201131182110922	0.00149978976962995	0.00120591343262872	0.0017992341950813
1395	temnothorax	M	2	10	H1T001R007	0.558947838612329	0.320594763774578	0.00326914905569388	0.00321956987422666	0.00156140352637421	0.00257780431564432
1396	temnothorax	M	2	10	H1T001R010	0.490590011332107	0.237461819230941	0.00107477477978255	0.00293572038290186	0.0016429047286538	0.00296760830126736
1397	temnothorax	M	2	10	H1T001R012	0.555732264266167	0.307608342109491	0.00479280896740736	0.0051898542336281	0.00164556300542408	0.00293984735684459
1398	temnothorax	M	2	10	H36T001R005	0.512078381361344	0.244392769039393	0.00121642348587487	0.00379569075656116	0.00157884897497455	0.00338168671728908
1399	temnothorax	M	2	10	H36T001R011	0.436689039692786	0.199236636413184	0.00113011740665018	0.00144819188433311	0.00115241389684495	0.00209525358125721
1400	temnothorax	M	2	10	H36T001R013	0.572405429304043	0.341375802752441	0.00523942204663795	0.00470603306965346	0.00155169599423211	0.00369706669678474
1401	temnothorax	M	2	11	H16T001R002	0.436863105639309	0.223827972528498	0.00265417672876292	0.00410650647323713	0.00130347747854107	0.00297615304230711
1402	temnothorax	M	2	11	H16T001R003	0.410689105951972	0.245456373912236	0.00345363820521836	0.00378949134010658	0.00136250908190813	0.00280940434906471
1403	temnothorax	M	2	11	H9T001R003	0.620440210075838	0.310490836597903	0.00490966546040488	0.0102267746666044	0.00218792222580036	0.00708036341491745
1404	temnothorax	M	2	11	H31T001R001	0.508792776805076	0.250755666640674	0.00353908799152352	0.00540086032450585	0.00176141156169921	0.00307441845239827
1405	temnothorax	M	2	11	H31T001R002	0.445765634258624	0.226341697744209	0.00290900036643289	0.00201038311275262	0.00159717341395898	0.00198385883633318
1406	temnothorax	M	2	11	H31T001R003	0.503642493616341	0.244771109651918	0.00253871616916487	0.00450190630823844	0.00168331378284369	0.00319324718889916
1407	temnothorax	M	2	11	H31T001R008	0.714652188284009	0.333218457124499	0.00540645164160945	0.0104655793561288	0.00235686072479455	0.00739392152016453
1408	temnothorax	M	2	11	H31T001R015	0.475392691655779	0.251822676269599	0.00182356406745773	0.00272731542241426	0.00151750856111341	0.00231474235040315
1409	temnothorax	M	2	11	H31T001R017	0.490382093665778	0.222717793835918	0.00184244287409403	0.00344208185640166	0.0018392226170191	0.00299800148196342
1410	temnothorax	M	2	11	H14T001R002	0.470987948687051	0.156708440890356	0.00188990647358972	0.00434398996090013	0.00164821636436349	0.00490529164490518
1411	temnothorax	M	2	11	H14T001R005	0.507702796719435	0.222536436420572	0.0029036953637745	0.00512376058430359	0.00204068121883385	0.00515157340756133
1412	temnothorax	M	2	11	H14T001R017	0.38057296955601	0.174263785478166	0.00145118298999187	0.00220641846977434	0.00138571369190034	0.00180125065653714
1413	temnothorax	M	2	11	H14T001R024	0.636211740811357	0.270407222720301	0.000583298303133554	0.00530968281866084	0.00227816930584752	0.00635566126238341
1414	temnothorax	M	2	11	H1T001R005	0.420820114797997	0.189039566458025	0.00221144601463341	0.00251494043815691	0.00141007769851336	0.00271628957599334
1415	temnothorax	M	2	11	H1T001R007	0.556161638905872	0.316223750987861	0.00328043495877839	0.00509001286648392	0.00192281802711812	0.00376236725036497
1416	temnothorax	M	2	11	H1T001R010	0.488034899437152	0.236613061786744	0.00120241280160529	0.00409583099238436	0.00188392695540875	0.00405952418028747
1417	temnothorax	M	2	11	H1T001R012	0.552515228940397	0.303577883856181	0.00432203290086572	0.0072293900945854	0.00179811671755744	0.00382131685891515
1418	temnothorax	M	2	11	H36T001R005	0.507907369100816	0.243511066811632	0.00157148973044828	0.00550915061236909	0.00184095374051892	0.00493733758239864
1419	temnothorax	M	2	11	H36T001R011	0.434360002185002	0.199153335345141	0.00149158420242497	0.00210163295101486	0.00143588382408195	0.00327215403424337
1420	temnothorax	M	2	11	H36T001R013	0.570415364133596	0.336974402255163	0.00599627164153064	0.00792527310880495	0.00200161097228712	0.00506753524981977
1421	temnothorax	M	2	12	H16T001R002	0.430330865461191	0.219655702731321	0.00284759321045322	0.00569490697484489	0.00147337272965013	0.00362643886804572
1422	temnothorax	M	2	12	H16T001R003	0.40464059232283	0.243129751328317	0.00371094891611955	0.00491892987717149	0.00141177740124592	0.00333813478021193
1423	temnothorax	M	2	12	H9T001R003	0.60806224978936	0.305464535722547	0.00551233921111656	0.0132904372462707	0.00226506041879924	0.00872188128556072
1424	temnothorax	M	2	12	H31T001R001	0.503650775947273	0.247235700156673	0.00391852628645045	0.00605056701817713	0.00202793759800546	0.00396931817685204
1425	temnothorax	M	2	12	H31T001R002	0.442842351829373	0.224496053717213	0.00306860681033444	0.0026915443954921	0.00161108315693344	0.00244212706844652
1426	temnothorax	M	2	12	H31T001R003	0.497873898295498	0.242813749853439	0.00272023594239868	0.00502165103584482	0.00200902146553098	0.00434761256827528
1427	temnothorax	M	2	12	H31T001R008	0.701500778974548	0.330512042160987	0.00577026621190217	0.0149894261359792	0.00321511637933229	0.0102823638169665
1428	temnothorax	M	2	12	H31T001R015	0.471133351018635	0.250496441880745	0.002277748741423	0.00430220470280109	0.00150248829944389	0.00268429087210309
1429	temnothorax	M	2	12	H31T001R017	0.484806012858723	0.221053791962489	0.00158214334275525	0.00430914498496266	0.00180817441884329	0.00381853256701573
1430	temnothorax	M	2	12	H14T001R002	0.461819347660857	0.154532141353531	0.00170815416685657	0.0051084689223131	0.0016549601810188	0.00601033883803623
1431	temnothorax	M	2	12	H14T001R005	0.498342754427525	0.219996955133119	0.003357608629624	0.00604647298043313	0.00230920171772585	0.0061607226662667
1432	temnothorax	M	2	12	H14T001R017	0.377138736164525	0.173448067435621	0.00164577922667326	0.00314891191626144	0.00167509139412313	0.0019594711910399
1433	temnothorax	M	2	12	H14T001R024	0.625550163740617	0.269465903834315	0.000783547020182306	0.00671149520835788	0.00291100725445218	0.00919666929092302
1434	temnothorax	M	2	12	H1T001R005	0.41685433487526	0.186755294750766	0.00199691043213654	0.00328996562994708	0.00168721953285088	0.00361753781376684
1435	temnothorax	M	2	12	H1T001R007	0.551406424410055	0.312179923246059	0.00376004374213484	0.00669095757376702	0.00205580637779621	0.00506747439974516
1436	temnothorax	M	2	12	H1T001R010	0.480629082557452	0.235803465174258	0.00114216052644012	0.00505533363934318	0.00180363309166656	0.00487472147683218
1437	temnothorax	M	2	12	H1T001R012	0.544748148784418	0.301175600409118	0.00529999581196748	0.00972795885658935	0.00220297244920835	0.00512484160048754
1438	temnothorax	M	2	12	H36T001R005	0.497368448011655	0.242432307765222	0.00118111942379971	0.00730237111564962	0.00216490721713289	0.00634296237189065
1439	temnothorax	M	2	12	H36T001R011	0.428446825218862	0.197090232475903	0.00140885837950897	0.00278270301117588	0.00167326864807096	0.00404835172083597
1440	temnothorax	M	2	12	H36T001R013	0.563165715731089	0.331470817863957	0.00601168917037829	0.0105840763067461	0.00220178907680489	0.00670133947920643
1441	temnothorax	M	2	13	H16T001R002	0.419386038429753	0.216624406343275	0.00304278678421084	0.005551311731218	0.0019938497599061	0.00454273115538662
1442	temnothorax	M	2	13	H16T001R003	0.395922925666683	0.241180441801095	0.00466007321854823	0.00652045411744309	0.001749709874162	0.00404710083104166
1443	temnothorax	M	2	13	H9T001R003	0.585467293260072	0.301643790065995	0.00572996240102442	0.0149249376794621	0.00258587813449737	0.0094970481462355
1444	temnothorax	M	2	13	H31T001R001	0.497759627036239	0.244158305081341	0.0036201132518369	0.00720280099928689	0.00205739134184699	0.00498558403795977
1445	temnothorax	M	2	13	H31T001R002	0.436976464187686	0.222808986834963	0.00369889650632462	0.00385426678860509	0.00173877865338745	0.00293186027413715
1446	temnothorax	M	2	13	H31T001R003	0.486659744253009	0.241402426170099	0.00307055321654007	0.00589197277062202	0.00208471619628179	0.00478275036570861
1447	temnothorax	M	2	13	H31T001R008	0.676049208157433	0.326749794510429	0.00570023655757462	0.0180971626145281	0.00330077940858694	0.0121654163121403
1448	temnothorax	M	2	13	H31T001R015	0.465980529925064	0.248972087953689	0.00284450219924969	0.0051483684705938	0.00182050652606971	0.00350969421565407
1449	temnothorax	M	2	13	H31T001R017	0.477596112340733	0.220108933040655	0.00232730000682498	0.00578518156698889	0.00221841998731561	0.0045683056391932
1450	temnothorax	M	2	13	H14T001R002	0.446096649615437	0.151554214121636	0.00114172577703053	0.00604709553616238	0.00209379738667584	0.00725136767785218
1451	temnothorax	M	2	13	H14T001R005	0.480589211678147	0.217952489927834	0.00305516610514346	0.00711786527151154	0.0024137115933745	0.00686903023474118
1452	temnothorax	M	2	13	H14T001R017	0.373365640623234	0.17269246170102	0.00173178995334288	0.00371236564768991	0.00166946602350482	0.00293819629306584
1453	temnothorax	M	2	13	H14T001R024	0.603743584316573	0.267537680077299	0.00088315573403932	0.0084926137893595	0.00262854859433772	0.00959309711712123
1454	temnothorax	M	2	13	H1T001R005	0.407323507597779	0.184601455499358	0.00170534747953902	0.00374387675865625	0.00169081955606946	0.0042991864361641
1455	temnothorax	M	2	13	H1T001R007	0.540129679378733	0.308102613239691	0.00336402533772127	0.0078524008458482	0.00207849534742456	0.00561164968385831
1456	temnothorax	M	2	13	H1T001R010	0.468740722768878	0.235294113306451	0.00180959069979529	0.00633223735597859	0.00205970433026905	0.00565434530833642
1457	temnothorax	M	2	13	H1T001R012	0.534012650704765	0.297812127050219	0.00563474487141453	0.011211844550612	0.002106554598371	0.0059039710233867
1458	temnothorax	M	2	13	H36T001R005	0.479532870272942	0.240358643489326	0.00178829009693807	0.00907535447547585	0.00234045425347958	0.00657460572164322
1459	temnothorax	M	2	13	H36T001R011	0.419408935369156	0.19508332881929	0.00124326373313258	0.00425368482014271	0.00184356354728308	0.00485190254929893
1460	temnothorax	M	2	13	H36T001R013	0.546680987834836	0.328005672708446	0.00656284448932648	0.0122915376785015	0.00251225516525458	0.00840693320119781
1461	temnothorax	M	2	14	H16T001R002	0.406918028424979	0.212879855898125	0.00323007976562654	0.00553394093114556	0.00174269242410959	0.00436751224875527
1462	temnothorax	M	2	14	H16T001R003	0.382502805696114	0.238292014450114	0.00518695030256864	0.0059139824198225	0.0018617604866942	0.00399171204429218
1463	temnothorax	M	2	14	H9T001R003	0.554189513107672	0.297576255907415	0.00582016852150148	0.0159275338902638	0.00257896277408471	0.0102649411058054
1464	temnothorax	M	2	14	H31T001R001	0.486912323480176	0.242562203654766	0.00361526166159755	0.00840289578325176	0.00226670425507941	0.00555235193149379
1465	temnothorax	M	2	14	H31T001R002	0.429397299475103	0.22155059929527	0.00394247068071512	0.00428412793363337	0.00185916753311373	0.00306273173136961
1466	temnothorax	M	2	14	H31T001R003	0.47171363730847	0.239177389212309	0.00320346558914697	0.00701934253428239	0.00233082083084505	0.00520469711748945
1467	temnothorax	M	2	14	H31T001R008	0.635430209378977	0.323137034471092	0.00541361771168221	0.0193891365551504	0.00298956139076821	0.0129566066011684
1468	temnothorax	M	2	14	H31T001R015	0.456869972496581	0.247526466700778	0.00281472419602407	0.00671792209474061	0.00186048405405264	0.00406471060067633
1469	temnothorax	M	2	14	H31T001R017	0.466676369547618	0.218436582878628	0.00278370656471409	0.00543046393129899	0.00212889471206331	0.00516186320137895
1470	temnothorax	M	2	14	H14T001R002	0.421685329416622	0.150139579806744	0.000992196528754543	0.00594374428002536	0.00189758784539478	0.00703731624516723
1471	temnothorax	M	2	14	H14T001R005	0.457305029456959	0.214095621811028	0.00354740592633301	0.00768008760059725	0.00256506574894696	0.00705435682925408
1472	temnothorax	M	2	14	H14T001R017	0.368377058141364	0.171566804142129	0.00174393065371049	0.00406722101134315	0.00160039692738829	0.00258095170828027
1473	temnothorax	M	2	14	H14T001R024	0.57056525206826	0.266636099935068	0.00140298514952627	0.00933124693791851	0.00277430532186528	0.0101827246233517
1474	temnothorax	M	2	14	H1T001R005	0.393353338942259	0.183139769687767	0.00144345157632081	0.00363211182780063	0.00191596863431129	0.00425349952385019
1475	temnothorax	M	2	14	H1T001R007	0.523518295986786	0.303387885082819	0.00374455148030985	0.00872211414949435	0.00251662137768145	0.00638963727915489
1476	temnothorax	M	2	14	H1T001R010	0.450779486777746	0.234529128975892	0.00225560870521901	0.00669284502069897	0.00242273547629886	0.00629212329010015
1477	temnothorax	M	2	14	H1T001R012	0.51812822559578	0.295651922527353	0.00601729436110921	0.0113605525550608	0.00220445535368983	0.00683923037661828
1478	temnothorax	M	2	14	H36T001R005	0.458538274673089	0.23772436405718	0.00242313434282602	0.00920345518862375	0.00210841325768345	0.00652641707885978
1479	temnothorax	M	2	14	H36T001R011	0.405812503192874	0.193689846350349	0.00106008477485035	0.00492190716571233	0.00222482722263023	0.00513482684193108
1480	temnothorax	M	2	14	H36T001R013	0.524723712666818	0.322917358912127	0.00719405514961093	0.0148417610608449	0.00206759410544288	0.00827560728087597
1481	temnothorax	M	2	15	H16T001R002	0.392890808382779	0.209694290467322	0.00349397242107816	0.00646155142102856	0.00195608821823281	0.00444854141369411
1482	temnothorax	M	2	15	H16T001R003	0.372645689322087	0.235020538880683	0.00483796535210973	0.00603066446180121	0.00179172248167767	0.00380971481337307
1483	temnothorax	M	2	15	H9T001R003	0.520070029740311	0.293714371728756	0.00621238674729684	0.0147270475879745	0.0026557557760025	0.00942477708732893
1484	temnothorax	M	2	15	H31T001R001	0.472672294626151	0.238617472727296	0.0032183351810569	0.00791863160514471	0.00242818371045888	0.00564095692521361
1485	temnothorax	M	2	15	H31T001R002	0.422420839163026	0.219925150621454	0.00427876784336318	0.00455853848065879	0.00199662902590733	0.00323320253177386
1486	temnothorax	M	2	15	H31T001R003	0.45887393566697	0.237563798135373	0.00372122354423646	0.00635664016979343	0.00210866747861763	0.0048941446186395
1487	temnothorax	M	2	15	H31T001R008	0.586745883738209	0.318779173330782	0.00592981568650052	0.0183230738920196	0.00366974827415117	0.0131413758173481
1488	temnothorax	M	2	15	H31T001R015	0.4474112122297	0.245900671647613	0.00309827657189018	0.00680228705958132	0.00193929509346568	0.00419245960537079
1489	temnothorax	M	2	15	H31T001R017	0.452088851849817	0.216586917826867	0.00305700585042497	0.00496497352763079	0.00233979991662405	0.00485944040831242
1490	temnothorax	M	2	15	H14T001R002	0.393420033270266	0.149206418378538	0.000924297187674055	0.00498276285099743	0.00218554953035477	0.00668152787627169
1491	temnothorax	M	2	15	H14T001R005	0.434443742473644	0.209998389811734	0.00349208417353481	0.00737135480416218	0.00260561147965052	0.00680447254886966
1492	temnothorax	M	2	15	H14T001R017	0.360067488546874	0.170068716712702	0.00161159416520671	0.0045313017221348	0.00164349348230631	0.00284535100592509
1493	temnothorax	M	2	15	H14T001R024	0.535074949151683	0.264968009191131	0.00210840449782886	0.00901522441747799	0.00353840837178794	0.0105844200223405
1494	temnothorax	M	2	15	H1T001R005	0.378491663407017	0.181597835660516	0.00156212815139747	0.00426151604274843	0.00201914711908107	0.00416739518932172
1495	temnothorax	M	2	15	H1T001R007	0.507595892428152	0.299535925804252	0.00347078740817541	0.00863240309191218	0.00241779020767973	0.00650881858356448
1496	temnothorax	M	2	15	H1T001R010	0.432039225767867	0.233538852334028	0.00212291091888541	0.00629522096598472	0.00231714890670905	0.00578076692902496
1497	temnothorax	M	2	15	H1T001R012	0.500885704802245	0.293237085971331	0.00570371581274932	0.0101979581992903	0.00256920476113424	0.00693715726795446
1498	temnothorax	M	2	15	H36T001R005	0.439077145677377	0.235922089811657	0.00257112148947187	0.00888860937028936	0.00246682169111905	0.00674251548690003
1499	temnothorax	M	2	15	H36T001R011	0.388795474099204	0.192147819858808	0.000814366841967704	0.0043434535044039	0.00210948387300503	0.00455199227586163
1500	temnothorax	M	2	15	H36T001R013	0.492657824039504	0.317493540939766	0.0076486810715337	0.0153651474730533	0.00234309972042746	0.00814398756321071
1501	temnothorax	M	2	16	H16T001R002	0.380573005363205	0.206790472188675	0.00402899483127903	0.00587468242934464	0.00221131496625961	0.00411238950676883
1502	temnothorax	M	2	16	H16T001R003	0.362251706380144	0.232133773158097	0.00441755811739477	0.00522247870642413	0.00173006690995773	0.00366377588998631
1503	temnothorax	M	2	16	H9T001R003	0.4863053451356	0.289899379331629	0.00590347248585617	0.0141280976110779	0.00319109649923128	0.00899105991674191
1504	temnothorax	M	2	16	H31T001R001	0.459311584639817	0.236816179134633	0.00348742901254944	0.00763877848320928	0.00240106785926551	0.00567126290719107
1505	temnothorax	M	2	16	H31T001R002	0.416799904614523	0.217190006210347	0.00460008695627089	0.00448250881782729	0.00234236047761215	0.0037288927954869
1506	temnothorax	M	2	16	H31T001R003	0.445509909301842	0.235160584993854	0.00393403419434359	0.00609161051152983	0.00261452825652752	0.00512333904161351
1507	temnothorax	M	2	16	H31T001R008	0.542231954302936	0.315217688993264	0.00604255083737939	0.0167366786807013	0.00386861867388273	0.0126467018115463
1508	temnothorax	M	2	16	H31T001R015	0.436567662311989	0.24452622299517	0.00389613460540583	0.00636545591954162	0.00206658647996123	0.00439399728726002
1509	temnothorax	M	2	16	H31T001R017	0.442120695672673	0.214798008093633	0.00353335652126657	0.00544963891816519	0.00206301115922792	0.00495100814545228
1510	temnothorax	M	2	16	H14T001R002	0.371102528095003	0.148054102649514	0.001144513274276	0.00507690151277284	0.00218858403467624	0.00615723545906962
1511	temnothorax	M	2	16	H14T001R005	0.411967223708314	0.206605720618077	0.00364794271142822	0.00782302834703328	0.00250003836045083	0.00622128947397438
1512	temnothorax	M	2	16	H14T001R017	0.352030549923475	0.168990516766785	0.00172412215553165	0.00413835484421174	0.00181840268890286	0.00296779981923838
1513	temnothorax	M	2	16	H14T001R024	0.501484910385568	0.263922299054882	0.00293913137393199	0.00912726915098244	0.00353159662370907	0.0100353705647921
1514	temnothorax	M	2	16	H1T001R005	0.366904978365273	0.180624941607185	0.001435768598087	0.00401518728413137	0.00218041518776922	0.00398133977178357
1515	temnothorax	M	2	16	H1T001R007	0.49085544962709	0.296914703357755	0.00357080779817591	0.00848314535511904	0.00261282853959208	0.00700500506177551
1516	temnothorax	M	2	16	H1T001R010	0.414504929367541	0.232492221612139	0.00195787322075081	0.00630170615656249	0.00267445823470091	0.00599737346181808
1517	temnothorax	M	2	16	H1T001R012	0.479814945477035	0.290591307443159	0.00604975191934651	0.0101568939896916	0.00220992215986362	0.00649598668985766
1518	temnothorax	M	2	16	H36T001R005	0.417392082670896	0.234371663976855	0.00271895495536396	0.00815334315544689	0.002739933642918	0.00594861343429545
1519	temnothorax	M	2	16	H36T001R011	0.377160601517568	0.191086764862193	0.000938416254076426	0.00425381498049715	0.00210465596603912	0.00432655987956783
1520	temnothorax	M	2	16	H36T001R013	0.466580091922063	0.313204266694897	0.00846262095185472	0.0154504044695218	0.00288549476678585	0.00821161535744567
1521	temnothorax	M	2	17	H16T001R002	0.3696920576825	0.204350009939068	0.00411249268800164	0.00566091667173124	0.00238995059331606	0.0040431557200532
1522	temnothorax	M	2	17	H16T001R003	0.354999208717577	0.229187350773014	0.0049361971305167	0.0052912032348258	0.00209838039884569	0.00380351502276838
1523	temnothorax	M	2	17	H9T001R003	0.455898075025366	0.28556265966882	0.00594388158463633	0.0132642709538618	0.00303333757252006	0.00823155770821221
1524	temnothorax	M	2	17	H31T001R001	0.445248494621579	0.234584948782985	0.00403170637179648	0.00781694625901227	0.00267617274164136	0.00595619249704913
1525	temnothorax	M	2	17	H31T001R002	0.409828689253831	0.215746846197464	0.00468030485319816	0.00543785610757403	0.00233090499450413	0.0036508195185279
1526	temnothorax	M	2	17	H31T001R003	0.434720310529369	0.233165292739068	0.00397019374658837	0.00567744954237329	0.00269253812878289	0.00519023835170501
1527	temnothorax	M	2	17	H31T001R008	0.50056577442041	0.310917806346204	0.00698942519382604	0.0145426283579867	0.00413456170161024	0.0114779914759118
1528	temnothorax	M	2	17	H31T001R015	0.427350318955691	0.24251923215905	0.00412828155133539	0.00598534648875756	0.00224523358411847	0.0044347506633664
1529	temnothorax	M	2	17	H31T001R017	0.430444766970696	0.213356767839945	0.00370387968573924	0.00569028785587841	0.00261683137726159	0.00526453677304845
1530	temnothorax	M	2	17	H14T001R002	0.346756877475627	0.14774399855825	0.00145543213976867	0.00328134436039718	0.00262552267469864	0.00562841044739029
1531	temnothorax	M	2	17	H14T001R005	0.393396193612947	0.203022663799173	0.00345617581367781	0.00633028014639765	0.00279992810490348	0.00561631786486242
1532	temnothorax	M	2	17	H14T001R017	0.346949908887267	0.167786239881289	0.00186328192847611	0.00357853997783347	0.00191612451835389	0.00304742477238017
1533	temnothorax	M	2	17	H14T001R024	0.471737236201925	0.262636185426021	0.00332674573314449	0.00942330347190334	0.00332266537298931	0.00912700472526018
1534	temnothorax	M	2	17	H1T001R005	0.357150830017482	0.17963778087072	0.00159333104553747	0.00402142199256722	0.00237720972997128	0.00414836014719151
1535	temnothorax	M	2	17	H1T001R007	0.472993307107346	0.292742165576848	0.00379472643327941	0.00817923714971584	0.00264441070245183	0.00683707501069993
1536	temnothorax	M	2	17	H1T001R010	0.39865013692561	0.231195961135599	0.00235310548856035	0.00573885669260487	0.00276159691995277	0.00512127092038878
1537	temnothorax	M	2	17	H1T001R012	0.462136115139897	0.287503432003827	0.00687039316856561	0.00982483819983933	0.00290646879504866	0.00712302853798565
1538	temnothorax	M	2	17	H36T001R005	0.396816358198214	0.23172048944269	0.00267435816477066	0.0069820300355777	0.0028575479608743	0.00552270586556391
1539	temnothorax	M	2	17	H36T001R011	0.3659519141668	0.190018868479863	0.00132643635950896	0.0042108342348695	0.00242796543280623	0.00418557938003168
1540	temnothorax	M	2	17	H36T001R013	0.442653281447598	0.308139408469642	0.00949901807719679	0.0141143405455579	0.00307386025245675	0.00752204232191558
1541	temnothorax	M	2	18	H16T001R002	0.359830278331412	0.20241516749239	0.00426237537067293	0.00538569170189733	0.00243071333080231	0.00385475902958861
1542	temnothorax	M	2	18	H16T001R003	0.346689644208492	0.226893493781405	0.00477611726109822	0.00529515374977402	0.0020549453022148	0.00381424448579524
1543	temnothorax	M	2	18	H9T001R003	0.431115759076117	0.283362610621715	0.00627867347509333	0.0131311489747722	0.00392885919281166	0.0083772910720999
1544	temnothorax	M	2	18	H31T001R001	0.433370502435779	0.232391590721262	0.00394845523118548	0.00834903777909165	0.00311916338729389	0.00634386167737582
1545	temnothorax	M	2	18	H31T001R002	0.403053272959832	0.214372031704617	0.0055335205815485	0.00513701498862788	0.00254642718321192	0.00384702632423191
1546	temnothorax	M	2	18	H31T001R003	0.424198659193073	0.230978688667479	0.00396465426824908	0.00549259268414983	0.00328393621218526	0.00578013601938356
1547	temnothorax	M	2	18	H31T001R008	0.465393718979606	0.305677337860923	0.00776934274933382	0.0142805663639089	0.00420473441617656	0.0114813388363018
1548	temnothorax	M	2	18	H31T001R015	0.416511819994457	0.24001504559262	0.00458111629529049	0.00617840401169153	0.00243267629152536	0.00463699502602057
1549	temnothorax	M	2	18	H31T001R017	0.417719331134829	0.211396302127178	0.00366789022211282	0.0056735371399124	0.00277514218414448	0.00593049786233745
1550	temnothorax	M	2	18	H14T001R002	0.330767671058369	0.146542360014324	0.00143408572355685	0.00311740577953273	0.00236210994559021	0.00486399809125421
1551	temnothorax	M	2	18	H14T001R005	0.376186591253485	0.199703557046892	0.00382511324465199	0.00577212138004821	0.00325097753664921	0.00597493117897522
1552	temnothorax	M	2	18	H14T001R017	0.341090584089995	0.166312113262795	0.00152986279378197	0.00377719976656244	0.00198923061368392	0.0031685569789678
1553	temnothorax	M	2	18	H14T001R024	0.445057823819977	0.261365482607457	0.00406813618261829	0.00924728579784579	0.00377820633595531	0.00911358541892389
1554	temnothorax	M	2	18	H1T001R005	0.34606224174848	0.178614897478913	0.00199121716970306	0.00371296545752931	0.00249019949408514	0.00388037398804048
1555	temnothorax	M	2	18	H1T001R007	0.457362794137809	0.289781003475215	0.00379387694591676	0.00852135842756527	0.00300292591618863	0.00694735699320039
1556	temnothorax	M	2	18	H1T001R010	0.385446809334624	0.229688799747043	0.0026226430834807	0.00555267583125731	0.00337906720412851	0.00521746403228078
1557	temnothorax	M	2	18	H1T001R012	0.444125693369116	0.284482037050276	0.00710370664822039	0.00954291573507164	0.00271987462849351	0.00667168563175955
1558	temnothorax	M	2	18	H36T001R005	0.383501526603745	0.230159672974746	0.00314376935811268	0.00708149008191435	0.00305425267003264	0.00521209957293903
1559	temnothorax	M	2	18	H36T001R011	0.354795167754485	0.188670947688631	0.0016748687366685	0.00462589593114267	0.00230711653639629	0.00362748035275081
1560	temnothorax	M	2	18	H36T001R013	0.422274042442385	0.303243653459584	0.00966434744308714	0.013023274732414	0.00317090603948852	0.00733794977536376
1561	temnothorax	M	2	19	H16T001R002	0.352077192263102	0.199290791465389	0.00399884889207984	0.00583327196485518	0.00254559066842944	0.00392645443712945
1562	temnothorax	M	2	19	H16T001R003	0.339463342321931	0.223829994982719	0.00436452810192288	0.00561362420237063	0.0023437336586159	0.00399266166512881
1563	temnothorax	M	2	19	H9T001R003	0.408039971639937	0.279884163193607	0.00663172693567461	0.0124577868959969	0.00381012461956749	0.00786560165579336
1564	temnothorax	M	2	19	H31T001R001	0.421052273533053	0.231345296322307	0.00396144870050082	0.00840609178404679	0.00275213287249627	0.00623257531184405
1565	temnothorax	M	2	19	H31T001R002	0.395731506635347	0.211860519032794	0.00526171482009624	0.00527027353348721	0.00249777077383859	0.0040347596653415
1566	temnothorax	M	2	19	H31T001R003	0.41401036464327	0.228740146656611	0.00460287997874643	0.00612567593013589	0.00315476488062258	0.00588157911762007
1567	temnothorax	M	2	19	H31T001R008	0.435713869428969	0.301180232378448	0.00753961176153903	0.0139237113027496	0.00471352430091529	0.0106990957103934
1568	temnothorax	M	2	19	H31T001R015	0.407606580501557	0.237400648366411	0.00456555257739049	0.00632769161271259	0.00289944084207387	0.00535004032985328
1569	temnothorax	M	2	19	H31T001R017	0.406261711446109	0.210046920837271	0.00379988855133923	0.00511743388490536	0.00286092235895143	0.00576952572024894
1570	temnothorax	M	2	19	H14T001R002	0.315701018890468	0.145142317769799	0.00142321078773698	0.00323670811265657	0.002733372168507	0.00462110838798431
1571	temnothorax	M	2	19	H14T001R005	0.361427142607355	0.196591450605838	0.00376271778585158	0.00492041466311822	0.0036986188601346	0.00550341812184037
1572	temnothorax	M	2	19	H14T001R017	0.336167672661244	0.165760267581755	0.00165669782760557	0.00379137783218726	0.00214501379224887	0.00322197903102745
1573	temnothorax	M	2	19	H14T001R024	0.418282571456842	0.259194567027208	0.00426309751869258	0.00925922367720896	0.00395189927174905	0.00850225606966772
1574	temnothorax	M	2	19	H1T001R005	0.337238727236103	0.177543022280628	0.00206196735706069	0.00368938330042782	0.00275545402486916	0.00376653119063332
1575	temnothorax	M	2	19	H1T001R007	0.443177625123352	0.286594095352537	0.00446543475480982	0.00925060218971805	0.00298212574225495	0.0075383763697684
1576	temnothorax	M	2	19	H1T001R010	0.375206411458096	0.228459240623597	0.00270596241774827	0.00598099730145467	0.00321764370373662	0.00503639620509746
1577	temnothorax	M	2	19	H1T001R012	0.428943506356308	0.280401088720207	0.00743006544111898	0.00979474178160316	0.00321827566221072	0.00713138391120674
1578	temnothorax	M	2	19	H36T001R005	0.371983628300066	0.228491889898973	0.00353779206488163	0.00710722482873363	0.0029259026745416	0.0050071221157991
1579	temnothorax	M	2	19	H36T001R011	0.344759508629521	0.186984440047624	0.00192178462069277	0.00456263424276905	0.0026090140904239	0.00378532834107529
1580	temnothorax	M	2	19	H36T001R013	0.404053967645451	0.297394988341696	0.0101632232752343	0.0118095232840211	0.00302529318732386	0.00692067548926758
1581	temnothorax	M	2	20	H16T001R002	0.344523333810322	0.19568522543235	0.00352450464615587	0.00637467445314184	0.00283940566278146	0.00426358464408433
1582	temnothorax	M	2	20	H16T001R003	0.332111974287949	0.22236810255293	0.00447761125045996	0.0056779238228188	0.00249120176444542	0.00374426935247561
1583	temnothorax	M	2	20	H9T001R003	0.388497775720795	0.275435784487256	0.00713497328210006	0.0128151403944218	0.00389067623803111	0.00800039631400948
1584	temnothorax	M	2	20	H31T001R001	0.410266367348591	0.229683029719851	0.00404302261962981	0.00894011168731507	0.00324702707352273	0.0067503555385727
1585	temnothorax	M	2	20	H31T001R002	0.387438267091372	0.208521068284061	0.00570661947720825	0.00540586252874642	0.00305938049515188	0.00440407828497164
1586	temnothorax	M	2	20	H31T001R003	0.404365368635293	0.226518463942272	0.00431326134555781	0.00623743040977181	0.00316497414608282	0.00584309345675601
1587	temnothorax	M	2	20	H31T001R008	0.409334738366136	0.296334500982371	0.00740429595553448	0.0135733614705892	0.00519821004400972	0.011024965954516
1588	temnothorax	M	2	20	H31T001R015	0.398061682527928	0.235162676244591	0.00438436815271604	0.00720075338798009	0.00278034576123468	0.00519838038249525
1589	temnothorax	M	2	20	H31T001R017	0.395028991129384	0.208693812136126	0.00411890604082179	0.00549276336681118	0.00329576802905633	0.00628501973777539
1590	temnothorax	M	2	20	H14T001R002	0.300190745194523	0.144093953381038	0.00163764912222388	0.00309129004465916	0.00331626989098016	0.00432126372805583
1591	temnothorax	M	2	20	H14T001R005	0.347057875254994	0.193702478313068	0.00366166742694143	0.00470520108127041	0.00371845534173344	0.00506763801948651
1592	temnothorax	M	2	20	H14T001R017	0.331270929718425	0.165159683223983	0.00174305569512179	0.00340396233531445	0.00207442905500339	0.00325965186988919
1593	temnothorax	M	2	20	H14T001R024	0.396344760829191	0.257905659646454	0.00415026551165667	0.00839688735941133	0.00402330424420583	0.00802169072365287
1594	temnothorax	M	2	20	H1T001R005	0.328726189382278	0.176338462343758	0.00203303026411173	0.00333341219993704	0.00289455450295629	0.00364148999195054
1595	temnothorax	M	2	20	H1T001R007	0.426786904840073	0.282897793823188	0.00532582439350505	0.00935913544884631	0.0030638451230235	0.00774528259165543
1596	temnothorax	M	2	20	H1T001R010	0.365287979402409	0.226484130767161	0.00253217446738207	0.00614935670014785	0.00357150238437818	0.00514147986601859
1597	temnothorax	M	2	20	H1T001R012	0.414291912467574	0.275696965809518	0.00716982916248521	0.00947920742453735	0.00328225692455695	0.00702503106129945
1598	temnothorax	M	2	20	H36T001R005	0.359254920202134	0.22587683304895	0.00377259085180329	0.00757409554313144	0.00346457532197249	0.00520815706546736
1599	temnothorax	M	2	20	H36T001R011	0.336214319486026	0.186450623715693	0.00215853010152544	0.00471021927215492	0.00274829796403877	0.00385278753045749
1600	temnothorax	M	2	20	H36T001R013	0.387496654513976	0.290482769485506	0.0107567083450385	0.012030072766888	0.00314021824610382	0.00642538880450777
1601	temnothorax	R	2	1	H16T001R002	0.987385716011749	0.992708314836601	-9.61477648632872e-06	8.24403266771782e-05	9.12614471115757e-08	2.89545919178697e-06
1602	temnothorax	R	2	1	H16T001R003	0.987767837320213	0.994008475748069	5.15171714965334e-05	0.000243963407985393	5.231650815639e-06	1.28592100150525e-05
1603	temnothorax	R	2	1	H9T001R003	0.995632323394621	0.999496271891985	2.89713246107726e-05	0.000337911540026447	6.71085177326834e-06	4.95010340689802e-06
1604	temnothorax	R	2	1	H31T001R001	0.99502486212585	0.996261318681939	-3.37395685722896e-06	0.000256277224714211	1.02303012982174e-05	9.81801289755435e-06
1605	temnothorax	R	2	1	H31T001R002	0.991461999490489	0.999412173613456	-4.41789629644531e-06	0.000143703554992846	4.72277269933118e-06	5.70241002315153e-06
1606	temnothorax	R	2	1	H31T001R003	0.994063716214788	0.99505173867832	-1.03539040276072e-05	0.00033250248861182	-2.23578594872496e-06	7.58466645933179e-07
1607	temnothorax	R	2	1	H31T001R008	1.0008604083309	0.994866484691842	-1.79570959565658e-05	-1.99146324152064e-05	8.22349203843895e-06	-1.74711034282738e-06
1608	temnothorax	R	2	1	H31T001R015	0.991470801823782	0.994758805923304	3.00334031932802e-05	0.000401472279642535	2.73065722276548e-06	7.93056556825148e-06
1609	temnothorax	R	2	1	H31T001R017	0.987921990792867	0.997730216433701	-3.28992053367158e-05	0.00068549117414989	7.95178135727801e-06	6.14530424891999e-06
1610	temnothorax	R	2	1	H14T001R002	0.99123817360158	1.00658987710262	-5.33802551141723e-05	7.34553385127724e-05	1.52820003305391e-05	4.8933201625102e-06
1611	temnothorax	R	2	1	H14T001R005	0.999801343416029	0.99967631952297	-9.74848244196848e-06	5.43249520048006e-05	1.28461056359719e-06	2.29885819334599e-06
1612	temnothorax	R	2	1	H14T001R017	0.991732002149813	1.00235896374824	2.01501411635904e-05	0.000244569071164991	5.67927888520419e-06	-3.79427433656118e-07
1613	temnothorax	R	2	1	H14T001R024	0.995992483238698	0.995333394396041	9.9166504137698e-06	-1.6072721091257e-05	7.21756204824217e-06	4.70888577919423e-06
1614	temnothorax	R	2	1	H1T001R005	0.995490071870295	0.999815589775928	-2.17824689108192e-05	0.000188279923693471	4.83801625172912e-07	8.40332625050355e-06
1615	temnothorax	R	2	1	H1T001R007	0.996328994733826	0.996451794726958	1.74574318482816e-06	-0.000249615498887372	1.18676100727203e-06	2.51344114771607e-06
1616	temnothorax	R	2	1	H1T001R010	0.995694364767249	1.00108814108839	1.13612542930401e-05	0.000168599927986664	1.32196671468071e-05	-9.13919365008797e-07
1617	temnothorax	R	2	1	H1T001R012	0.996768948658005	0.993782932863052	7.41349336639573e-06	-0.000170083964714871	3.9090020506642e-06	1.58063816386644e-05
1618	temnothorax	R	2	1	H36T001R005	0.996900773112263	0.996984489404095	-4.67001385639412e-05	0.000238256379554521	-7.73538789186341e-07	6.77420231789648e-06
1619	temnothorax	R	2	1	H36T001R011	0.992629840181031	0.999891888720043	1.95815864050173e-05	8.13417966451097e-05	3.16621259345983e-06	9.18284479782582e-06
1620	temnothorax	R	2	1	H36T001R013	0.990186350248646	0.991704973983245	7.00976031383023e-05	0.000118440376581506	1.15466182170613e-05	1.24248394058342e-05
1621	temnothorax	R	2	2	H16T001R002	0.987437845319931	0.992485993343452	-3.87819119955552e-06	8.66360040517029e-05	6.40286852771839e-06	9.40032537844176e-06
1622	temnothorax	R	2	2	H16T001R003	0.987596415539249	0.993356309077325	4.47541780644465e-05	0.000232138728576613	1.1233398973566e-05	2.10191303134319e-05
1623	temnothorax	R	2	2	H9T001R003	0.995137222704535	0.999427613966832	2.94520543602378e-05	0.000335772994833738	2.36323884398509e-05	-5.02930799418224e-06
1624	temnothorax	R	2	2	H31T001R001	0.995018566480016	0.998125703901551	1.48973673933048e-06	0.000262591973414539	1.71662632292958e-05	5.86116063034292e-06
1625	temnothorax	R	2	2	H31T001R002	0.991559785402974	1.00045635242431	4.02570101119895e-06	0.000154193460015504	-1.71931478372796e-06	9.53356379628921e-06
1626	temnothorax	R	2	2	H31T001R003	0.993925410150134	0.993922504661325	-9.70766388532657e-07	0.000326344888267656	7.75175279153373e-06	1.64110613825202e-05
1627	temnothorax	R	2	2	H31T001R008	1.00031891295985	0.994259245643309	-1.2987963894336e-05	-2.7252228502717e-05	6.51424085800554e-07	8.64445897571166e-06
1628	temnothorax	R	2	2	H31T001R015	0.991805188793327	0.995114241916029	5.76670394225479e-05	0.000407321334396848	6.5641500097838e-06	2.3078451813335e-05
1629	temnothorax	R	2	2	H31T001R017	0.98761973400961	0.997900972481683	-2.41281085333037e-05	0.000691872458992005	-5.515826437436e-06	8.86692069631167e-06
1630	temnothorax	R	2	2	H14T001R002	0.991715802342572	1.00431290034852	-6.01941736448951e-05	8.55179977252331e-05	2.3336492582477e-05	7.12053804808103e-07
1631	temnothorax	R	2	2	H14T001R005	0.999150625903881	0.99802845273848	-7.73262271650947e-07	4.34382981020796e-05	6.27832748910463e-06	6.20398487912873e-06
1632	temnothorax	R	2	2	H14T001R017	0.991958038245104	1.00114491481508	2.13837796457237e-05	0.000243736456586304	1.90790367395329e-05	1.38465868282853e-05
1633	temnothorax	R	2	2	H14T001R024	0.995835033396089	0.993655947128844	-1.51266793198092e-05	-2.49650160018184e-05	1.33131136504502e-05	1.09484396895494e-05
1634	temnothorax	R	2	2	H1T001R005	0.994994596848162	0.999111018372487	-2.74471341411127e-05	0.000179926978826981	3.95710319065952e-06	1.38903734460296e-05
1635	temnothorax	R	2	2	H1T001R007	0.996412042468951	0.997100801326888	7.58994959059064e-06	-0.000247819473345664	9.69184323477455e-06	7.7610712572186e-06
1636	temnothorax	R	2	2	H1T001R010	0.995683203502767	0.999986027466944	7.07475389817216e-06	0.000173377568778477	2.08395028741389e-05	8.29716463011935e-06
1637	temnothorax	R	2	2	H1T001R012	0.996752714820932	0.994387066468239	-1.45597881614384e-05	-0.000168895151608022	2.26043157388446e-05	8.34378083305589e-06
1638	temnothorax	R	2	2	H36T001R005	0.996423525245004	0.997597088984096	-2.00471938430567e-05	0.000249398020740646	6.1850598254247e-06	1.80375300650152e-05
1639	temnothorax	R	2	2	H36T001R011	0.992587712670981	0.998311466192152	-2.70340424918836e-06	8.47464181778192e-05	1.44215942061155e-05	7.98763555270787e-06
1640	temnothorax	R	2	2	H36T001R013	0.990510590435458	0.991589297404486	6.97845151353474e-05	0.00010908301046672	3.40396938914459e-05	8.73855671319757e-06
1641	temnothorax	R	2	3	H16T001R002	0.986868801826441	0.992241019345749	4.13555494566943e-05	0.000135613412951777	1.29428709549329e-05	2.23767570259014e-05
1642	temnothorax	R	2	3	H16T001R003	0.987147536616188	0.9929444776902	2.21864256989129e-05	0.000278735410693438	2.5473246576506e-05	3.02800533680746e-05
1643	temnothorax	R	2	3	H9T001R003	0.995456407049018	0.999616065257331	3.5422032404243e-05	0.000395207049508908	3.98703606141125e-05	1.76933169594389e-05
1644	temnothorax	R	2	3	H31T001R001	0.994462374342314	0.998314185712797	-3.3692855340938e-05	0.00034115475840529	1.00529779536649e-05	2.79113022273618e-05
1645	temnothorax	R	2	3	H31T001R002	0.991079340132167	1.00095397159151	6.31500918307666e-05	0.000184676794252095	2.44068404798672e-05	2.26368677901196e-05
1646	temnothorax	R	2	3	H31T001R003	0.993276898710092	0.993653733775167	5.32021179075815e-06	0.000317518256699602	1.4747460362551e-05	3.83891700143729e-05
1647	temnothorax	R	2	3	H31T001R008	0.999589254989421	0.99452554044303	5.43137167847759e-05	4.97142177759073e-06	2.74509932412325e-05	1.81888322850513e-05
1648	temnothorax	R	2	3	H31T001R015	0.991971350393495	0.994994627946546	0.000124746906526274	0.00039224073876151	4.12192567530133e-05	2.09518237202263e-05
1649	temnothorax	R	2	3	H31T001R017	0.98671643285764	0.998314818930217	-2.46823084378067e-05	0.000747978748842348	9.91922587248505e-06	7.1783603633058e-06
1650	temnothorax	R	2	3	H14T001R002	0.990423141362294	1.00372309417423	-7.6833907953306e-05	0.000117145447987532	9.27434173737539e-06	2.22741933372572e-05
1651	temnothorax	R	2	3	H14T001R005	0.997747827707247	0.997601673094136	-1.64013707118144e-05	0.000143683219834488	8.00226695615058e-06	1.59673547569844e-05
1652	temnothorax	R	2	3	H14T001R017	0.991015078734553	1.00060038002692	-2.45307453985511e-05	0.000223948282691696	3.1936380382326e-05	1.01312856944121e-05
1653	temnothorax	R	2	3	H14T001R024	0.995617876224899	0.993176929544067	5.91043987003925e-05	-3.99376739688227e-05	2.07567136995314e-05	3.53711530341211e-05
1654	temnothorax	R	2	3	H1T001R005	0.994437607096984	0.99903439154776	-1.45186098235506e-05	0.000175936584135178	2.91066440097449e-05	3.13906605097779e-05
1655	temnothorax	R	2	3	H1T001R007	0.996101470702677	0.997291928184527	-0.000105021855192333	-0.000249886760352669	5.00503268853121e-06	1.79160100265377e-05
1656	temnothorax	R	2	3	H1T001R010	0.995512002962522	0.999719977795398	-2.24416682481095e-05	4.23265474962251e-05	3.11865864367388e-05	2.60365257663906e-05
1657	temnothorax	R	2	3	H1T001R012	0.996048531944512	0.994673135713515	-1.62929291159326e-05	-0.000211809459408234	2.13782786738924e-05	8.71881817791404e-06
1658	temnothorax	R	2	3	H36T001R005	0.995571749079479	0.997724637910467	2.37636768187892e-05	0.000268610653574419	1.59349654020536e-05	5.07101018702185e-06
1659	temnothorax	R	2	3	H36T001R011	0.99242968346148	0.998278166035306	2.11246071484178e-05	0.000185728441128663	9.9176467216642e-06	1.01468670093571e-05
1660	temnothorax	R	2	3	H36T001R013	0.989520414255253	0.99125520787334	0.000123849802022258	5.69333461827138e-05	4.1093697355724e-05	1.36474216020578e-05
1661	temnothorax	R	2	4	H16T001R002	0.986938634737088	0.99217973262122	2.03973994838913e-05	0.000222472944381645	3.86300495923153e-05	3.51741089963105e-05
1662	temnothorax	R	2	4	H16T001R003	0.987119303743342	0.992812841169631	4.95488636195587e-05	0.000264482089439493	3.99208442458133e-05	4.88157211360577e-05
1663	temnothorax	R	2	4	H9T001R003	0.995408250097167	0.999587538697146	0.000118910530544884	0.000471315600765749	5.13613302449727e-05	4.29115046854905e-05
1664	temnothorax	R	2	4	H31T001R001	0.994011847213743	0.998276189458276	-9.39589874984625e-05	0.000374844772004303	7.51599840543831e-05	2.57210132732939e-05
1665	temnothorax	R	2	4	H31T001R002	0.990754640279247	1.00097591845243	0.000171350358104491	0.000201266126209923	4.64024085643185e-05	6.50415266892394e-05
1666	temnothorax	R	2	4	H31T001R003	0.992955871969045	0.993549989471729	-1.44523191062377e-05	0.000333936950737642	3.50158365551856e-05	5.16232190145017e-05
1667	temnothorax	R	2	4	H31T001R008	0.999506186321525	0.994556710370178	4.41912543271767e-05	8.94968830517059e-05	1.87064274560058e-05	2.53911796400773e-05
1668	temnothorax	R	2	4	H31T001R015	0.991643210311544	0.994918988298341	0.000121842151747792	0.000466706078295161	6.08265890592871e-05	4.14227011978585e-05
1669	temnothorax	R	2	4	H31T001R017	0.986671134632062	0.998241239446039	-3.0137770423403e-05	0.000711141435342433	7.4424447047141e-05	5.22046554391122e-05
1670	temnothorax	R	2	4	H14T001R002	0.990398370477127	1.00364794073586	-5.54774776037957e-05	0.000179490944830032	4.71538184980034e-05	3.22394915467766e-05
1671	temnothorax	R	2	4	H14T001R005	0.997390956694668	0.997465329742796	0.00010668664254304	0.000106378108831027	4.83664432440648e-05	4.14050125139089e-05
1672	temnothorax	R	2	4	H14T001R017	0.990806558096973	1.00075895806688	1.71760434035679e-05	0.000353038487760873	3.24503777337245e-05	2.25751296722669e-05
1673	temnothorax	R	2	4	H14T001R024	0.995232095289416	0.993021584332589	6.36673112491186e-05	4.00665087389659e-05	2.670309235733e-05	4.72585877123042e-05
1674	temnothorax	R	2	4	H1T001R005	0.994328389858267	0.999081270909289	-2.82013991634502e-05	5.75977194813891e-05	2.51073879396002e-05	5.86969677880192e-05
1675	temnothorax	R	2	4	H1T001R007	0.996396177408369	0.99729873294057	-0.0002320927092471	-0.000163123165759587	5.7784011491801e-05	6.6506150523214e-05
1676	temnothorax	R	2	4	H1T001R010	0.995237934561416	0.999644165253987	-1.11718089957018e-05	-1.38341383949829e-05	3.50385311383566e-05	3.59759715475605e-05
1677	temnothorax	R	2	4	H1T001R012	0.996314778442206	0.994691177400697	0.000131269886446529	-0.000226066191001824	7.06277037888165e-05	3.12359005711919e-05
1678	temnothorax	R	2	4	H36T001R005	0.994973448029532	0.997685356280053	9.09044558212271e-05	0.000124088163749781	3.44973975128518e-05	2.14790391142596e-05
1679	temnothorax	R	2	4	H36T001R011	0.992085066198775	0.998247201125678	0.000187320736043989	0.000267800138786082	3.56464409895673e-05	5.11055295242994e-05
1680	temnothorax	R	2	4	H36T001R013	0.989299233083764	0.991179065013031	0.000158247893261338	4.43317388702376e-05	7.27668924207269e-05	1.88467102407784e-05
1681	temnothorax	R	2	5	H16T001R002	0.987137664668162	0.991966912183845	4.83949836505119e-05	0.000290408544233836	7.13036624103379e-05	6.58690557243455e-05
1682	temnothorax	R	2	5	H16T001R003	0.986853990827849	0.992420527525543	1.8520100637506e-05	0.000342359070967395	0.000116466170051675	7.94936304422875e-05
1683	temnothorax	R	2	5	H9T001R003	0.995413190634882	0.998860480865664	0.000138303561232461	0.000462775355094591	9.62802530380588e-05	9.68190072682397e-05
1684	temnothorax	R	2	5	H31T001R001	0.993811752140888	0.998009486009664	-1.53386177970848e-05	0.000419610390694479	9.39849758344845e-05	5.39558545731164e-05
1685	temnothorax	R	2	5	H31T001R002	0.990868368890523	1.00122298480684	0.000218170038797483	7.81460441254912e-05	9.30866795257182e-05	0.000104340082997428
1686	temnothorax	R	2	5	H31T001R003	0.993055762178934	0.993180939554449	2.41429613934598e-05	0.00033826350131632	0.000102056571038789	8.96363473584364e-05
1687	temnothorax	R	2	5	H31T001R008	0.999316065297843	0.994465217894595	1.66223626771931e-05	0.000219561153933708	8.22769731441348e-05	0.00011163494050123
1688	temnothorax	R	2	5	H31T001R015	0.991583497609847	0.994192388858937	0.000170679621272135	0.000526152989455837	9.05834741961823e-05	7.80192249851549e-05
1689	temnothorax	R	2	5	H31T001R017	0.986593117791613	0.998193608042778	-0.000121211739934638	0.000806239213134911	6.1627159960388e-05	9.54248896349732e-05
1690	temnothorax	R	2	5	H14T001R002	0.990293014212063	1.00282799188817	2.41121254228149e-05	0.000248915665385799	0.000127864161092033	0.000107793573030583
1691	temnothorax	R	2	5	H14T001R005	0.997235097949154	0.997426376379994	7.91389406217676e-05	0.000160106409535555	7.45083722893451e-05	0.000100252435594988
1692	temnothorax	R	2	5	H14T001R017	0.990855184397353	1.00143271813383	-6.5295486622605e-05	0.000399907652803751	9.50219658312027e-05	6.81784696439406e-05
1693	temnothorax	R	2	5	H14T001R024	0.995016044416445	0.992978187663587	8.85446212491573e-05	4.77274677629356e-05	6.47876298805931e-05	0.000109210112112844
1694	temnothorax	R	2	5	H1T001R005	0.994343129448109	0.998294168728482	2.79183871910227e-05	9.2524547277891e-05	6.11607171772189e-05	9.8284282107841e-05
1695	temnothorax	R	2	5	H1T001R007	0.996137062721923	0.996958937124556	-0.000184331274777148	-0.000226104759656091	7.71520729546455e-05	9.52355537974313e-05
1696	temnothorax	R	2	5	H1T001R010	0.994999147407892	0.99951111705119	9.00880431503989e-05	3.84554877667933e-05	8.09297897545029e-05	8.97880796165142e-05
1697	temnothorax	R	2	5	H1T001R012	0.996244277718073	0.994791481103263	0.000309723009040039	-0.000339688479988109	8.95850682260174e-05	7.21046302910459e-05
1698	temnothorax	R	2	5	H36T001R005	0.994699711455923	0.997522917069166	0.000197940994073649	0.000136728778705163	0.000117864170601292	7.90455277485632e-05
1699	temnothorax	R	2	5	H36T001R011	0.992099747859762	0.997464932366474	0.000379762023409051	0.000346001982572292	5.79149248321767e-05	6.38573552506549e-05
1700	temnothorax	R	2	5	H36T001R013	0.989029864907273	0.990689105572167	0.000100555095036896	3.07198146799889e-05	7.53909833508084e-05	9.20132504235323e-05
1701	temnothorax	R	2	6	H16T001R002	0.986962638223595	0.991251395910211	9.13047570395198e-05	0.000244941668664158	0.000178486254649062	0.000139775367634313
1702	temnothorax	R	2	6	H16T001R003	0.986540843354248	0.991817632934497	0.000116146273666771	0.000361645728862951	0.000163003709427637	0.000119756152517088
1703	temnothorax	R	2	6	H9T001R003	0.995364009170046	0.997603631611308	0.00022386291693949	0.000442641707478801	0.000214255379903501	0.000154388779243913
1704	temnothorax	R	2	6	H31T001R001	0.993629536974388	0.997940048338951	-8.26655990974026e-06	0.000526867909375907	0.0002302419946488	0.000132640875643133
1705	temnothorax	R	2	6	H31T001R002	0.9906363430059	1.0018742655411	0.000460058178441731	0.000180802799048863	0.000110557268861256	0.000160080219115718
1706	temnothorax	R	2	6	H31T001R003	0.993043996165216	0.992818883037717	8.55370704194831e-08	0.000553573055810647	0.000203596853736625	0.000185174424335548
1707	temnothorax	R	2	6	H31T001R008	0.998937320255574	0.99476505326888	0.00031040892892959	0.000159683432587201	0.000196757219116662	0.000215226635022109
1708	temnothorax	R	2	6	H31T001R015	0.991884201208295	0.993822960804322	0.000481251860072902	0.000647548855727044	0.000119169358118371	0.000169808746431035
1709	temnothorax	R	2	6	H31T001R017	0.986477175093535	0.998320417749654	0.000247160134998179	0.000873614292815263	0.000204773849510041	0.000139838422762923
1710	temnothorax	R	2	6	H14T001R002	0.990328305686914	1.00133686262065	0.000152579008196123	0.000476705819092133	0.000159943552083132	0.000158526943907984
1711	temnothorax	R	2	6	H14T001R005	0.996922667130083	0.996705874488762	0.00013670876044057	0.000304354457161498	0.000146956086615959	0.00019135615061146
1712	temnothorax	R	2	6	H14T001R017	0.990925449269861	1.00013710949478	0.000298392498815862	0.00051841663621545	0.000197967064001546	0.000229403574969644
1713	temnothorax	R	2	6	H14T001R024	0.995045063989929	0.992492352906833	-5.32030971589246e-05	3.80620154029943e-05	0.000174838238254854	0.000181194168054424
1714	temnothorax	R	2	6	H1T001R005	0.994314942625724	0.996671642214755	-8.98913845567109e-05	5.8963288921668e-05	0.000192740643204783	0.000238280533100366
1715	temnothorax	R	2	6	H1T001R007	0.996107935224472	0.996373540284518	-0.000110829601438849	-0.000100713300321322	0.000132496805781356	0.000176895525272951
1716	temnothorax	R	2	6	H1T001R010	0.994715815885697	0.999280872036983	0.000241471920877978	0.000202087427843954	0.000157953285335008	0.00012879149348123
1717	temnothorax	R	2	6	H1T001R012	0.996113882371434	0.994509537089453	0.000500147054717177	-0.000145292534573976	0.000223934153996844	0.000217476745852596
1718	temnothorax	R	2	6	H36T001R005	0.994506507785374	0.997205430551214	0.00038273568228804	0.000223576484403161	0.000200012798054621	0.000165109275128405
1719	temnothorax	R	2	6	H36T001R011	0.991720653029197	0.995713382520183	0.000292910089815436	0.000189482002059326	0.000169899476737678	0.000141435342768902
1720	temnothorax	R	2	6	H36T001R013	0.988835692883076	0.990211012105076	0.000345382101885613	0.000129806006533913	0.000154949015091493	0.000200412338711887
1721	temnothorax	R	2	7	H16T001R002	0.986896886519464	0.991158855685813	-0.000267451366350234	0.000546402661530488	0.000313923849082699	0.000298363234877693
1722	temnothorax	R	2	7	H16T001R003	0.986058528695045	0.990855335704493	0.000259552913669195	0.000458819396698623	0.000352439078922788	0.000310422247901618
1723	temnothorax	R	2	7	H9T001R003	0.995107400180743	0.997822050400973	0.000699711932631693	0.00063356679320868	0.000341827094589796	0.000327787403956111
1724	temnothorax	R	2	7	H31T001R001	0.993428221438635	0.997877330654073	0.000392658758796478	0.000751746903628004	0.000385805740504074	0.000319510497517875
1725	temnothorax	R	2	7	H31T001R002	0.990766023666606	1.00138322021255	0.000856336186453622	0.000323268771902787	0.000315623543696945	0.00031842853009217
1726	temnothorax	R	2	7	H31T001R003	0.992714118933713	0.992398992517168	5.62919083979889e-05	0.000764706867631875	0.000448071420359798	0.000363323357706071
1727	temnothorax	R	2	7	H31T001R008	0.998638481234537	0.993789353029983	0.000193618426305321	0.000304101019309748	0.000293231110922602	0.000369913333249763
1728	temnothorax	R	2	7	H31T001R015	0.991457899144266	0.992500138388168	0.000434854417838681	0.000660698910806689	0.000296914859564177	0.000317418197421153
1729	temnothorax	R	2	7	H31T001R017	0.986070457498512	0.997524194878979	0.000353170561862083	0.0010151611000756	0.000344327679584919	0.000399495868633772
1730	temnothorax	R	2	7	H14T001R002	0.99023931822436	0.999602283207177	0.000424517931791121	0.000446015512813485	0.000363083373501915	0.000330912109921683
1731	temnothorax	R	2	7	H14T001R005	0.996444740345093	0.9957914266745	0.000453881372853169	0.000626164488834592	0.000362108818720331	0.000401533448454259
1732	temnothorax	R	2	7	H14T001R017	0.990899628051041	0.998509252833958	0.000302551059855612	0.000534875698888669	0.000303414530741856	0.000305856746535893
1733	temnothorax	R	2	7	H14T001R024	0.994172620101001	0.992695509815852	3.17385878757294e-06	0.000482019244374186	0.000291689753229458	0.000381077473540935
1734	temnothorax	R	2	7	H1T001R005	0.994203804536165	0.995341091458196	4.30912046343711e-05	0.000272927138995054	0.000317987052392319	0.000369513131563508
1735	temnothorax	R	2	7	H1T001R007	0.995887428126434	0.995523562924991	0.000575324029664629	4.47871481534864e-05	0.00032386324440677	0.000381463596958397
1736	temnothorax	R	2	7	H1T001R010	0.994144822159968	0.998823260196911	0.000481591347206921	0.000189917729738038	0.00028930313424806	0.000316088713975008
1737	temnothorax	R	2	7	H1T001R012	0.996396546673541	0.9943700697675	0.000532892455712638	-5.56805607936438e-05	0.000366512849050883	0.000366831560277672
1738	temnothorax	R	2	7	H36T001R005	0.994412057243798	0.997265369763683	0.000586588306629905	0.000350182478418534	0.000317890653923167	0.00028683260168136
1739	temnothorax	R	2	7	H36T001R011	0.991536764399787	0.994097726747272	0.000324199094348934	0.000415811624119984	0.000396798217791845	0.000298993931557671
1740	temnothorax	R	2	7	H36T001R013	0.988935743888965	0.989049724602151	0.000574362622837868	1.04802464458405e-05	0.000392110381560625	0.000401553948630837
1741	temnothorax	R	2	8	H16T001R002	0.987069514644342	0.99064743079948	0.000334611264420271	0.000792073698838606	0.000572603900244856	0.000644679194392043
1742	temnothorax	R	2	8	H16T001R003	0.985700616112892	0.989790640759782	0.000538360283020592	0.000607229826753656	0.000743934223501345	0.000710580574192622
1743	temnothorax	R	2	8	H9T001R003	0.99433477541094	0.996865921599145	0.000416334093191384	0.00113476557451958	0.000734743889592129	0.000515259297879288
1744	temnothorax	R	2	8	H31T001R001	0.993309953979724	0.997699072264886	0.000820460490488921	0.00114056633092017	0.000618777391200036	0.000600071749092679
1745	temnothorax	R	2	8	H31T001R002	0.990424931163762	0.999982157627952	0.00103101357460213	0.000475239928180115	0.000572860185722558	0.000642374369490328
1746	temnothorax	R	2	8	H31T001R003	0.992391170754301	0.990651717692034	0.000758908456719147	0.00137277087666821	0.000735142643888502	0.000738182969310616
1747	temnothorax	R	2	8	H31T001R008	0.998263297594498	0.993036758884642	0.000619700335815928	0.000676706390750257	0.000718468790507372	0.00072304885046527
1748	temnothorax	R	2	8	H31T001R015	0.991378412078931	0.991721984831471	0.00084943256749729	0.000857083295194325	0.000553961930955445	0.000776315722220751
1749	temnothorax	R	2	8	H31T001R017	0.985856576256261	0.997230926538486	0.000686351099186305	0.00138684466042957	0.000616462832824978	0.000561717408857682
1750	temnothorax	R	2	8	H14T001R002	0.990019648854043	0.998507223013073	0.000558195065147655	0.000755224982440902	0.000666810338662158	0.000697264664055881
1751	temnothorax	R	2	8	H14T001R005	0.995942151172488	0.994898836179854	0.000424699674246513	0.00126508139205727	0.00076136105221344	0.000852588743845193
1752	temnothorax	R	2	8	H14T001R017	0.990860466127008	0.996285163900221	0.0012167668719928	0.000464816240240982	0.000657587012204326	0.000720042052287542
1753	temnothorax	R	2	8	H14T001R024	0.993151856051976	0.991353809331109	0.000182126709201521	0.000839976717060492	0.000756329211990646	0.000759412389592276
1754	temnothorax	R	2	8	H1T001R005	0.99380895458513	0.994338084179712	0.000332555565873392	0.000920906077170077	0.000658626498440943	0.000770366896066119
1755	temnothorax	R	2	8	H1T001R007	0.995479383397319	0.995360307431989	0.000984073663343877	0.00032088061190099	0.000752673859483762	0.000778966692628507
1756	temnothorax	R	2	8	H1T001R010	0.993320684782495	0.998823280756016	0.00155285847880521	0.000528843840004107	0.000666154795448466	0.000704684530990406
1757	temnothorax	R	2	8	H1T001R012	0.996254390058334	0.993771056653751	0.000714503537987279	0.00028122388935554	0.000792920018948636	0.000735262856289354
1758	temnothorax	R	2	8	H36T001R005	0.994174691119556	0.996943559831887	0.000720736249700577	0.000959798969397439	0.000560988733796692	0.000615448676742455
1759	temnothorax	R	2	8	H36T001R011	0.990773918790313	0.99205091494085	0.000378533860216235	0.000624356310532586	0.000686630047536715	0.000558616069348442
1760	temnothorax	R	2	8	H36T001R013	0.988442252103281	0.988194069809101	0.00105034049609619	0.000377457049650167	0.000692048876059298	0.000642174198184595
1761	temnothorax	R	2	9	H16T001R002	0.985573937316862	0.989665272646258	0.00134204673963532	0.00114936015600045	0.00130965094067312	0.00127104514022172
1762	temnothorax	R	2	9	H16T001R003	0.984833120061171	0.988420769400574	0.0013847924041639	0.00101783690018499	0.00142349191305302	0.00143063270605814
1763	temnothorax	R	2	9	H9T001R003	0.993661783042534	0.995854749614243	0.00104056192444242	0.00101319439972133	0.00143681770540431	0.0013034907810346
1764	temnothorax	R	2	9	H31T001R001	0.992285863632634	0.996849882529621	0.00156088988417085	0.00169949422566886	0.00136805896201384	0.00151007213401678
1765	temnothorax	R	2	9	H31T001R002	0.990135902523279	0.998784598591494	0.00193923849630512	0.00116069585054351	0.0013691442852071	0.00133487126639314
1766	temnothorax	R	2	9	H31T001R003	0.991360692835011	0.989709197073625	0.00144297649866117	0.00223547519520497	0.00137847682161905	0.00120941434456068
1767	temnothorax	R	2	9	H31T001R008	0.997782625647943	0.992026815896449	0.00153017402350352	0.0018754503266421	0.00137166719429748	0.00148872469314163
1768	temnothorax	R	2	9	H31T001R015	0.991066938372976	0.991247176375137	0.00141409276099339	0.00126919904287661	0.00134972987650111	0.00142657169274647
1769	temnothorax	R	2	9	H31T001R017	0.985160872135623	0.996698811885057	0.00144475230261717	0.00269277735763938	0.00142881443757275	0.00127978006169746
1770	temnothorax	R	2	9	H14T001R002	0.988880786604209	0.998323083680558	0.000856964374395378	0.00152458721645217	0.00132316619126513	0.00128779866358781
1771	temnothorax	R	2	9	H14T001R005	0.995536418293249	0.994071276817922	0.00089047249301488	0.00256640408759422	0.00123022788882681	0.00156080881399369
1772	temnothorax	R	2	9	H14T001R017	0.990153958460355	0.995113989537154	0.00217884685938257	0.000828024474387101	0.00144841122734835	0.00134033948453575
1773	temnothorax	R	2	9	H14T001R024	0.992732538174736	0.990814019082658	0.00137686940312066	0.00169284013332022	0.00124978058837827	0.00138011653365979
1774	temnothorax	R	2	9	H1T001R005	0.992935011199079	0.993784049166278	9.95331960975297e-05	0.00148773534081256	0.00135420640692404	0.00151337797997643
1775	temnothorax	R	2	9	H1T001R007	0.994513673326643	0.994455171105355	0.00143780770877374	0.000421808295232384	0.00131380680835567	0.00117910988565483
1776	temnothorax	R	2	9	H1T001R010	0.992152931494843	0.998464776027228	0.00244720018206873	0.00163381148234283	0.0014374050673438	0.00130193713640962
1777	temnothorax	R	2	9	H1T001R012	0.99598002841376	0.992180376640536	0.00115573882579707	0.00116921859949524	0.00134472460877139	0.00131786560648677
1778	temnothorax	R	2	9	H36T001R005	0.993037106373841	0.996145629112256	0.00185913564370869	0.00112623060877566	0.00143825740502548	0.00151658083812105
1779	temnothorax	R	2	9	H36T001R011	0.989719307596539	0.99048093027623	0.00119369877170373	0.00152901671058024	0.00140150297245614	0.00128841587008971
1780	temnothorax	R	2	9	H36T001R013	0.98737795555267	0.987641655720422	0.00156753080440075	0.000972358978291245	0.00153995588706955	0.00134621428901166
1781	temnothorax	R	2	10	H16T001R002	0.983177690934533	0.987720233931903	0.00197716020053846	0.00188286136444305	0.00263437489932831	0.00264726088042187
1782	temnothorax	R	2	10	H16T001R003	0.983473209067159	0.986862656222373	0.00295654262477029	0.000896896490873558	0.00282192870603035	0.00269038688091406
1783	temnothorax	R	2	10	H9T001R003	0.991475013337868	0.994718016786044	0.00207180695334569	0.00326548198918963	0.0027003939707855	0.00263019929193328
1784	temnothorax	R	2	10	H31T001R001	0.99146490455466	0.994793193961044	0.00335992918829486	0.00312982359637784	0.00271936524759218	0.00273854536779668
1785	temnothorax	R	2	10	H31T001R002	0.988264261451972	0.995986522213212	0.00323102990984795	0.0024120634018943	0.00280853139573714	0.00273615465926704
1786	temnothorax	R	2	10	H31T001R003	0.99052339820837	0.988310030585609	0.00357399765973444	0.00343868422294669	0.00265198741765414	0.00283182425688412
1787	temnothorax	R	2	10	H31T001R008	0.99611025222254	0.991173688005449	0.00323605790343491	0.00386709122588525	0.00271484420450524	0.00282947814356089
1788	temnothorax	R	2	10	H31T001R015	0.990039341867329	0.990755394503732	0.00317176792524116	0.00351332474192521	0.00288488202893213	0.00265078337311163
1789	temnothorax	R	2	10	H31T001R017	0.984079900200027	0.995560781179226	0.00334517068252407	0.00436159426012757	0.00277356060035502	0.00281346576424917
1790	temnothorax	R	2	10	H14T001R002	0.987374543979817	0.996660126913006	0.00220492924729886	0.00244996335850767	0.00255752856213574	0.0026069985076764
1791	temnothorax	R	2	10	H14T001R005	0.994318799417659	0.992824089690088	0.00166141116833344	0.00375134184608884	0.00258044233788344	0.00279632556976113
1792	temnothorax	R	2	10	H14T001R017	0.988589616700833	0.993126117076728	0.00333471914872472	0.0028780333151568	0.00275742106064093	0.00286231465165021
1793	temnothorax	R	2	10	H14T001R024	0.991358394736978	0.989359210440321	0.00282678304859644	0.00260088492171762	0.00272730878813847	0.00301745547362345
1794	temnothorax	R	2	10	H1T001R005	0.991550406789388	0.992722550972984	0.000793138183845139	0.0032159177316795	0.00303725714584067	0.00267747347623088
1795	temnothorax	R	2	10	H1T001R007	0.993181855974592	0.993846453652165	0.00227125364121243	0.00186044262063967	0.00291612104831871	0.00280451046920785
1796	temnothorax	R	2	10	H1T001R010	0.991544845963064	0.996917642363145	0.00353587466844723	0.00300167615567187	0.00272006886670538	0.00264229663518679
1797	temnothorax	R	2	10	H1T001R012	0.994042996441597	0.990520761307845	0.00213463528171651	0.00190962650400928	0.00266837345192005	0.00285182740938248
1798	temnothorax	R	2	10	H36T001R005	0.991688110729724	0.995350405080096	0.00406254476141858	0.00231615531257425	0.00272714977962986	0.00278304934222765
1799	temnothorax	R	2	10	H36T001R011	0.988040656233616	0.988363460817857	0.00343307073369697	0.00389114713762978	0.00271522615655166	0.00267072407815997
1800	temnothorax	R	2	10	H36T001R013	0.985908303996958	0.985217164213014	0.00306203536922575	0.00396125598506604	0.002908535282584	0.00268871010525996
1801	temnothorax	R	2	11	H16T001R002	0.980799290369416	0.985719142749316	0.00527119963090897	0.00540683808482105	0.00563388297940551	0.00518154034227293
1802	temnothorax	R	2	11	H16T001R003	0.980946625085401	0.984345042742969	0.00695411454296607	0.0040360395989057	0.00534456922584644	0.00559562988126108
1803	temnothorax	R	2	11	H9T001R003	0.988643736911015	0.990938706680941	0.00411480659075211	0.00534181303677883	0.00563996147003392	0.00550915323261388
1804	temnothorax	R	2	11	H31T001R001	0.987623871697676	0.992579989455253	0.00566170636652821	0.00749042753420542	0.00558256036512786	0.00571419806121088
1805	temnothorax	R	2	11	H31T001R002	0.986027155255881	0.993722238315306	0.0064218574283352	0.00484188382753777	0.00554479967832281	0.00546123370673009
1806	temnothorax	R	2	11	H31T001R003	0.987902447127966	0.98533515637034	0.00478180373396183	0.00728577969555659	0.00563138280135627	0.00569004315575281
1807	temnothorax	R	2	11	H31T001R008	0.994287266101016	0.988616100163971	0.00471863481910426	0.00810990858655133	0.00569832667937312	0.00591639600912044
1808	temnothorax	R	2	11	H31T001R015	0.987364696614799	0.989017107250892	0.00569150525482798	0.00387523340622001	0.00569217519865361	0.0055428018415236
1809	temnothorax	R	2	11	H31T001R017	0.980278443148847	0.993142723232248	0.00611790407881682	0.00658009600356331	0.0056200031351551	0.00544550533832548
1810	temnothorax	R	2	11	H14T001R002	0.98422590824904	0.994337125970405	0.00552105871735481	0.00480876542840083	0.00532489629654578	0.00550437609061029
1811	temnothorax	R	2	11	H14T001R005	0.990965545700837	0.988610289379893	0.00464907693075447	0.00665878232783426	0.00528308323637422	0.00571148267595614
1812	temnothorax	R	2	11	H14T001R017	0.984845420592673	0.988542293209683	0.00518419543407006	0.00464516499865706	0.00565881777937536	0.00537075316369435
1813	temnothorax	R	2	11	H14T001R024	0.988418474926055	0.986519750765824	0.00429202050391036	0.0063378368951405	0.00564897022021951	0.00576755421203085
1814	temnothorax	R	2	11	H1T001R005	0.988192019799125	0.989120131066877	0.00368965504928853	0.00512154881632096	0.00546650047015686	0.00556577794100637
1815	temnothorax	R	2	11	H1T001R007	0.990144795100261	0.990823897032504	0.00543732052840118	0.00461844464803788	0.00531819159561584	0.00551840306632602
1816	temnothorax	R	2	11	H1T001R010	0.988165966405502	0.994027709999626	0.00731210918138768	0.00701313088498079	0.0058482998096821	0.0053956765494509
1817	temnothorax	R	2	11	H1T001R012	0.991560930451162	0.987588940547148	0.00542101239893127	0.00479895084964954	0.00545040278478487	0.00573309552948019
1818	temnothorax	R	2	11	H36T001R005	0.989062570021958	0.993439435794812	0.00711095546654346	0.00634646991676775	0.00579054562875385	0.00564053611442418
1819	temnothorax	R	2	11	H36T001R011	0.986427998522653	0.986439986688987	0.0056972645813059	0.00588021449771444	0.00561546698554648	0.00549146569271563
1820	temnothorax	R	2	11	H36T001R013	0.984478301813113	0.982257196017769	0.00704316296942861	0.00688151837646021	0.00559555361651313	0.00538920809875569
1821	temnothorax	R	2	12	H16T001R002	0.976149600443132	0.979476580134027	0.0107427115675803	0.0094989306290604	0.0108723675816104	0.0108227705326423
1822	temnothorax	R	2	12	H16T001R003	0.974538786993002	0.979353568721219	0.0133728668324243	0.0085432826919398	0.0114517133759528	0.0104761714003303
1823	temnothorax	R	2	12	H9T001R003	0.985312615494356	0.985567358178033	0.00958866037517952	0.0114378700036753	0.0109632693754368	0.011393371437493
1824	temnothorax	R	2	12	H31T001R001	0.982765167529983	0.986087276517405	0.0105269519641963	0.0129823145343708	0.011200071346802	0.0111584155007842
1825	temnothorax	R	2	12	H31T001R002	0.981525816763465	0.986579719861618	0.0123497735844792	0.0104213478091953	0.0113796022943261	0.0118864644409838
1826	temnothorax	R	2	12	H31T001R003	0.982456443007308	0.979790917563629	0.0102148375105989	0.0128013196004727	0.0111669072509089	0.0112923494741118
1827	temnothorax	R	2	12	H31T001R008	0.986945863855534	0.983444671253459	0.010129273222565	0.0144401513973326	0.0113306450537246	0.0119516084635521
1828	temnothorax	R	2	12	H31T001R015	0.980562543407975	0.983965994754243	0.0106220840118818	0.00871136717199541	0.0113495989251637	0.0110329269188443
1829	temnothorax	R	2	12	H31T001R017	0.974332764898425	0.986089095078298	0.0111422258035016	0.0120359884586938	0.0112207933057699	0.0105062414890707
1830	temnothorax	R	2	12	H14T001R002	0.97845579828395	0.989309960241704	0.0114494778261032	0.0105827134993125	0.0113607085915442	0.0111331737777458
1831	temnothorax	R	2	12	H14T001R005	0.984520068991947	0.980997751299209	0.0101300365664519	0.0132632597849502	0.0113867742090407	0.0116484093775573
1832	temnothorax	R	2	12	H14T001R017	0.980199454387766	0.981860750076748	0.0107954168657725	0.0098677495910443	0.0109661437860734	0.0115019039907553
1833	temnothorax	R	2	12	H14T001R024	0.983209987896021	0.981512274058193	0.00983744087247241	0.0123925286052585	0.0114956987705966	0.0112404494073094
1834	temnothorax	R	2	12	H1T001R005	0.983495153974667	0.984740104840651	0.00915759966525492	0.0105271133537951	0.0113395268180245	0.0113285122521346
1835	temnothorax	R	2	12	H1T001R007	0.985242052167523	0.983922848507784	0.0105850449114713	0.0101560346365186	0.011096623496158	0.0116854353297517
1836	temnothorax	R	2	12	H1T001R010	0.981914046289887	0.986170747712445	0.0142027922348943	0.0140207144884621	0.0109085489659527	0.0115517514536136
1837	temnothorax	R	2	12	H1T001R012	0.984524013703599	0.981969057495779	0.0126613338879962	0.00972280546029749	0.0111975137095703	0.011259883857655
1838	temnothorax	R	2	12	H36T001R005	0.983001370271262	0.98708432036001	0.0119104489117819	0.0127560783774773	0.0113367778516919	0.0115403575432528
1839	temnothorax	R	2	12	H36T001R011	0.980827686426896	0.982194677003449	0.0119959851403683	0.0123851820307647	0.0109969211540409	0.0109429927818203
1840	temnothorax	R	2	12	H36T001R013	0.976326809503445	0.977715543242483	0.0118357635996034	0.0131682587245653	0.01145332520253	0.011116103959221
1841	temnothorax	R	2	13	H16T001R002	0.962870455978213	0.967651738639139	0.0211528509201517	0.0241214298095224	0.0228938100908834	0.0225322059522475
1842	temnothorax	R	2	13	H16T001R003	0.963445392760137	0.969904473802396	0.0217867592924318	0.0208475983165949	0.0235973432566881	0.0221671685657889
1843	temnothorax	R	2	13	H9T001R003	0.973934937964283	0.97399310474694	0.0228479314404935	0.0231902656539719	0.0233060038179471	0.0240268511670076
1844	temnothorax	R	2	13	H31T001R001	0.970329254411795	0.974945321011374	0.0229403888984814	0.023318009824018	0.0228424594958252	0.0240557859308835
1845	temnothorax	R	2	13	H31T001R002	0.971658932525339	0.97583717344325	0.023776370305693	0.0182067375792939	0.0227711505464507	0.022776237756651
1846	temnothorax	R	2	13	H31T001R003	0.970354344919399	0.965790376467154	0.0199480267558719	0.026157506819736	0.024029459203855	0.0239918263313354
1847	temnothorax	R	2	13	H31T001R008	0.97715025039274	0.972390914940985	0.0222156152657301	0.0258690258541985	0.0238629645849299	0.0251674930164884
1848	temnothorax	R	2	13	H31T001R015	0.965370111192562	0.971677643675198	0.0230889800344305	0.0195910302884921	0.0233835675125849	0.02327523251654
1849	temnothorax	R	2	13	H31T001R017	0.964217874710042	0.97637948493226	0.0201391768210799	0.0213778799200638	0.0231204115567266	0.0224660380902617
1850	temnothorax	R	2	13	H14T001R002	0.966686009302388	0.976758041126033	0.0248144645167535	0.0208132779046744	0.0225802879419982	0.0227018443637341
1851	temnothorax	R	2	13	H14T001R005	0.973582139333093	0.966587512941104	0.0224373106117342	0.0249988132961912	0.023743401013506	0.024778354505619
1852	temnothorax	R	2	13	H14T001R017	0.970381573063456	0.969690447120913	0.023338480097747	0.0227594406685857	0.0232317621227996	0.0227894573410897
1853	temnothorax	R	2	13	H14T001R024	0.972021797895064	0.972617275237695	0.0221931388524702	0.0229474329699789	0.0239349651763658	0.0238189071573129
1854	temnothorax	R	2	13	H1T001R005	0.971896387670973	0.973870078070113	0.0209075105855229	0.0208268672554875	0.0230776000728885	0.023548005617004
1855	temnothorax	R	2	13	H1T001R007	0.973839950717795	0.973180442841902	0.0219290866350101	0.0251126154225586	0.0238432463898164	0.023921553239569
1856	temnothorax	R	2	13	H1T001R010	0.971206319161938	0.976093976045703	0.0238311443465087	0.026284201886144	0.0231667117303464	0.0240739436082968
1857	temnothorax	R	2	13	H1T001R012	0.976480475189901	0.970360831188024	0.0267734501625907	0.0233009439421679	0.0234150829179792	0.0243717029410085
1858	temnothorax	R	2	13	H36T001R005	0.972538821736619	0.977217059131793	0.0250131183606575	0.029247969275159	0.0236525607903416	0.0237512599238588
1859	temnothorax	R	2	13	H36T001R011	0.968205228039151	0.970253268367022	0.0236647771821282	0.022551740203601	0.0233860569069512	0.0228962771364984
1860	temnothorax	R	2	13	H36T001R013	0.964614825382358	0.967865697240057	0.0229658465752766	0.0255931218326455	0.0238226825150681	0.0220923704558552
1861	temnothorax	R	2	14	H16T001R002	0.942801340623857	0.94462175368269	0.0455206343575961	0.0501949057406445	0.0517342206353249	0.0491680270792611
1862	temnothorax	R	2	14	H16T001R003	0.945039239105436	0.944619448197679	0.0469825142918953	0.0469120156850774	0.0526133463030585	0.0489800503481201
1863	temnothorax	R	2	14	H9T001R003	0.948924720484887	0.954070132528818	0.0536241288927901	0.0529208883477811	0.051850941807248	0.0530717707752997
1864	temnothorax	R	2	14	H31T001R001	0.945277024995096	0.94703414347601	0.0507854800361546	0.0555674393909281	0.0519221254267429	0.0526800109983062
1865	temnothorax	R	2	14	H31T001R002	0.948269054320614	0.953863388588343	0.0527266980607766	0.048468520440147	0.0500777588859176	0.0518328830932857
1866	temnothorax	R	2	14	H31T001R003	0.947741060586683	0.943826669150186	0.0479035929277476	0.0572066135740493	0.0529030355642213	0.0533400701648641
1867	temnothorax	R	2	14	H31T001R008	0.949767148112967	0.945354073949109	0.0566513251167053	0.0550610406580137	0.0514302162931869	0.0563686904244375
1868	temnothorax	R	2	14	H31T001R015	0.946324063644244	0.944999142071189	0.0504895482544938	0.0487189190712304	0.0521478724576349	0.0511957151008095
1869	temnothorax	R	2	14	H31T001R017	0.942333766154743	0.952182566696649	0.0504952832476375	0.0497119734743929	0.0516022117671642	0.0489515016749153
1870	temnothorax	R	2	14	H14T001R002	0.944054116869712	0.953938454334088	0.0558727011053094	0.047311260643734	0.0514636655106309	0.0501426064112633
1871	temnothorax	R	2	14	H14T001R005	0.953645117509159	0.941203963690139	0.0488185752224842	0.055424363436061	0.0505503352569915	0.055985943846177
1872	temnothorax	R	2	14	H14T001R017	0.946360475494966	0.945919880544459	0.0521083878144103	0.0513045414922527	0.0509716350833702	0.0518542839761531
1873	temnothorax	R	2	14	H14T001R024	0.946129849826827	0.950469879576072	0.0500976758429313	0.050620027813583	0.0521653293738536	0.0525244829851113
1874	temnothorax	R	2	14	H1T001R005	0.949741112403809	0.947678146097443	0.0512320099651559	0.0509607432242281	0.0522995391887622	0.0521010133104379
1875	temnothorax	R	2	14	H1T001R007	0.944102537349358	0.95304382996257	0.0463264701099239	0.0527484527380178	0.0516876457207955	0.0541737864987973
1876	temnothorax	R	2	14	H1T001R010	0.946265966161373	0.948492454717461	0.0517285793520611	0.0541115326256111	0.0529941374768737	0.0533182684137389
1877	temnothorax	R	2	14	H1T001R012	0.948684601906413	0.948994427993779	0.0521265543925794	0.0555770457530008	0.0515219800895897	0.0546991078025663
1878	temnothorax	R	2	14	H36T001R005	0.949980379056828	0.954065599693666	0.0547327052381172	0.0609115292655014	0.051981750242748	0.0543971625086986
1879	temnothorax	R	2	14	H36T001R011	0.944147458296012	0.945960758146736	0.0525540350994941	0.0516110352969429	0.0526855057488902	0.0517118992767843
1880	temnothorax	R	2	14	H36T001R013	0.943150612625116	0.944776411118743	0.0485078787790284	0.0549378171811086	0.0520026060213746	0.0511731852514109
1881	temnothorax	R	2	15	H16T001R002	0.895407359699481	0.897480798375352	0.104244021614081	0.110009650319779	0.112955809625478	0.105594712599828
1882	temnothorax	R	2	15	H16T001R003	0.899260941145534	0.901664884305902	0.111058786714822	0.0996728231594354	0.113049776717696	0.105713300258227
1883	temnothorax	R	2	15	H9T001R003	0.900200112305953	0.899208849810882	0.116153495503778	0.12041467773157	0.113223559710469	0.116423060905602
1884	temnothorax	R	2	15	H31T001R001	0.886980517679498	0.895283620559541	0.113840611932935	0.110138938871718	0.11334590942238	0.112264857250869
1885	temnothorax	R	2	15	H31T001R002	0.892764105045977	0.894133315837399	0.119432784262319	0.112903321913242	0.112750897518232	0.110463428641177
1886	temnothorax	R	2	15	H31T001R003	0.898477117454862	0.897268315089563	0.107955474453789	0.118824794378445	0.1137160874815	0.11210569011698
1887	temnothorax	R	2	15	H31T001R008	0.895120377871788	0.892756612164308	0.111011368022494	0.122694918209019	0.112202207573906	0.119452736116302
1888	temnothorax	R	2	15	H31T001R015	0.895580122511366	0.897197576313236	0.115067259478291	0.108413480142929	0.113632064263174	0.109270619470244
1889	temnothorax	R	2	15	H31T001R017	0.891570148640479	0.899683924253157	0.110430364718379	0.0985717578713238	0.111598322167555	0.104625505259147
1890	temnothorax	R	2	15	H14T001R002	0.89469942247522	0.896685702038051	0.12159270032559	0.106219326486033	0.112385731045873	0.108383834827824
1891	temnothorax	R	2	15	H14T001R005	0.898467044107292	0.893117252198239	0.110531994081033	0.12045503516284	0.113727222791294	0.118394288489885
1892	temnothorax	R	2	15	H14T001R017	0.893227875600971	0.894095408017227	0.113994791302279	0.110157158973116	0.111968536705339	0.109585403708586
1893	temnothorax	R	2	15	H14T001R024	0.89086245253222	0.900505449190224	0.109544269923467	0.109820666408713	0.112599797283701	0.113171317341627
1894	temnothorax	R	2	15	H1T001R005	0.897460836474086	0.896311929717407	0.11291738363242	0.114168508158561	0.113604461789512	0.114329779185587
1895	temnothorax	R	2	15	H1T001R007	0.891170978663147	0.899429584129946	0.105316225899726	0.113147660352167	0.113033589645228	0.115764602451424
1896	temnothorax	R	2	15	H1T001R010	0.888409270090326	0.893041846075362	0.117016408893833	0.109044412949164	0.112526906056628	0.11287051975936
1897	temnothorax	R	2	15	H1T001R012	0.894055342547225	0.894619696567938	0.114851353052934	0.125320056382865	0.112136312486907	0.11786533023425
1898	temnothorax	R	2	15	H36T001R005	0.892692978730933	0.896198337688928	0.116019664456682	0.123184027648227	0.112500449653943	0.115732424616537
1899	temnothorax	R	2	15	H36T001R011	0.894638348782462	0.888347271644911	0.110424293710596	0.109191491948126	0.112788821283241	0.110092183791465
1900	temnothorax	R	2	15	H36T001R013	0.898257337558865	0.892862814112778	0.101911829692402	0.115624545452072	0.113148091731785	0.108582494603069
1901	temnothorax	R	2	16	H16T001R002	0.7842096351236	0.786333734718449	0.175090745453906	0.171619456116579	0.183431529690401	0.16984442574163
1902	temnothorax	R	2	16	H16T001R003	0.797805228504442	0.791752159306597	0.18300005416748	0.168928227879475	0.18373783385008	0.175453476581317
1903	temnothorax	R	2	16	H9T001R003	0.779530690983359	0.780697404892202	0.193060036499698	0.188386216655549	0.184977110950014	0.182113342645044
1904	temnothorax	R	2	16	H31T001R001	0.778980548122433	0.782445095084924	0.185590436653508	0.176438711072901	0.184445289120839	0.178524715902038
1905	temnothorax	R	2	16	H31T001R002	0.779960430450501	0.770190471066656	0.194894239936813	0.177837786542329	0.183707885656902	0.175329899984867
1906	temnothorax	R	2	16	H31T001R003	0.783712703724843	0.787893559516435	0.179338315658696	0.186247695206209	0.184780403238471	0.179191554848844
1907	temnothorax	R	2	16	H31T001R008	0.772095884471497	0.782814672552129	0.182517794981791	0.186245250636813	0.183907474060367	0.185626726522022
1908	temnothorax	R	2	16	H31T001R015	0.782600794873265	0.787945604117406	0.189485747981025	0.174873723243477	0.183847521587655	0.17713814444777
1909	temnothorax	R	2	16	H31T001R017	0.791590846303778	0.775298110254081	0.178721502183464	0.171996668203563	0.184227040015054	0.172877922287136
1910	temnothorax	R	2	16	H14T001R002	0.789182509424315	0.770919845983265	0.189022384024364	0.173968773275212	0.184837274359642	0.176714335881571
1911	temnothorax	R	2	16	H14T001R005	0.771248866381041	0.77782561984975	0.181100406502031	0.187238541598417	0.183787453706996	0.181407051823534
1912	temnothorax	R	2	16	H14T001R017	0.789660629610013	0.77899295344178	0.188148377553381	0.181440424140594	0.182870355846874	0.178208785546203
1913	temnothorax	R	2	16	H14T001R024	0.77917867175523	0.793842132827322	0.18348806436457	0.177586030704434	0.18431927554152	0.178515867303838
1914	temnothorax	R	2	16	H1T001R005	0.785095653170804	0.779980542425242	0.181281289072297	0.182211242909829	0.183870881329569	0.181590503642988
1915	temnothorax	R	2	16	H1T001R007	0.77931987771348	0.790297743486598	0.180561715213236	0.18156110671397	0.183489398411844	0.183929477226341
1916	temnothorax	R	2	16	H1T001R010	0.782185483550283	0.776588939895518	0.188690506960551	0.174955357496134	0.184484880196967	0.180307704140525
1917	temnothorax	R	2	16	H1T001R012	0.775468040913851	0.787016086421436	0.180321134056491	0.193673395898444	0.184731841273961	0.182039744046062
1918	temnothorax	R	2	16	H36T001R005	0.777277264423387	0.780907939536049	0.187032617641675	0.185076716842888	0.183572414678077	0.180128537679382
1919	temnothorax	R	2	16	H36T001R011	0.789591933773633	0.778511119858977	0.182331289389593	0.182352024227098	0.183579239630466	0.180692584802818
1920	temnothorax	R	2	16	H36T001R013	0.785464993533837	0.794741612117504	0.172176610496225	0.176340164036381	0.184601191521502	0.174734524852962
1921	temnothorax	R	2	17	H16T001R002	0.614388501527125	0.611729257458865	0.194842587897531	0.192995399982618	0.202247814508016	0.191950097965525
1922	temnothorax	R	2	17	H16T001R003	0.620318174962826	0.605715037388224	0.199074840664316	0.196838753503913	0.201314087302054	0.196854346074491
1923	temnothorax	R	2	17	H9T001R003	0.594794591789055	0.59206974103131	0.210078928309473	0.202021847629592	0.202375386053942	0.197649489940959
1924	temnothorax	R	2	17	H31T001R001	0.604287757707949	0.596614880680367	0.206982343801753	0.199401165348976	0.202467646243615	0.197982419364429
1925	temnothorax	R	2	17	H31T001R002	0.606156568706136	0.584983189436349	0.208623370820109	0.195745603627688	0.202376042434311	0.1948184743053
1926	temnothorax	R	2	17	H31T001R003	0.605870698700277	0.608088666916586	0.201438168380956	0.206315953189037	0.203364616121668	0.198339873779491
1927	temnothorax	R	2	17	H31T001R008	0.587980253727248	0.605248973021812	0.201956942068887	0.195989012177534	0.202814955873165	0.198664195645087
1928	temnothorax	R	2	17	H31T001R015	0.610335829632289	0.611306158446935	0.207589268745198	0.198361235104939	0.201613289627125	0.198818461839741
1929	temnothorax	R	2	17	H31T001R017	0.62255821928972	0.590549816738248	0.199369417896503	0.195382621640883	0.202645447489659	0.19607075598092
1930	temnothorax	R	2	17	H14T001R002	0.613202546904961	0.57924998370575	0.205028347364888	0.199676493777502	0.203197463861802	0.197719918231659
1931	temnothorax	R	2	17	H14T001R005	0.589527533604889	0.596362607025694	0.197284223071108	0.200464898651637	0.202172845933125	0.19755095317664
1932	temnothorax	R	2	17	H14T001R017	0.605547273892348	0.593809664980688	0.203281027391105	0.204462389228024	0.203054728933375	0.195495747844956
1933	temnothorax	R	2	17	H14T001R024	0.598394496778721	0.610100110579126	0.205942072661762	0.197959652415356	0.203411260347967	0.197055339048913
1934	temnothorax	R	2	17	H1T001R005	0.609588020824269	0.59809196563574	0.203522084207891	0.201437173236282	0.202675466594011	0.201968865520091
1935	temnothorax	R	2	17	H1T001R007	0.59662381841914	0.597550683226921	0.197590639174887	0.197919424877818	0.202489770332749	0.197528664946793
1936	temnothorax	R	2	17	H1T001R010	0.603310137408829	0.592230460446512	0.201493359403976	0.194835623309902	0.20287427769356	0.199735517303504
1937	temnothorax	R	2	17	H1T001R012	0.595665644940921	0.597565094670582	0.198295345636193	0.203413500597369	0.2028975846627	0.199851585717381
1938	temnothorax	R	2	17	H36T001R005	0.603860288219553	0.594867972071337	0.201578243627954	0.202291990211778	0.202420678886505	0.19882529132572
1939	temnothorax	R	2	17	H36T001R011	0.614069368037759	0.597249417358432	0.201439107798443	0.200595406231987	0.202588038522393	0.200517729067188
1940	temnothorax	R	2	17	H36T001R013	0.61730247436452	0.614872091082787	0.198575225274846	0.200158507966703	0.201768868163474	0.196984573893098
1941	temnothorax	R	2	18	H16T001R002	0.424951138444556	0.409637756167269	0.164078452692095	0.162682621244761	0.162600025162836	0.166187440157243
1942	temnothorax	R	2	18	H16T001R003	0.424330609466635	0.410156808960859	0.164232699285942	0.163641156906642	0.162682017381681	0.166171488965919
1943	temnothorax	R	2	18	H9T001R003	0.401208236187171	0.384628171122144	0.163711172211322	0.160335659059669	0.164251797561074	0.161428752433974
1944	temnothorax	R	2	18	H31T001R001	0.410336122931808	0.39713285439579	0.166281495992645	0.163101941960195	0.163739483555332	0.164063623397108
1945	temnothorax	R	2	18	H31T001R002	0.414522429236328	0.388411302137985	0.165652142052137	0.163603280583986	0.163168374219861	0.164288515833884
1946	temnothorax	R	2	18	H31T001R003	0.406302994981355	0.410421437220453	0.170235784717779	0.166500501227316	0.162639973434546	0.163160238147454
1947	temnothorax	R	2	18	H31T001R008	0.389658457502297	0.404445795661736	0.164776586928197	0.158750857467143	0.163293692478136	0.15836388447887
1948	temnothorax	R	2	18	H31T001R015	0.41357812047023	0.409259284512683	0.172104555996239	0.166997698468947	0.162957038828006	0.164668114546448
1949	temnothorax	R	2	18	H31T001R017	0.427181452840661	0.385090408424326	0.157623838467615	0.166117124263973	0.162873909731014	0.166618059395877
1950	temnothorax	R	2	18	H14T001R002	0.412300831586388	0.376505849397038	0.160339724568086	0.163781782488564	0.164081409135761	0.164558331471302
1951	temnothorax	R	2	18	H14T001R005	0.391614742274745	0.404464668805663	0.163875507894221	0.161209054836299	0.163058273774412	0.157968633952427
1952	temnothorax	R	2	18	H14T001R017	0.416074566227839	0.39094529090341	0.164020738675015	0.171577441468709	0.163475414415157	0.16528056775564
1953	temnothorax	R	2	18	H14T001R024	0.404420824709881	0.403118952801362	0.16705619217344	0.16118638109483	0.162929735092052	0.163187066211887
1954	temnothorax	R	2	18	H1T001R005	0.410825956614886	0.401080950888915	0.164064570715727	0.164957175231159	0.163270772211547	0.166673198385538
1955	temnothorax	R	2	18	H1T001R007	0.400265379721412	0.393041438794205	0.159467496719931	0.162889204496654	0.16291850315734	0.160666745540172
1956	temnothorax	R	2	18	H1T001R010	0.404704855927988	0.393848013591423	0.162252931987291	0.160665346525722	0.164504926255855	0.162594025187078
1957	temnothorax	R	2	18	H1T001R012	0.40149594193946	0.399383105188742	0.161992949445663	0.163679578839932	0.161322018964153	0.163025368458235
1958	temnothorax	R	2	18	H36T001R005	0.405035433025542	0.390317148279878	0.159075356592694	0.165386800943872	0.162391848831447	0.163012866824052
1959	temnothorax	R	2	18	H36T001R011	0.4100090336447	0.40292601618312	0.163884980623719	0.161962875531423	0.163097314436457	0.162484208350579
1960	temnothorax	R	2	18	H36T001R013	0.421597335012026	0.414929578616098	0.161937669182419	0.166340234554769	0.161184004613988	0.166870805059939
1961	temnothorax	R	2	19	H16T001R002	0.264260272995053	0.244366997453491	0.106455714050076	0.114681289829175	0.107182249896385	0.115755349749413
1962	temnothorax	R	2	19	H16T001R003	0.259838231811173	0.24932642674379	0.109853625101921	0.111822233524779	0.107223028953891	0.115061029197181
1963	temnothorax	R	2	19	H9T001R003	0.238268230377274	0.228583072863882	0.107151950028952	0.107086691005573	0.106412469357307	0.106253364832739
1964	temnothorax	R	2	19	H31T001R001	0.246719084500101	0.230297527694286	0.106527543334208	0.10681778784355	0.106564112105618	0.108745302908947
1965	temnothorax	R	2	19	H31T001R002	0.246011372989521	0.229776799918704	0.106475388588627	0.106702246869953	0.106423390138667	0.10908194377188
1966	temnothorax	R	2	19	H31T001R003	0.245989691374603	0.245292399408513	0.112907643594207	0.108721887055525	0.106006948797837	0.11005042670447
1967	temnothorax	R	2	19	H31T001R008	0.231509464621331	0.244618921710241	0.110337603708374	0.104243504054729	0.107012365190042	0.103962717207954
1968	temnothorax	R	2	19	H31T001R015	0.24857242839711	0.23825180093675	0.110596332535762	0.114398958201095	0.107059802227523	0.10988397713811
1969	temnothorax	R	2	19	H31T001R017	0.264040653203111	0.231200711897486	0.102995804636262	0.114536383870042	0.106885974464235	0.11690876960745
1970	temnothorax	R	2	19	H14T001R002	0.253689020970676	0.222092257377034	0.103812494679382	0.109046707000525	0.107566234024282	0.113015711074045
1971	temnothorax	R	2	19	H14T001R005	0.233685672144639	0.244138170226839	0.112169329975943	0.10769329923062	0.106302094073218	0.103907170033821
1972	temnothorax	R	2	19	H14T001R017	0.250439560073063	0.230677538589818	0.104891458366667	0.115610981394041	0.106801353449551	0.110576796740356
1973	temnothorax	R	2	19	H14T001R024	0.244324815656979	0.239243473008371	0.109595815479413	0.11043088848113	0.106384890349115	0.108906803010956
1974	temnothorax	R	2	19	H1T001R005	0.236629217308302	0.234829432327404	0.10407757347542	0.106426035699881	0.108118234540034	0.106492816234262
1975	temnothorax	R	2	19	H1T001R007	0.24000921055818	0.228384326095126	0.102353720270517	0.109416781019161	0.10707485832786	0.106640704437871
1976	temnothorax	R	2	19	H1T001R010	0.249435608851039	0.229209138990584	0.10414043215204	0.107479778895516	0.106414840418174	0.111455254759401
1977	temnothorax	R	2	19	H1T001R012	0.232910385873237	0.240195207456925	0.105928789265868	0.103814726195933	0.106618226357732	0.104264001113635
1978	temnothorax	R	2	19	H36T001R005	0.242338959353569	0.2284348977801	0.103451739960823	0.110042674263594	0.107016251389383	0.108685356880423
1979	temnothorax	R	2	19	H36T001R011	0.247140555901579	0.244293869753268	0.110087400232091	0.109006009661982	0.106255296476754	0.109555622517091
1980	temnothorax	R	2	19	H36T001R013	0.255135453609549	0.250511536325077	0.108999597462166	0.109387443925438	0.105873073602825	0.112784007638457
1981	temnothorax	R	2	20	H16T001R002	0.150097860347357	0.137075348907111	0.0633861857640591	0.0704285227083307	0.0629967839587465	0.0694820712077008
1982	temnothorax	R	2	20	H16T001R003	0.146862609077082	0.140760998553539	0.0651010718859855	0.0661609373724801	0.0615203181415255	0.0689878986023427
1983	temnothorax	R	2	20	H9T001R003	0.13427556249956	0.126707245183622	0.0627591083426131	0.0630292788476737	0.0619565063115372	0.0629955805929408
1984	temnothorax	R	2	20	H31T001R001	0.135827247390726	0.125652351702985	0.060570560015597	0.0616890604183581	0.0629543396435518	0.0637626002103803
1985	temnothorax	R	2	20	H31T001R002	0.141972301100361	0.124656564368971	0.0637401484602422	0.0653259218212599	0.0635042595094457	0.0665172090848897
1986	temnothorax	R	2	20	H31T001R003	0.134651263023554	0.137959992699713	0.0664950231083284	0.0642458025749208	0.0625814675949924	0.0633624233144304
1987	temnothorax	R	2	20	H31T001R008	0.12747952470029	0.135585778305143	0.0640624465142644	0.0611240326792383	0.0626008006791746	0.0603335603996721
1988	temnothorax	R	2	20	H31T001R015	0.139392190420597	0.13075586451569	0.0644887107798291	0.0669731825712988	0.062716827934969	0.0651975319948076
1989	temnothorax	R	2	20	H31T001R017	0.147976204555769	0.129622137741533	0.0621217021185546	0.0684024828630079	0.0624106167098727	0.0691714248045922
1990	temnothorax	R	2	20	H14T001R002	0.143769860752554	0.125799433024288	0.0631461040189962	0.0659923677125059	0.0623999517901703	0.0677022047314084
1991	temnothorax	R	2	20	H14T001R005	0.128070390120264	0.139421884336569	0.0667085552301573	0.0619851522312437	0.0627995933718079	0.0602792354382121
1992	temnothorax	R	2	20	H14T001R017	0.141603769023104	0.127833985109511	0.0615093165195235	0.0689816169113844	0.0617421822729622	0.0659828235858047
1993	temnothorax	R	2	20	H14T001R024	0.136900821804671	0.132732072497453	0.0631285049106001	0.0651657370908169	0.061782563092848	0.0638509985143026
1994	temnothorax	R	2	20	H1T001R005	0.128122310304859	0.12769714596024	0.0597512315478568	0.0607213808090913	0.0629750174961294	0.0610527988911378
1995	temnothorax	R	2	20	H1T001R007	0.136086931851538	0.129774899404499	0.0627410500729791	0.0669442638176394	0.0626177952566513	0.0641722033824041
1996	temnothorax	R	2	20	H1T001R010	0.135220591119107	0.12424807998399	0.0591495365335734	0.0616708322494464	0.0629182197442699	0.0642529703248977
1997	temnothorax	R	2	20	H1T001R012	0.131439926660695	0.135746041360206	0.0626321662644675	0.0628017041833372	0.0624280486482523	0.0625742021114054
1998	temnothorax	R	2	20	H36T001R005	0.134090640009208	0.126121739002965	0.0608494228081825	0.0632636273777777	0.0624781727439876	0.0636016113325584
1999	temnothorax	R	2	20	H36T001R011	0.136843409768039	0.136628517588832	0.0645781627303185	0.0626477079415446	0.0617678469193111	0.0643459999047254
[truncated: 151,901 more rows]
